# Supplementary material for: Sumoylation stabilizes RACK1B and enhance its interaction with RAP2.6 in the abscisic acid response
Source: PubMed Central journal article supplement (PMC5341030; doi:10.1038/srep44090), 2017-03-08
Supplement: srep44090-s2.pdf [file srep44090-s2.pdf]

# Supplementary Table S1. MS scan for sumoylation sites of RACK1B.

| S1-1 | Reference         | PepCount             | UniquePepCount | CoverPercent | MW       | PI   | Score  | DeltaScore | ExpectValue | Ions | Reference | DIFF_MODIFIED_CANDIDA' | MissCleavag | Modification | MatchedTIC | NumProtease | TerminEngine | Decoy  |   |
|------|-------------------|----------------------|----------------|--------------|----------|------|--------|------------|-------------|------|-----------|------------------------|-------------|--------------|------------|-------------|--------------|--------|---|
|      | FileScan          | Sequence             | MH+            | Diff (MH+)   | Charge   | Rank |        |            |             |      |           |                        |             |              |            |             |              |        |   |
|      | R14009_38         | 733                  | 30             | 68.40%       | 35800.11 | 6.66 |        |            |             |      |           |                        |             |              |            |             |              |        |   |
|      | R14009_38_3_5607  | K.AEAEK#TDGSTGIGNK.T | 1803.83551     | -0.00168     | 2        | 1    | 56.51  | 0          | 1.12E-07    | 0    | R14009_38 |                        | 4.68        | 1 326.122635 | pQTGG (K)  | 0           | 2            | MASCOT | T |
|      | R14009_38_3_5647  | K.AEAEK#TDGSTGIGNK.T | 1803.83551     | -0.00138     | 2        | 1    | 68.4   | 0          | 7.23E-09    | 0    | R14009_38 |                        | 4.68        | 1 326.122635 | pQTGG (K)  | 0           | 2            | MASCOT | T |
|      | R14009_38_3_5679  | K.AEAEK#TDGSTGIGNK.T | 1803.83551     | -0.00082     | 2        | 1    | 79.28  | 0          | 5.90E-10    | 0    | R14009_38 |                        | 4.68        | 1 326.122635 | pQTGG (K)  | 0           | 2            | MASCOT | T |
|      | R14009_38_3_5712  | K.AEAEK#TDGSTGIGNK.T | 1803.83551     | -0.00042     | 2        | 1    | 95.02  | 0          | 1.57E-11    | 0    | R14009_38 |                        | 4.68        | 1 326.122635 | pQTGG (K)  | 0           | 2            | MASCOT | T |
|      | R14009_38_3_5748  | K.AEAEK#TDGSTGIGNK.T | 1803.83551     | -0.00142     | 2        | 1    | 62.75  | 0          | 2.65E-08    | 0    | R14009_38 |                        | 4.68        | 1 326.122635 | pQTGG (K)  | 0           | 2            | MASCOT | T |
|      | R14009_38_3_5783  | K.AEAEK#TDGSTGIGNK.T | 1803.83551     | -0.00064     | 2        | 1    | 48.07  | 0          | 7.80E-07    | 0    | R14009_38 |                        | 4.68        | 1 326.122635 | pQTGG (K)  | 0           | 2            | MASCOT | T |
|      | R14009_38_3_3615  | K.AEAEK#TDGSTGIGNK.T | 1820.86206     | 0.00121      | 2        | 1    | 21.81  | 0          | 3.30E-04    | 0    | R14009_38 |                        | 4.68        | 1 343.149185 | QTGG (K)   | 0           | 2            | MASCOT | T |
|      | R14009_38_3_3621  | K.AEAEK#TDGSTGIGNK.T | 1820.86206     | -0.00046     | 3        | 1    | 31     | 0          | 3.97E-05    | 0    | R14009_38 |                        | 4.68        | 1 343.149185 | QTGG (K)   | 0           | 2            | MASCOT | T |
|      | R14009_38_3_3650  | K.AEAEK#TDGSTGIGNK.T | 1820.86206     | 0.00205      | 2        | 1    | 27.17  | 0          | 9.59E-05    | 0    | R14009_38 |                        | 4.68        | 1 343.149185 | QTGG (K)   | 0           | 2            | MASCOT | T |
|      | R14009_38_3_3661  | K.AEAEK#TDGSTGIGNK.T | 1820.86206     | 0.00014      | 3        | 1    | 45.58  | 0          | 1.38E-06    | 0    | R14009_38 |                        | 4.68        | 1 343.149185 | QTGG (K)   | 0           | 2            | MASCOT | T |
|      | R14009_38_3_3709  | K.AEAEK#TDGSTGIGNK.T | 1820.86206     | 0.00127      | 2        | 1    | 21.29  | 0          | 3.72E-04    | 0    | R14009_38 |                        | 4.68        | 1 343.149185 | QTGG (K)   | 0           | 2            | MASCOT | T |
|      | R14009_38_3_3763  | K.AEAEK#TDGSTGIGNK.T | 1820.86206     | -0.00199     | 2        | 1    | 55.41  | 0          | 1.44E-07    | 0    | R14009_38 |                        | 4.68        | 1 343.149185 | QTGG (K)   | 0           | 2            | MASCOT | T |
|      | R14009_38_3_3773  | K.AEAEK#TDGSTGIGNK.T | 1820.86206     | 0.0008       | 3        | 1    | 41.23  | 0          | 3.77E-06    | 0    | R14009_38 |                        | 4.68        | 1 343.149185 | QTGG (K)   | 0           | 2            | MASCOT | T |
|      | R14009_38_3_3801  | K.AEAEK#TDGSTGIGNK.T | 1820.86206     | 0.00021      | 2        | 1    | 72.24  | 0          | 2.99E-09    | 0    | R14009_38 |                        | 4.68        | 1 343.149185 | QTGG (K)   | 0           | 2            | MASCOT | T |
|      | R14009_38_3_3813  | K.AEAEK#TDGSTGIGNK.T | 1820.86206     | 0.00098      | 3        | 1    | 47.81  | 0          | 8.28E-07    | 0    | R14009_38 |                        | 4.68        | 1 343.149185 | QTGG (K)   | 0           | 2            | MASCOT | T |
|      | R14009_38_3_3834  | K.AEAEK#TDGSTGIGNK.T | 1820.86206     | 0.00087      | 2        | 1    | 59.66  | 0          | 5.41E-08    | 0    | R14009_38 |                        | 4.68        | 1 343.149185 | QTGG (K)   | 0           | 2            | MASCOT | T |
|      | R14009_38_3_3847  | K.AEAEK#TDGSTGIGNK.T | 1820.86206     | 0.00062      | 3        | 1    | 45.6   | 0          | 1.38E-06    | 0    | R14009_38 |                        | 4.68        | 1 343.149185 | QTGG (K)   | 0           | 2            | MASCOT | T |
|      | R14009_38_3_3866  | K.AEAEK#TDGSTGIGNK.T | 1820.86206     | 0.00047      | 2        | 1    | 53.4   | 0          | 2.29E-07    | 0    | R14009_38 |                        | 4.68        | 1 343.149185 | QTGG (K)   | 0           | 2            | MASCOT | T |
|      | R14009_38_3_3887  | K.AEAEK#TDGSTGIGNK.T | 1820.86206     | 0.00074      | 3        | 1    | 59.95  | 0          | 5.06E-08    | 0    | R14009_38 |                        | 4.68        | 1 343.149185 | QTGG (K)   | 0           | 2            | MASCOT | T |
|      | R14009_38_3_3899  | K.AEAEK#TDGSTGIGNK.T | 1820.86206     | 0.00045      | 2        | 1    | 54.32  | 0          | 1.85E-07    | 0    | R14009_38 |                        | 4.68        | 1 343.149185 | QTGG (K)   | 0           | 2            | MASCOT | T |
|      | R14009_38_3_2935  | K.AEAEKTDGSTGIGNK.T  | 1477.71287     | 0.00081      | 2        | 1    | 25.14  | 0          | 1.53E-04    | 0    | R14009_38 |                        | 4.68        | 1            |            |             | 2            | MASCOT | T |
|      | R14009_38_3_2975  | K.AEAEKTDGSTGIGNK.T  | 1477.71287     | 0.00109      | 2        | 1    | 96.74  | 0          | 1.06E-11    | 0    | R14009_38 |                        | 4.68        | 1            |            |             | 2            | MASCOT | T |
|      | R14009_38_3_3015  | K.AEAEKTDGSTGIGNK.T  | 1477.71287     | 0.00081      | 2        | 1    | 106.55 | 0          | 1.11E-12    | 0    | R14009_38 |                        | 4.68        | 1            |            |             | 2            | MASCOT | T |
|      | R14009_38_3_3050  | K.AEAEKTDGSTGIGNK.T  | 1477.71287     | 0.00109      | 2        | 1    | 99.34  | 0          | 5.82E-12    | 0    | R14009_38 |                        | 4.68        | 1            |            |             | 2            | MASCOT | T |
|      | R14009_38_3_3087  | K.AEAEKTDGSTGIGNK.T  | 1477.71287     | 0.00107      | 2        | 1    | 62.23  | 0          | 2.99E-08    | 0    | R14009_38 |                        | 4.68        | 1            |            |             | 2            | MASCOT | T |
|      | R14009_38_3_25140 | K.DGVILLWDLAEGKK.L   | 1556.86825     | -0.00099     | 2        | 1    | 32.51  | 0          | 2.81E-05    | 0    | R14009_38 |                        | 4.56        | 1            |            |             | 2            | MASCOT | T |
|      | R14009_38_3_25173 | K.DGVILLWDLAEGKK.L   | 1556.86825     | -0.00152     | 3        | 1    | 26.87  | 0          | 1.03E-04    | 0    | R14009_38 |                        | 4.56        | 1            |            |             | 2            | MASCOT | T |
|      | R14009_38_3_25181 | K.DGVILLWDLAEGKK.L   | 1556.86825     | -0.00081     | 2        | 1    | 60.43  | 0          | 4.53E-08    | 0    | R14009_38 |                        | 4.56        | 1            |            |             | 2            | MASCOT | T |
|      | R14009_38_3_25213 | K.DGVILLWDLAEGKK.L   | 1556.86825     | -0.00125     | 3        | 1    | 44.02  | 0          | 1.98E-06    | 0    | R14009_38 |                        | 4.56        | 1            |            |             | 2            | MASCOT | T |
|      | R14009_38_3_25220 | K.DGVILLWDLAEGKK.L   | 1556.86825     | -0.00029     | 2        | 1    | 56.64  | 0          | 1.08E-07    | 0    | R14009_38 |                        | 4.56        | 1            |            |             | 2            | MASCOT | T |
|      | R14009_38_3_25253 | K.DGVILLWDLAEGKK.L   | 1556.86825     | -0.00047     | 2        | 1    | 60.16  | 0          | 4.82E-08    | 0    | R14009_38 |                        | 4.56        | 1            |            |             | 2            | MASCOT | T |
|      | R14009_38_3_25254 | K.DGVILLWDLAEGKK.L   | 1556.86825     | -0.0014      | 3        | 1    | 48.62  | 0          | 6.87E-07    | 0    | R14009_38 |                        | 4.56        | 1            |            |             | 2            | MASCOT | T |
|      | R14009_38_3_25286 | K.DGVILLWDLAEGKK.L   | 1556.86825     | -0.00069     | 2        | 1    | 58.23  | 0          | 7.52E-08    | 0    | R14009_38 |                        | 4.56        | 1            |            |             | 2            | MASCOT | T |
|      | R14009_38_3_25287 | K.DGVILLWDLAEGKK.L   | 1556.86825     | -0.00291     | 3        | 1    | 49.31  | 0          | 5.86E-07    | 0    | R14009_38 |                        | 4.56        | 1            |            |             | 2            | MASCOT | T |
|      | R14009_38_3_25319 | K.DGVILLWDLAEGKK.L   | 1556.86825     | -0.00067     | 2        | 1    | 60.02  | 0          | 4.98E-08    | 0    | R14009_38 |                        | 4.56        | 1            |            |             | 2            | MASCOT | T |
|      | R14009_38_3_25320 | K.DGVILLWDLAEGKK.L   | 1556.86825     | -0.00327     | 3        | 1    | 44.3   | 0          | 1.86E-06    | 0    | R14009_38 |                        | 4.56        | 1            |            |             | 2            | MASCOT | T |
|      | R14009_38_3_25352 | K.DGVILLWDLAEGKK.L   | 1556.86825     | -0.00071     | 2        | 1    | 58.24  | 0          | 7.50E-08    | 0    | R14009_38 |                        | 4.56        | 1            |            |             | 2            | MASCOT | T |
|      | R14009_38_3_25353 | K.DGVILLWDLAEGKK.L   | 1556.86825     | -0.00338     | 3        | 1    | 60.33  | 0          | 4.63E-08    | 0    | R14009_38 |                        | 4.56        | 1            |            |             | 2            | MASCOT | T |
|      | R14009_38_3_25385 | K.DGVILLWDLAEGKK.L   | 1556.86825     | -0.00123     | 2        | 1    | 60.06  | 0          | 4.93E-08    | 0    | R14009_38 |                        | 4.56        | 1            |            |             | 2            | MASCOT | T |
|      | R14009_38_3_25386 | K.DGVILLWDLAEGKK.L   | 1556.86825     | -0.00476     | 3        | 1    | 64.05  | 0          | 1.97E-08    | 0    | R14009_38 |                        | 4.56        | 1            |            |             | 2            | MASCOT | T |
|      | R14009_38_3_25418 | K.DGVILLWDLAEGKK.L   | 1556.86825     | -0.00073     | 2        | 1    | 60.02  | 0          | 4.98E-08    | 0    | R14009_38 |                        | 4.56        | 1            |            |             | 2            | MASCOT | T |
|      | R14009_38_3_25419 | K.DGVILLWDLAEGKK.L   | 1556.86825     | -0.00372     | 3        | 1    | 63.99  | 0          | 2.00E-08    | 0    | R14009_38 |                        | 4.56        | 1            |            |             | 2            | MASCOT | T |
|      | R14009_38_3_25451 | K.DGVILLWDLAEGKK.L   | 1556.86825     | -0.00073     | 2        | 1    | 60     | 0          | 5.00E-08    | 0    | R14009_38 |                        | 4.56        | 1            |            |             | 2            | MASCOT | T |
|      | R14009_38_3_25452 | K.DGVILLWDLAEGKK.L   | 1556.86825     | -0.00354     | 3        | 1    | 64.09  | 0          | 1.95E-08    | 0    | R14009_38 |                        | 4.56        | 1            |            |             | 2            | MASCOT | T |
|      | R14009_38_3_25484 | K.DGVILLWDLAEGKK.L   | 1556.86825     | -0.00049     | 2        | 1    | 59.52  | 0          | 5.58E-08    | 0    | R14009_38 |                        | 4.56        | 1            |            |             | 2            | MASCOT | T |
|      | R14009_38_3_25485 | K.DGVILLWDLAEGKK.L   | 1556.86825     | -0.00374     | 3        | 1    | 57.03  | 0          | 9.91E-08    | 0    | R14009_38 |                        | 4.56        | 1            |            |             | 2            | MASCOT | T |
|      | R14009_38_3_25517 | K.DGVILLWDLAEGKK.L   | 1556.86825     | -0.00041     | 2        | 1    | 60.05  | 0          | 4.94E-08    | 0    | R14009_38 |                        | 4.56        | 1            |            |             | 2            | MASCOT | T |
|      | R14009_38_3_25518 | K.DGVILLWDLAEGKK.L   | 1556.86825     | -0.0026      | 2        | 1    | 51.2   | 0          | 3.79E-07    | 0    | R14009_38 |                        | 4.56        | 1            |            |             | 2            | MASCOT | T |
|      | R14009_38_3_25550 | K.DGVILLWDLAEGKK.L   | 1556.86825     | -0.00073     | 2        | 1    | 60.15  | 0          | 4.83E-08    | 0    | R14009_38 |                        | 4.56        | 1            |            |             | 2            | MASCOT | T |
|      | R14009_38_3_25551 | K.DGVILLWDLAEGKK.L   | 1556.86825     | -0.00221     | 3        | 1    | 68.24  | 0          | 7.50E-09    | 0    | R14009_38 |                        | 4.56        | 1            |            |             | 2            | MASCOT | T |
|      | R14009_38_3_25583 | K.DGVILLWDLAEGKK.L   | 1556.86825     | -0.00075     | 2        | 1    | 71.85  | 0          | 3.27E-09    | 0    | R14009_38 |                        | 4.56        | 1            |            |             | 2            | MASCOT | T |
|      | R14009_38_3_25584 | K.DGVILLWDLAEGKK.L   | 1556.86825     | -0.00174     | 3        | 1    | 46.48  | 0          | 1.12E-06    | 0    | R14009_38 |                        | 4.56        | 1            |            |             | 2            | MASCOT | T |
|      | R14009_38_3_25616 | K.DGVILLWDLAEGKK.L   | 1556.86825     | -0.00053     | 2        | 1    | 60.28  | 0          | 4.69E-08    | 0    | R14009_38 |                        | 4.56        | 1            |            |             | 2            | MASCOT | T |
|      | R14009_38_3_25617 | K.DGVILLWDLAEGKK.L   | 1556.86825     | -0.00161     | 3        | 1    | 51.17  | 0          | 3.82E-07    | 0    | R14009_38 |                        | 4.56        | 1            |            |             | 2            | MASCOT | T |
|      | R14009_38_3_25649 | K.DGVILLWDLAEGKK.L   | 1556.86825     | -0.00041     | 2        | 1    | 67.72  | 0          | 8.45E-09    | 0    | R14009_38 |                        | 4.56        | 1            |            |             | 2            | MASCOT | T |
|      | R14009_38_3_25651 | K.DGVILLWDLAEGKK.L   | 1556.86825     | -0.00098     | 3        | 1    | 51.37  | 0          | 3.65E-07    | 0    | R14009_38 |                        | 4.56        | 1            |            |             | 2            | MASCOT | T |
|      | R14009_38_3_25684 | K.DGVILLWDLAEGKK.L   | 1556.86825     | -0.00023     | 2        | 1    | 58.43  | 0          | 7.18E-08    | 0    | R14009_38 |                        | 4.56        | 1            |            |             | 2            | MASCOT | T |
|      | R14009_38_3_25685 | K.DGVILLWDLAEGKK.L   | 1556.86825     | -0.00194     | 3        | 1    | 44.76  | 0          | 1.67E-06    | 0    | R14009_38 |                        | 4.56        | 1            |            |             | 2            | MASCOT | T |
|      | R14009_38_3_25717 | K.DGV                |                |              |          |      |        |            |             |      |           |                        |             |              |            |             |              |        |   |

|                   |                      |            |          |   |   |       |   |          |   |           |      |   |   |   |        |   |
|-------------------|----------------------|------------|----------|---|---|-------|---|----------|---|-----------|------|---|---|---|--------|---|
| R14009_38_3_25861 | K. DGVILLWDLAEGKK. L | 1556.86825 | -0.0003  | 3 | 1 | 57.86 | 0 | 8.18E-08 | 0 | R14009_38 | 4.56 | 1 | 0 | 2 | MASCOT | T |
| R14009_38_3_25882 | K. DGVILLWDLAEGKK. L | 1556.86825 | -0.00003 | 2 | 1 | 69.78 | 0 | 5.26E-09 | 0 | R14009_38 | 4.56 | 1 | 0 | 2 | MASCOT | T |
| R14009_38_3_25897 | K. DGVILLWDLAEGKK. L | 1556.86825 | -0.00039 | 3 | 1 | 30.94 | 0 | 4.03E-05 | 0 | R14009_38 | 4.56 | 1 | 0 | 2 | MASCOT | T |
| R14009_38_3_25915 | K. DGVILLWDLAEGKK. L | 1556.86825 | 0.00019  | 2 | 1 | 63.41 | 0 | 2.28E-08 | 0 | R14009_38 | 4.56 | 1 | 0 | 2 | MASCOT | T |
| R14009_38_3_25941 | K. DGVILLWDLAEGKK. L | 1556.86825 | -0.00008 | 3 | 1 | 32.22 | 0 | 3.00E-05 | 0 | R14009_38 | 4.56 | 1 | 0 | 2 | MASCOT | T |
| R14009_38_3_25951 | K. DGVILLWDLAEGKK. L | 1556.86825 | 0.00065  | 2 | 1 | 76.84 | 0 | 1.04E-09 | 0 | R14009_38 | 4.56 | 1 | 0 | 2 | MASCOT | T |
| R14009_38_3_25987 | K. DGVILLWDLAEGKK. L | 1556.86825 | -0.00008 | 3 | 1 | 35.04 | 0 | 1.57E-05 | 0 | R14009_38 | 4.56 | 1 | 0 | 2 | MASCOT | T |
| R14009_38_3_25995 | K. DGVILLWDLAEGKK. L | 1556.86825 | 0.00119  | 2 | 1 | 67.09 | 0 | 9.77E-09 | 0 | R14009_38 | 4.56 | 1 | 0 | 2 | MASCOT | T |
| R14009_38_3_26040 | K. DGVILLWDLAEGKK. L | 1556.86825 | 0.00351  | 2 | 1 | 68.29 | 0 | 7.41E-09 | 0 | R14009_38 | 4.56 | 1 | 0 | 2 | MASCOT | T |
| R14009_38_3_26085 | K. DGVILLWDLAEGKK. L | 1556.86825 | -0.00757 | 2 | 1 | 49.85 | 0 | 5.18E-07 | 0 | R14009_38 | 4.56 | 1 | 0 | 2 | MASCOT | T |
| R14009_38_3_26129 | K. DGVILLWDLAEGKK. L | 1556.86825 | -0.02305 | 2 | 1 | 84.76 | 0 | 1.67E-10 | 0 | R14009_38 | 4.56 | 1 | 0 | 2 | MASCOT | T |
| R14009_38_3_26174 | K. DGVILLWDLAEGKK. L | 1556.86825 | -0.02175 | 2 | 1 | 72.66 | 0 | 2.71E-09 | 0 | R14009_38 | 4.56 | 1 | 0 | 2 | MASCOT | T |
| R14009_38_3_26219 | K. DGVILLWDLAEGKK. L | 1556.86825 | -0.02347 | 2 | 1 | 42.13 | 0 | 3.06E-06 | 0 | R14009_38 | 4.56 | 1 | 0 | 2 | MASCOT | T |
| R14009_38_3_26273 | K. DGVILLWDLAEGKK. L | 1556.86825 | -0.02905 | 2 | 1 | 45.49 | 0 | 1.41E-06 | 0 | R14009_38 | 4.56 | 1 | 0 | 2 | MASCOT | T |
| R14009_38_3_26317 | K. DGVILLWDLAEGKK. L | 1556.86825 | -0.02797 | 2 | 1 | 65    | 0 | 1.58E-08 | 0 | R14009_38 | 4.56 | 1 | 0 | 2 | MASCOT | T |
| R14009_38_3_26360 | K. DGVILLWDLAEGKK. L | 1556.86825 | -0.02693 | 2 | 1 | 46.43 | 0 | 1.14E-06 | 0 | R14009_38 | 4.56 | 1 | 0 | 2 | MASCOT | T |
| R14009_38_3_26413 | K. DGVILLWDLAEGKK. L | 1556.86825 | -0.02051 | 2 | 1 | 49.16 | 0 | 6.07E-07 | 0 | R14009_38 | 4.56 | 1 | 0 | 2 | MASCOT | T |
| R14009_38_3_26460 | K. DGVILLWDLAEGKK. L | 1556.86825 | -0.02511 | 2 | 1 | 51.51 | 0 | 3.53E-07 | 0 | R14009_38 | 4.56 | 1 | 0 | 2 | MASCOT | T |
| R14009_38_3_26503 | K. DGVILLWDLAEGKK. L | 1556.86825 | -0.02879 | 2 | 1 | 37.93 | 0 | 8.05E-06 | 0 | R14009_38 | 4.56 | 1 | 0 | 2 | MASCOT | T |
| R14009_38_3_26547 | K. DGVILLWDLAEGKK. L | 1556.86825 | -0.02829 | 2 | 1 | 48.94 | 0 | 6.38E-07 | 0 | R14009_38 | 4.56 | 1 | 0 | 2 | MASCOT | T |
| R14009_38_3_26590 | K. DGVILLWDLAEGKK. L | 1556.86825 | -0.02581 | 2 | 1 | 44.89 | 0 | 1.62E-06 | 0 | R14009_38 | 4.56 | 1 | 0 | 2 | MASCOT | T |
| R14009_38_3_26633 | K. DGVILLWDLAEGKK. L | 1556.86825 | -0.02667 | 2 | 1 | 45.74 | 0 | 1.33E-06 | 0 | R14009_38 | 4.56 | 1 | 0 | 2 | MASCOT | T |
| R14009_38_3_26680 | K. DGVILLWDLAEGKK. L | 1556.86825 | -0.02539 | 2 | 1 | 64.49 | 0 | 1.78E-08 | 0 | R14009_38 | 4.56 | 1 | 0 | 2 | MASCOT | T |
| R14009_38_3_26723 | K. DGVILLWDLAEGKK. L | 1556.86825 | -0.02817 | 2 | 1 | 48.44 | 0 | 7.16E-07 | 0 | R14009_38 | 4.56 | 1 | 0 | 2 | MASCOT | T |
| R14009_38_3_26766 | K. DGVILLWDLAEGKK. L | 1556.86825 | -0.02805 | 2 | 1 | 59.97 | 0 | 5.03E-08 | 0 | R14009_38 | 4.56 | 1 | 0 | 2 | MASCOT | T |
| R14009_38_3_26808 | K. DGVILLWDLAEGKK. L | 1556.86825 | -0.01789 | 2 | 1 | 57.49 | 0 | 8.91E-08 | 0 | R14009_38 | 4.56 | 1 | 0 | 2 | MASCOT | T |
| R14009_38_3_26855 | K. DGVILLWDLAEGKK. L | 1556.86825 | -0.00625 | 2 | 1 | 34.88 | 0 | 1.63E-05 | 0 | R14009_38 | 4.56 | 1 | 0 | 2 | MASCOT | T |
| R14009_38_3_26898 | K. DGVILLWDLAEGKK. L | 1556.86825 | -0.00583 | 2 | 1 | 42.66 | 0 | 2.71E-06 | 0 | R14009_38 | 4.56 | 1 | 0 | 2 | MASCOT | T |
| R14009_38_3_26955 | K. DGVILLWDLAEGKK. L | 1556.86825 | -0.00295 | 2 | 1 | 36.96 | 0 | 1.01E-05 | 0 | R14009_38 | 4.56 | 1 | 0 | 2 | MASCOT | T |
| R14009_38_3_27238 | K. DGVILLWDLAEGKK. L | 1556.86825 | 0.00189  | 2 | 1 | 36.52 | 0 | 1.11E-05 | 0 | R14009_38 | 4.56 | 1 | 0 | 2 | MASCOT | T |
| R14009_38_3_27623 | K. DGVILLWDLAEGKK. L | 1556.86825 | -0.00111 | 2 | 1 | 44.75 | 0 | 1.67E-06 | 0 | R14009_38 | 4.56 | 1 | 0 | 2 | MASCOT | T |
| R14009_38_3_27666 | K. DGVILLWDLAEGKK. L | 1556.86825 | -0.00159 | 2 | 1 | 53.09 | 0 | 2.45E-07 | 0 | R14009_38 | 4.56 | 1 | 0 | 2 | MASCOT | T |
| R14009_38_3_27708 | K. DGVILLWDLAEGKK. L | 1556.86825 | -0.00003 | 2 | 1 | 60.08 | 0 | 4.91E-08 | 0 | R14009_38 | 4.56 | 1 | 0 | 2 | MASCOT | T |
| R14009_38_3_27749 | K. DGVILLWDLAEGKK. L | 1556.86825 | -0.00111 | 2 | 1 | 57.5  | 0 | 8.89E-08 | 0 | R14009_38 | 4.56 | 1 | 0 | 2 | MASCOT | T |
| R14009_38_3_27774 | K. DGVILLWDLAEGKK. L | 1556.86825 | -0.00341 | 3 | 1 | 20.05 | 0 | 4.94E-04 | 0 | R14009_38 | 4.56 | 1 | 0 | 2 | MASCOT | T |
| R14009_38_3_27782 | K. DGVILLWDLAEGKK. L | 1556.86825 | -0.00047 | 2 | 1 | 63.98 | 0 | 2.00E-08 | 0 | R14009_38 | 4.56 | 1 | 0 | 2 | MASCOT | T |
| R14009_38_3_27814 | K. DGVILLWDLAEGKK. L | 1556.86825 | 0.00011  | 2 | 1 | 59.55 | 0 | 5.55E-08 | 0 | R14009_38 | 4.56 | 1 | 0 | 2 | MASCOT | T |
| R14009_38_3_27848 | K. DGVILLWDLAEGKK. L | 1556.86825 | -0.00049 | 2 | 1 | 59.08 | 0 | 6.18E-08 | 0 | R14009_38 | 4.56 | 1 | 0 | 2 | MASCOT | T |
| R14009_38_3_27881 | K. DGVILLWDLAEGKK. L | 1556.86825 | -0.00031 | 2 | 1 | 67.63 | 0 | 8.63E-09 | 0 | R14009_38 | 4.56 | 1 | 0 | 2 | MASCOT | T |
| R14009_38_3_27915 | K. DGVILLWDLAEGKK. L | 1556.86825 | 0.00001  | 2 | 1 | 61.65 | 0 | 3.42E-08 | 0 | R14009_38 | 4.56 | 1 | 0 | 2 | MASCOT | T |
| R14009_38_3_27948 | K. DGVILLWDLAEGKK. L | 1556.86825 | -0.00021 | 2 | 1 | 66.93 | 0 | 1.01E-08 | 0 | R14009_38 | 4.56 | 1 | 0 | 2 | MASCOT | T |
| R14009_38_3_27982 | K. DGVILLWDLAEGKK. L | 1556.86825 | 0.00105  | 2 | 1 | 52.76 | 0 | 2.65E-07 | 0 | R14009_38 | 4.56 | 1 | 0 | 2 | MASCOT | T |
| R14009_38_3_28019 | K. DGVILLWDLAEGKK. L | 1556.86825 | -0.00133 | 2 | 1 | 28.81 | 0 | 6.58E-05 | 0 | R14009_38 | 4.56 | 1 | 0 | 2 | MASCOT | T |
| R14009_38_3_19114 | K. DVLSVAFSTDNR. Q   | 1323.65393 | -0.00222 | 2 | 1 | 65.09 | 0 | 1.55E-08 | 0 | R14009_38 | 4.21 | 0 | 0 | 2 | MASCOT | T |
| R14009_38_3_19156 | K. DVLSVAFSTDNR. Q   | 1323.65393 | -0.0022  | 2 | 1 | 78.96 | 0 | 6.35E-10 | 0 | R14009_38 | 4.21 | 0 | 0 | 2 | MASCOT | T |
| R14009_38_3_19200 | K. DVLSVAFSTDNR. Q   | 1323.65393 | -0.00016 | 2 | 1 | 71.88 | 0 | 3.24E-09 | 0 | R14009_38 | 4.21 | 0 | 0 | 2 | MASCOT | T |
| R14009_38_3_19242 | K. DVLSVAFSTDNR. Q   | 1323.65393 | 0.00088  | 2 | 1 | 75.58 | 0 | 1.38E-09 | 0 | R14009_38 | 4.21 | 0 | 0 | 2 | MASCOT | T |
| R14009_38_3_19284 | K. DVLSVAFSTDNR. Q   | 1323.65393 | 0.00066  | 2 | 1 | 63.4  | 0 | 2.29E-08 | 0 | R14009_38 | 4.21 | 0 | 0 | 2 | MASCOT | T |
| R14009_38_3_19328 | K. DVLSVAFSTDNR. Q   | 1323.65393 | 0.00012  | 2 | 1 | 82.16 | 0 | 3.04E-10 | 0 | R14009_38 | 4.21 | 0 | 0 | 2 | MASCOT | T |
| R14009_38_3_19361 | K. DVLSVAFSTDNR. Q   | 1323.65393 | 0.00026  | 2 | 1 | 76.17 | 0 | 1.21E-09 | 0 | R14009_38 | 4.21 | 0 | 0 | 2 | MASCOT | T |
| R14009_38_3_19395 | K. DVLSVAFSTDNR. Q   | 1323.65393 | 0.00056  | 2 | 1 | 78.36 | 0 | 7.29E-10 | 0 | R14009_38 | 4.21 | 0 | 0 | 2 | MASCOT | T |
| R14009_38_3_19438 | K. DVLSVAFSTDNR. Q   | 1323.65393 | 0.00094  | 2 | 1 | 65.75 | 0 | 1.33E-08 | 0 | R14009_38 | 4.21 | 0 | 0 | 2 | MASCOT | T |
| R14009_38_3_19470 | K. DVLSVAFSTDNR. Q   | 1323.65393 | 0.00034  | 2 | 1 | 76.66 | 0 | 1.08E-09 | 0 | R14009_38 | 4.21 | 0 | 0 | 2 | MASCOT | T |
| R14009_38_3_19503 | K. DVLSVAFSTDNR. Q   | 1323.65393 | 0.00092  | 2 | 1 | 75.5  | 0 | 1.41E-09 | 0 | R14009_38 | 4.21 | 0 | 0 | 2 | MASCOT | T |
| R14009_38_3_19536 | K. DVLSVAFSTDNR. Q   | 1323.65393 | 0.00048  | 2 | 1 | 75.44 | 0 | 1.43E-09 | 0 | R14009_38 | 4.21 | 0 | 0 | 2 | MASCOT | T |
| R14009_38_3_19568 | K. DVLSVAFSTDNR. Q   | 1323.65393 | 0.0003   | 2 | 1 | 75.02 | 0 | 1.57E-09 | 0 | R14009_38 | 4.21 | 0 | 0 | 2 | MASCOT | T |
| R14009_38_3_19601 | K. DVLSVAFSTDNR. Q   | 1323.65393 | 0.0001   | 2 | 1 | 75.5  | 0 | 1.41E-09 | 0 | R14009_38 | 4.21 | 0 | 0 | 2 | MASCOT | T |
| R14009_38_3_19634 | K. DVLSVAFSTDNR. Q   | 1323.65393 | 0.00048  | 2 | 1 | 63.31 | 0 | 2.33E-08 | 0 | R14009_38 | 4.21 | 0 | 0 | 2 | MASCOT | T |
| R14009_38_3_19667 | K. DVLSVAFSTDNR. Q   | 1323.65393 | 0.00092  | 2 | 1 | 71.33 | 0 | 3.68E-09 | 0 | R14009_38 | 4.21 | 0 | 0 | 2 | MASCOT | T |
| R14009_38_3_19700 | K. DVLSVAFSTDNR. Q   | 1323.65393 | 0.00116  | 2 | 1 | 76.67 | 0 | 1.08E-09 | 0 | R14009_38 | 4.21 | 0 | 0 | 2 | MASCOT | T |
| R14009_38_3_19734 | K. DVLSVAFSTDNR. Q   | 1323.65393 | 0.00178  | 2 | 1 | 64.24 | 0 | 1.88E-08 | 0 | R14009_38 | 4.21 | 0 | 0 | 2 | MASCOT | T |
| R14009_38_3_19767 | K. DVLSVAFSTDNR. Q   | 1323.65393 | 0.00136  | 2 | 1 | 68.98 | 0 | 6.32E-09 | 0 | R14009_38 | 4.21 | 0 | 0 | 2 | MASCOT | T |
| R14009_38_3_19798 | K. DVLSVAFSTDNR. Q   | 1323.65393 | 0.00124  | 2 | 1 | 62.9  | 0 | 2.56E-08 | 0 | R14009_38 | 4.21 | 0 | 0 | 2 | MASCOT | T |
| R14009_38_3_19831 | K. DVLSVAFSTDNR. Q   | 1323.65393 | 0.0017   | 2 | 1 | 63.84 | 0 | 2.07E-08 | 0 | R14009_38 | 4.21 | 0 | 0 | 2 | MASCOT | T |
| R14009_38_3_19864 | K. DVLSVAFSTDNR. Q   | 1323.65393 | 0.00178  | 2 | 1 | 65.68 | 0 | 1.35E-08 | 0 | R14009_38 | 4.21 | 0 | 0 | 2 | MASCOT | T |
| R14009_38_3_19897 | K. DVLSVAFSTDNR. Q   | 1323.65393 | 0.0017   | 2 | 1 | 61.16 | 0 | 3.83E-08 | 0 | R14009_38 | 4.21 | 0 | 0 | 2 | MASCOT | T |
| R14009_38_3_19930 | K. DVLSVAFSTDNR. Q   | 1323.65393 | 0.00194  | 2 | 1 | 61.47 | 0 | 3.56E-08 | 0 | R14009_38 | 4.21 | 0 | 0 | 2 | MASCOT | T |
| R14009_38_3_19963 | K. DVLSVAFSTDNR. Q   | 1323.65393 | 0.00156  | 2 | 1 | 61.21 | 0 | 3.78E-08 | 0 | R14009_38 | 4.21 | 0 | 0 | 2 | MASCOT | T |
| R14009_38_3_19996 | K. DVLSVAFSTDNR. Q   | 1323.65393 | 0.00116  | 2 | 1 | 74.94 | 0 | 1.60E-09 | 0 | R14009_38 | 4.21 | 0 | 0 | 2 | MASCOT | T |
| R14009_38_3_20029 | K. DVLSVAFSTDNR. Q   | 1323.65393 | 0.00092  | 2 | 1 | 76.42 | 0 | 1.14E-09 | 0 | R14009_38 | 4.21 | 0 | 0 | 2 | MASCOT | T |
| R14009_38_3_20062 | K. DVLSVAFSTDNR. Q   | 1323.65393 | 0.00162  | 2 | 1 | 76.67 | 0 | 1.08E-09 | 0 | R14009_38 | 4.21 | 0 | 0 | 2 | MASCOT | T |
| R14009_38_3_20095 | K. DVLSVAFSTDNR. Q   | 1323.65393 | 0.00128  | 2 | 1 | 62.87 | 0 | 2.58E-08 | 0 | R14009_38 | 4.21 | 0 | 0 | 2 | MASCOT | T |
| R14009_38_3_20128 | K. DVLSVAFSTDNR. Q   | 1323.65393 | 0.00144  | 2 | 1 | 65.48 | 0 | 1.42E-08 | 0 | R14009_38 | 4.21 | 0 | 0 | 2 | MASCOT | T |

|                   |                    |            |          |   |   |       |   |          |     |           |      |   |   |   |        |   |
|-------------------|--------------------|------------|----------|---|---|-------|---|----------|-----|-----------|------|---|---|---|--------|---|
| R14009_38_3_20161 | K. DVLSVAFSTDNR. Q | 1323.65393 | 0.00126  | 2 | 1 | 63.36 | 0 | 2.31E-08 | 0 0 | R14009_38 | 4.21 | 0 | 0 | 2 | MASCOT | T |
| R14009_38_3_20195 | K. DVLSVAFSTDNR. Q | 1323.65393 | 0.0004   | 2 | 1 | 61.15 | 0 | 3.84E-08 | 0 0 | R14009_38 | 4.21 | 0 | 0 | 2 | MASCOT | T |
| R14009_38_3_20228 | K. DVLSVAFSTDNR. Q | 1323.65393 | 0.00046  | 2 | 1 | 65.72 | 0 | 1.34E-08 | 0 0 | R14009_38 | 4.21 | 0 | 0 | 2 | MASCOT | T |
| R14009_38_3_20262 | K. DVLSVAFSTDNR. Q | 1323.65393 | 0.00092  | 2 | 1 | 74.99 | 0 | 1.58E-09 | 0 0 | R14009_38 | 4.21 | 0 | 0 | 2 | MASCOT | T |
| R14009_38_3_20295 | K. DVLSVAFSTDNR. Q | 1323.65393 | 0.00036  | 2 | 1 | 68.98 | 0 | 6.32E-09 | 0 0 | R14009_38 | 4.21 | 0 | 0 | 2 | MASCOT | T |
| R14009_38_3_20329 | K. DVLSVAFSTDNR. Q | 1323.65393 | 0.001    | 2 | 1 | 74.97 | 0 | 1.59E-09 | 0 0 | R14009_38 | 4.21 | 0 | 0 | 2 | MASCOT | T |
| R14009_38_3_20364 | K. DVLSVAFSTDNR. Q | 1323.65393 | 0.00036  | 2 | 1 | 76.47 | 0 | 1.13E-09 | 0 0 | R14009_38 | 4.21 | 0 | 0 | 2 | MASCOT | T |
| R14009_38_3_20408 | K. DVLSVAFSTDNR. Q | 1323.65393 | 0.00054  | 2 | 1 | 82.08 | 0 | 3.10E-10 | 0 0 | R14009_38 | 4.21 | 0 | 0 | 2 | MASCOT | T |
| R14009_38_3_20449 | K. DVLSVAFSTDNR. Q | 1323.65393 | 0.00066  | 2 | 1 | 64.93 | 0 | 1.61E-08 | 0 0 | R14009_38 | 4.21 | 0 | 0 | 2 | MASCOT | T |
| R14009_38_3_20482 | K. DVLSVAFSTDNR. Q | 1323.65393 | 0.00042  | 2 | 1 | 71.35 | 0 | 3.66E-09 | 0 0 | R14009_38 | 4.21 | 0 | 0 | 2 | MASCOT | T |
| R14009_38_3_20516 | K. DVLSVAFSTDNR. Q | 1323.65393 | -0.00044 | 2 | 1 | 79.31 | 0 | 5.86E-10 | 0 0 | R14009_38 | 4.21 | 0 | 0 | 2 | MASCOT | T |
| R14009_38_3_20550 | K. DVLSVAFSTDNR. Q | 1323.65393 | 0.00076  | 2 | 1 | 75.41 | 0 | 1.44E-09 | 0 0 | R14009_38 | 4.21 | 0 | 0 | 2 | MASCOT | T |
| R14009_38_3_20638 | K. DVLSVAFSTDNR. Q | 1323.65393 | 0.0016   | 2 | 1 | 69.32 | 0 | 5.85E-09 | 0 0 | R14009_38 | 4.21 | 0 | 0 | 2 | MASCOT | T |
| R14009_38_3_20682 | K. DVLSVAFSTDNR. Q | 1323.65393 | 0.00252  | 2 | 1 | 64.15 | 0 | 1.92E-08 | 0 0 | R14009_38 | 4.21 | 0 | 0 | 2 | MASCOT | T |
| R14009_38_3_20726 | K. DVLSVAFSTDNR. Q | 1323.65393 | 0.00176  | 2 | 1 | 78.19 | 0 | 7.59E-10 | 0 0 | R14009_38 | 4.21 | 0 | 0 | 2 | MASCOT | T |
| R14009_38_3_20771 | K. DVLSVAFSTDNR. Q | 1323.65393 | 0.0017   | 2 | 1 | 78.14 | 0 | 7.67E-10 | 0 0 | R14009_38 | 4.21 | 0 | 0 | 2 | MASCOT | T |
| R14009_38_3_20816 | K. DVLSVAFSTDNR. Q | 1323.65393 | 0.00162  | 2 | 1 | 64.99 | 0 | 1.58E-08 | 0 0 | R14009_38 | 4.21 | 0 | 0 | 2 | MASCOT | T |
| R14009_38_3_20859 | K. DVLSVAFSTDNR. Q | 1323.65393 | 0.0009   | 2 | 1 | 67.16 | 0 | 9.62E-09 | 0 0 | R14009_38 | 4.21 | 0 | 0 | 2 | MASCOT | T |
| R14009_38_3_20913 | K. DVLSVAFSTDNR. Q | 1323.65393 | -0.00022 | 2 | 1 | 78.17 | 0 | 7.62E-10 | 0 0 | R14009_38 | 4.21 | 0 | 0 | 2 | MASCOT | T |
| R14009_38_3_21291 | K. DVLSVAFSTDNR. Q | 1323.65393 | -0.00144 | 2 | 1 | 76.71 | 0 | 1.07E-09 | 0 0 | R14009_38 | 4.21 | 0 | 0 | 2 | MASCOT | T |
| R14009_38_3_21365 | K. DVLSVAFSTDNR. Q | 1323.65393 | -0.00088 | 2 | 1 | 78.19 | 0 | 7.59E-10 | 0 0 | R14009_38 | 4.21 | 0 | 0 | 2 | MASCOT | T |
| R14009_38_3_21466 | K. DVLSVAFSTDNR. Q | 1323.65393 | -0.00044 | 2 | 1 | 71.73 | 0 | 3.36E-09 | 0 0 | R14009_38 | 4.21 | 0 | 0 | 2 | MASCOT | T |
| R14009_38_3_21510 | K. DVLSVAFSTDNR. Q | 1323.65393 | -0.00032 | 2 | 1 | 79.89 | 0 | 5.13E-10 | 0 0 | R14009_38 | 4.21 | 0 | 0 | 2 | MASCOT | T |
| R14009_38_3_21552 | K. DVLSVAFSTDNR. Q | 1323.65393 | 0.00024  | 2 | 1 | 70.67 | 0 | 4.29E-09 | 0 0 | R14009_38 | 4.21 | 0 | 0 | 2 | MASCOT | T |
| R14009_38_3_21595 | K. DVLSVAFSTDNR. Q | 1323.65393 | 0.00044  | 2 | 1 | 74.19 | 0 | 1.91E-09 | 0 0 | R14009_38 | 4.21 | 0 | 0 | 2 | MASCOT | T |
| R14009_38_3_21639 | K. DVLSVAFSTDNR. Q | 1323.65393 | 0.00022  | 2 | 1 | 71.88 | 0 | 3.24E-09 | 0 0 | R14009_38 | 4.21 | 0 | 0 | 2 | MASCOT | T |
| R14009_38_3_21685 | K. DVLSVAFSTDNR. Q | 1323.65393 | 0.00004  | 2 | 1 | 83.87 | 0 | 2.05E-10 | 0 0 | R14009_38 | 4.21 | 0 | 0 | 2 | MASCOT | T |
| R14009_38_3_21729 | K. DVLSVAFSTDNR. Q | 1323.65393 | 0.00038  | 2 | 1 | 67.92 | 0 | 8.07E-09 | 0 0 | R14009_38 | 4.21 | 0 | 0 | 2 | MASCOT | T |
| R14009_38_3_21774 | K. DVLSVAFSTDNR. Q | 1323.65393 | 0.00004  | 2 | 1 | 74.82 | 0 | 1.65E-09 | 0 0 | R14009_38 | 4.21 | 0 | 0 | 2 | MASCOT | T |
| R14009_38_3_21817 | K. DVLSVAFSTDNR. Q | 1323.65393 | -0.00012 | 2 | 1 | 73.02 | 0 | 2.49E-09 | 0 0 | R14009_38 | 4.21 | 0 | 0 | 2 | MASCOT | T |
| R14009_38_3_21861 | K. DVLSVAFSTDNR. Q | 1323.65393 | 0.00004  | 2 | 1 | 75.55 | 0 | 1.39E-09 | 0 0 | R14009_38 | 4.21 | 0 | 0 | 2 | MASCOT | T |
| R14009_38_3_21906 | K. DVLSVAFSTDNR. Q | 1323.65393 | 0.00062  | 2 | 1 | 66.46 | 0 | 1.13E-08 | 0 0 | R14009_38 | 4.21 | 0 | 0 | 2 | MASCOT | T |
| R14009_38_3_21950 | K. DVLSVAFSTDNR. Q | 1323.65393 | -0.00028 | 2 | 1 | 68.42 | 0 | 7.19E-09 | 0 0 | R14009_38 | 4.21 | 0 | 0 | 2 | MASCOT | T |
| R14009_38_3_21993 | K. DVLSVAFSTDNR. Q | 1323.65393 | -0.0003  | 2 | 1 | 78.42 | 0 | 7.19E-10 | 0 0 | R14009_38 | 4.21 | 0 | 0 | 2 | MASCOT | T |
| R14009_38_3_22036 | K. DVLSVAFSTDNR. Q | 1323.65393 | -0.00016 | 2 | 1 | 83.36 | 0 | 2.31E-10 | 0 0 | R14009_38 | 4.21 | 0 | 0 | 2 | MASCOT | T |
| R14009_38_3_22079 | K. DVLSVAFSTDNR. Q | 1323.65393 | 0.00056  | 2 | 1 | 81.27 | 0 | 3.73E-10 | 0 0 | R14009_38 | 4.21 | 0 | 0 | 2 | MASCOT | T |
| R14009_38_3_22123 | K. DVLSVAFSTDNR. Q | 1323.65393 | 0.0008   | 2 | 1 | 73.81 | 0 | 2.08E-09 | 0 0 | R14009_38 | 4.21 | 0 | 0 | 2 | MASCOT | T |
| R14009_38_3_22168 | K. DVLSVAFSTDNR. Q | 1323.65393 | 0.0002   | 2 | 1 | 81.79 | 0 | 3.31E-10 | 0 0 | R14009_38 | 4.21 | 0 | 0 | 2 | MASCOT | T |
| R14009_38_3_22212 | K. DVLSVAFSTDNR. Q | 1323.65393 | 0.00062  | 2 | 1 | 73.09 | 0 | 2.45E-09 | 0 0 | R14009_38 | 4.21 | 0 | 0 | 2 | MASCOT | T |
| R14009_38_3_22256 | K. DVLSVAFSTDNR. Q | 1323.65393 | 0.00014  | 2 | 1 | 76.39 | 0 | 1.15E-09 | 0 0 | R14009_38 | 4.21 | 0 | 0 | 2 | MASCOT | T |
| R14009_38_3_22301 | K. DVLSVAFSTDNR. Q | 1323.65393 | 0.00044  | 2 | 1 | 75.2  | 0 | 1.51E-09 | 0 0 | R14009_38 | 4.21 | 0 | 0 | 2 | MASCOT | T |
| R14009_38_3_22346 | K. DVLSVAFSTDNR. Q | 1323.65393 | 0.00028  | 2 | 1 | 85.74 | 0 | 1.33E-10 | 0 0 | R14009_38 | 4.21 | 0 | 0 | 2 | MASCOT | T |
| R14009_38_3_22389 | K. DVLSVAFSTDNR. Q | 1323.65393 | 0.00014  | 2 | 1 | 78.4  | 0 | 7.23E-10 | 0 0 | R14009_38 | 4.21 | 0 | 0 | 2 | MASCOT | T |
| R14009_38_3_22435 | K. DVLSVAFSTDNR. Q | 1323.65393 | -0.00044 | 2 | 1 | 73.36 | 0 | 2.31E-09 | 0 0 | R14009_38 | 4.21 | 0 | 0 | 2 | MASCOT | T |
| R14009_38_3_22480 | K. DVLSVAFSTDNR. Q | 1323.65393 | 0.00004  | 2 | 1 | 86.8  | 0 | 1.04E-10 | 0 0 | R14009_38 | 4.21 | 0 | 0 | 2 | MASCOT | T |
| R14009_38_3_22524 | K. DVLSVAFSTDNR. Q | 1323.65393 | -0.00012 | 2 | 1 | 74.11 | 0 | 1.94E-09 | 0 0 | R14009_38 | 4.21 | 0 | 0 | 2 | MASCOT | T |
| R14009_38_3_22566 | K. DVLSVAFSTDNR. Q | 1323.65393 | -0.00022 | 2 | 1 | 85.82 | 0 | 1.31E-10 | 0 0 | R14009_38 | 4.21 | 0 | 0 | 2 | MASCOT | T |
| R14009_38_3_22610 | K. DVLSVAFSTDNR. Q | 1323.65393 | -0.00086 | 2 | 1 | 70.7  | 0 | 4.26E-09 | 0 0 | R14009_38 | 4.21 | 0 | 0 | 2 | MASCOT | T |
| R14009_38_3_22653 | K. DVLSVAFSTDNR. Q | 1323.65393 | 0        | 2 | 1 | 78.82 | 0 | 6.56E-10 | 0 0 | R14009_38 | 4.21 | 0 | 0 | 2 | MASCOT | T |
| R14009_38_3_22698 | K. DVLSVAFSTDNR. Q | 1323.65393 | 0.00036  | 2 | 1 | 70.73 | 0 | 4.23E-09 | 0 0 | R14009_38 | 4.21 | 0 | 0 | 2 | MASCOT | T |
| R14009_38_3_22741 | K. DVLSVAFSTDNR. Q | 1323.65393 | 0.00036  | 2 | 1 | 72.63 | 0 | 2.73E-09 | 0 0 | R14009_38 | 4.21 | 0 | 0 | 2 | MASCOT | T |
| R14009_38_3_22785 | K. DVLSVAFSTDNR. Q | 1323.65393 | -0.00008 | 2 | 1 | 79.28 | 0 | 5.90E-10 | 0 0 | R14009_38 | 4.21 | 0 | 0 | 2 | MASCOT | T |
| R14009_38_3_22830 | K. DVLSVAFSTDNR. Q | 1323.65393 | 0.00046  | 2 | 1 | 70.78 | 0 | 4.18E-09 | 0 0 | R14009_38 | 4.21 | 0 | 0 | 2 | MASCOT | T |
| R14009_38_3_22875 | K. DVLSVAFSTDNR. Q | 1323.65393 | -0.0007  | 2 | 1 | 64.62 | 0 | 1.73E-08 | 0 0 | R14009_38 | 4.21 | 0 | 0 | 2 | MASCOT | T |
| R14009_38_3_22920 | K. DVLSVAFSTDNR. Q | 1323.65393 | -0.00002 | 2 | 1 | 95.65 | 0 | 1.36E-11 | 0 0 | R14009_38 | 4.21 | 0 | 0 | 2 | MASCOT | T |
| R14009_38_3_22962 | K. DVLSVAFSTDNR. Q | 1323.65393 | 0.00038  | 2 | 1 | 73.11 | 0 | 2.44E-09 | 0 0 | R14009_38 | 4.21 | 0 | 0 | 2 | MASCOT | T |
| R14009_38_3_23344 | K. DVLSVAFSTDNR. Q | 1323.65393 | 0.00208  | 2 | 1 | 74.47 | 0 | 1.79E-09 | 0 0 | R14009_38 | 4.21 | 0 | 0 | 2 | MASCOT | T |
| R14009_38_3_23403 | K. DVLSVAFSTDNR. Q | 1323.65393 | 0.00164  | 2 | 1 | 78.81 | 0 | 6.58E-10 | 0 0 | R14009_38 | 4.21 | 0 | 0 | 2 | MASCOT | T |
| R14009_38_3_23445 | K. DVLSVAFSTDNR. Q | 1323.65393 | 0.00186  | 2 | 1 | 66.73 | 0 | 1.06E-08 | 0 0 | R14009_38 | 4.21 | 0 | 0 | 2 | MASCOT | T |
| R14009_38_3_23490 | K. DVLSVAFSTDNR. Q | 1323.65393 | 0.00046  | 2 | 1 | 83.63 | 0 | 2.17E-10 | 0 0 | R14009_38 | 4.21 | 0 | 0 | 2 | MASCOT | T |
| R14009_38_3_23532 | K. DVLSVAFSTDNR. Q | 1323.65393 | -0.00024 | 2 | 1 | 85.39 | 0 | 1.45E-10 | 0 0 | R14009_38 | 4.21 | 0 | 0 | 2 | MASCOT | T |
| R14009_38_3_23578 | K. DVLSVAFSTDNR. Q | 1323.65393 | 0.00002  | 2 | 1 | 70.98 | 0 | 3.99E-09 | 0 0 | R14009_38 | 4.21 | 0 | 0 | 2 | MASCOT | T |
| R14009_38_3_23623 | K. DVLSVAFSTDNR. Q | 1323.65393 | 0.00026  | 2 | 1 | 81.21 | 0 | 3.78E-10 | 0 0 | R14009_38 | 4.21 | 0 | 0 | 2 | MASCOT | T |
| R14009_38_3_23675 | K. DVLSVAFSTDNR. Q | 1323.65393 | 0.00024  | 2 | 1 | 84.78 | 0 | 1.66E-10 | 0 0 | R14009_38 | 4.21 | 0 | 0 | 2 | MASCOT | T |
| R14009_38_3_23720 | K. DVLSVAFSTDNR. Q | 1323.65393 | 0.00062  | 2 | 1 | 77.2  | 0 | 9.53E-10 | 0 0 | R14009_38 | 4.21 | 0 | 0 | 2 | MASCOT | T |
| R14009_38_3_23767 | K. DVLSVAFSTDNR. Q | 1323.65393 | 0.00016  | 2 | 1 | 87.8  | 0 | 8.30E-11 | 0 0 | R14009_38 | 4.21 | 0 | 0 | 2 | MASCOT | T |
| R14009_38_3_23809 | K. DVLSVAFSTDNR. Q | 1323.65393 | -0.00004 | 2 | 1 | 85.82 | 0 | 1.31E-10 | 0 0 | R14009_38 | 4.21 | 0 | 0 | 2 | MASCOT | T |
| R14009_38_3_23855 | K. DVLSVAFSTDNR. Q | 1323.65393 | -0.00118 | 2 | 1 | 81.38 | 0 | 3.64E-10 | 0 0 | R14009_38 | 4.21 | 0 | 0 | 2 | MASCOT | T |
| R14009_38_3_23898 | K. DVLSVAFSTDNR. Q | 1323.65393 | -0.00074 | 2 | 1 | 78.62 | 0 | 6.87E-10 | 0 0 | R14009_38 | 4.21 | 0 | 0 | 2 | MASCOT | T |
| R14009_38_3_23942 | K. DVLSVAFSTDNR. Q | 1323.65393 | 0.0005   | 2 | 1 | 74.02 | 0 | 1.98E-09 | 0 0 | R14009_38 | 4.21 | 0 | 0 | 2 | MASCOT | T |
| R14009_38_3_23987 | K. DVLSVAFSTDNR. Q | 1323.65393 | -0.00044 | 2 | 1 | 71.63 | 0 | 3.44E-09 | 0 0 | R14009_38 | 4.21 | 0 | 0 | 2 | MASCOT | T |
| R14009_38_3_24064 | K. DVLSVAFSTDNR. Q | 1323.65393 | -0.00056 | 2 | 1 | 66.92 | 0 | 1.02E-08 | 0 0 | R14009_38 | 4.21 | 0 | 0 | 2 | MASCOT | T |
| R14009_38_3_24102 | K. DVLSVAFSTDNR. Q | 1323.65393 | 0.00014  | 2 | 1 | 66.04 | 0 | 1.24E-08 | 0 0 | R14009_38 | 4.21 | 0 | 0 | 2 | MASCOT | T |

|                   |                    |            |          |   |   |       |   |          |     |           |      |   |   |   |        |   |
|-------------------|--------------------|------------|----------|---|---|-------|---|----------|-----|-----------|------|---|---|---|--------|---|
| R14009_38_3_24139 | K. DVLSVAFSTDNR. Q | 1323.65393 | -0.00012 | 2 | 1 | 46.12 | 0 | 1.22E-06 | 0 0 | R14009_38 | 4.21 | 0 | 0 | 2 | MASCOT | T |
| R14009_38_3_24183 | K. DVLSVAFSTDNR. Q | 1323.65393 | 0.00022  | 2 | 1 | 57.67 | 0 | 8.55E-08 | 0 0 | R14009_38 | 4.21 | 0 | 0 | 2 | MASCOT | T |
| R14009_38_3_24227 | K. DVLSVAFSTDNR. Q | 1323.65393 | -0.00006 | 2 | 1 | 88.36 | 0 | 7.29E-11 | 0 0 | R14009_38 | 4.21 | 0 | 0 | 2 | MASCOT | T |
| R14009_38_3_24268 | K. DVLSVAFSTDNR. Q | 1323.65393 | -0.00058 | 2 | 1 | 53.25 | 0 | 2.37E-07 | 0 0 | R14009_38 | 4.21 | 0 | 0 | 2 | MASCOT | T |
| R14009_38_3_24315 | K. DVLSVAFSTDNR. Q | 1323.65393 | 0.00014  | 2 | 1 | 76.97 | 0 | 1.00E-09 | 0 0 | R14009_38 | 4.21 | 0 | 0 | 2 | MASCOT | T |
| R14009_38_3_24360 | K. DVLSVAFSTDNR. Q | 1323.65393 | 0.00006  | 2 | 1 | 62    | 0 | 3.15E-08 | 0 0 | R14009_38 | 4.21 | 0 | 0 | 2 | MASCOT | T |
| R14009_38_3_24404 | K. DVLSVAFSTDNR. Q | 1323.65393 | 0        | 2 | 1 | 61.38 | 0 | 3.64E-08 | 0 0 | R14009_38 | 4.21 | 0 | 0 | 2 | MASCOT | T |
| R14009_38_3_24448 | K. DVLSVAFSTDNR. Q | 1323.65393 | -0.00108 | 2 | 1 | 65.56 | 0 | 1.39E-08 | 0 0 | R14009_38 | 4.21 | 0 | 0 | 2 | MASCOT | T |
| R14009_38_3_24492 | K. DVLSVAFSTDNR. Q | 1323.65393 | -0.0013  | 2 | 1 | 51.18 | 0 | 3.81E-07 | 0 0 | R14009_38 | 4.21 | 0 | 0 | 2 | MASCOT | T |
| R14009_38_3_24532 | K. DVLSVAFSTDNR. Q | 1323.65393 | -0.00096 | 2 | 1 | 74.04 | 0 | 1.97E-09 | 0 0 | R14009_38 | 4.21 | 0 | 0 | 2 | MASCOT | T |
| R14009_38_3_24580 | K. DVLSVAFSTDNR. Q | 1323.65393 | 0.00056  | 2 | 1 | 59.47 | 0 | 5.65E-08 | 0 0 | R14009_38 | 4.21 | 0 | 0 | 2 | MASCOT | T |
| R14009_38_3_24623 | K. DVLSVAFSTDNR. Q | 1323.65393 | 0        | 2 | 1 | 63.38 | 0 | 2.30E-08 | 0 0 | R14009_38 | 4.21 | 0 | 0 | 2 | MASCOT | T |
| R14009_38_3_24667 | K. DVLSVAFSTDNR. Q | 1323.65393 | -0.00018 | 2 | 1 | 62.72 | 0 | 2.67E-08 | 0 0 | R14009_38 | 4.21 | 0 | 0 | 2 | MASCOT | T |
| R14009_38_3_24710 | K. DVLSVAFSTDNR. Q | 1323.65393 | 0.00048  | 2 | 1 | 45.77 | 0 | 1.32E-06 | 0 0 | R14009_38 | 4.21 | 0 | 0 | 2 | MASCOT | T |
| R14009_38_3_24754 | K. DVLSVAFSTDNR. Q | 1323.65393 | 0.00228  | 2 | 1 | 60.07 | 0 | 4.92E-08 | 0 0 | R14009_38 | 4.21 | 0 | 0 | 2 | MASCOT | T |
| R14009_38_3_24798 | K. DVLSVAFSTDNR. Q | 1323.65393 | 0.0011   | 2 | 1 | 60.87 | 0 | 4.09E-08 | 0 0 | R14009_38 | 4.21 | 0 | 0 | 2 | MASCOT | T |
| R14009_38_3_24842 | K. DVLSVAFSTDNR. Q | 1323.65393 | 0.00098  | 2 | 1 | 71.89 | 0 | 3.24E-09 | 0 0 | R14009_38 | 4.21 | 0 | 0 | 2 | MASCOT | T |
| R14009_38_3_24885 | K. DVLSVAFSTDNR. Q | 1323.65393 | -0.00024 | 2 | 1 | 55.66 | 0 | 1.36E-07 | 0 0 | R14009_38 | 4.21 | 0 | 0 | 2 | MASCOT | T |
| R14009_38_3_24932 | K. DVLSVAFSTDNR. Q | 1323.65393 | 0.00054  | 2 | 1 | 68.97 | 0 | 6.34E-09 | 0 0 | R14009_38 | 4.21 | 0 | 0 | 2 | MASCOT | T |
| R14009_38_3_24975 | K. DVLSVAFSTDNR. Q | 1323.65393 | -0.00032 | 2 | 1 | 66.04 | 0 | 1.24E-08 | 0 0 | R14009_38 | 4.21 | 0 | 0 | 2 | MASCOT | T |
| R14009_38_3_25017 | K. DVLSVAFSTDNR. Q | 1323.65393 | -0.00088 | 2 | 1 | 54.42 | 0 | 1.81E-07 | 0 0 | R14009_38 | 4.21 | 0 | 0 | 2 | MASCOT | T |
| R14009_38_3_25061 | K. DVLSVAFSTDNR. Q | 1323.65393 | -0.00082 | 2 | 1 | 58.79 | 0 | 6.61E-08 | 0 0 | R14009_38 | 4.21 | 0 | 0 | 2 | MASCOT | T |
| R14009_38_3_25105 | K. DVLSVAFSTDNR. Q | 1323.65393 | -0.00026 | 2 | 1 | 63.42 | 0 | 2.27E-08 | 0 0 | R14009_38 | 4.21 | 0 | 0 | 2 | MASCOT | T |
| R14009_38_3_25150 | K. DVLSVAFSTDNR. Q | 1323.65393 | -0.00062 | 2 | 1 | 51.18 | 0 | 3.81E-07 | 0 0 | R14009_38 | 4.21 | 0 | 0 | 2 | MASCOT | T |
| R14009_38_3_25193 | K. DVLSVAFSTDNR. Q | 1323.65393 | -0.0006  | 2 | 1 | 76.67 | 0 | 1.08E-09 | 0 0 | R14009_38 | 4.21 | 0 | 0 | 2 | MASCOT | T |
| R14009_38_3_25236 | K. DVLSVAFSTDNR. Q | 1323.65393 | -0.00094 | 2 | 1 | 54.02 | 0 | 1.98E-07 | 0 0 | R14009_38 | 4.21 | 0 | 0 | 2 | MASCOT | T |
| R14009_38_3_25280 | K. DVLSVAFSTDNR. Q | 1323.65393 | 0.00022  | 2 | 1 | 68.04 | 0 | 7.85E-09 | 0 0 | R14009_38 | 4.21 | 0 | 0 | 2 | MASCOT | T |
| R14009_38_3_25325 | K. DVLSVAFSTDNR. Q | 1323.65393 | -0.0003  | 2 | 1 | 53.18 | 0 | 2.40E-07 | 0 0 | R14009_38 | 4.21 | 0 | 0 | 2 | MASCOT | T |
| R14009_38_3_25370 | K. DVLSVAFSTDNR. Q | 1323.65393 | 0.00022  | 2 | 1 | 81.92 | 0 | 3.21E-10 | 0 0 | R14009_38 | 4.21 | 0 | 0 | 2 | MASCOT | T |
| R14009_38_3_25414 | K. DVLSVAFSTDNR. Q | 1323.65393 | 0.00036  | 2 | 1 | 41.75 | 0 | 3.34E-06 | 0 0 | R14009_38 | 4.21 | 0 | 0 | 2 | MASCOT | T |
| R14009_38_3_25457 | K. DVLSVAFSTDNR. Q | 1323.65393 | 0.00014  | 2 | 1 | 51.02 | 0 | 3.95E-07 | 0 0 | R14009_38 | 4.21 | 0 | 0 | 2 | MASCOT | T |
| R14009_38_3_25502 | K. DVLSVAFSTDNR. Q | 1323.65393 | -0.00022 | 2 | 1 | 62.73 | 0 | 2.67E-08 | 0 0 | R14009_38 | 4.21 | 0 | 0 | 2 | MASCOT | T |
| R14009_38_3_25545 | K. DVLSVAFSTDNR. Q | 1323.65393 | -0.00074 | 2 | 1 | 56.29 | 0 | 1.17E-07 | 0 0 | R14009_38 | 4.21 | 0 | 0 | 2 | MASCOT | T |
| R14009_38_3_25588 | K. DVLSVAFSTDNR. Q | 1323.65393 | -0.00068 | 2 | 1 | 66.03 | 0 | 1.25E-08 | 0 0 | R14009_38 | 4.21 | 0 | 0 | 2 | MASCOT | T |
| R14009_38_3_25632 | K. DVLSVAFSTDNR. Q | 1323.65393 | -0.00052 | 2 | 1 | 61.62 | 0 | 3.44E-08 | 0 0 | R14009_38 | 4.21 | 0 | 0 | 2 | MASCOT | T |
| R14009_38_3_25676 | K. DVLSVAFSTDNR. Q | 1323.65393 | -0.00038 | 2 | 1 | 55.28 | 0 | 1.48E-07 | 0 0 | R14009_38 | 4.21 | 0 | 0 | 2 | MASCOT | T |
| R14009_38_3_25721 | K. DVLSVAFSTDNR. Q | 1323.65393 | -0.00032 | 2 | 1 | 56.78 | 0 | 1.05E-07 | 0 0 | R14009_38 | 4.21 | 0 | 0 | 2 | MASCOT | T |
| R14009_38_3_25767 | K. DVLSVAFSTDNR. Q | 1323.65393 | -0.00042 | 2 | 1 | 64.97 | 0 | 1.59E-08 | 0 0 | R14009_38 | 4.21 | 0 | 0 | 2 | MASCOT | T |
| R14009_38_3_25811 | K. DVLSVAFSTDNR. Q | 1323.65393 | -0.00046 | 2 | 1 | 52.39 | 0 | 2.88E-07 | 0 0 | R14009_38 | 4.21 | 0 | 0 | 2 | MASCOT | T |
| R14009_38_3_25854 | K. DVLSVAFSTDNR. Q | 1323.65393 | -0.00004 | 2 | 1 | 55.35 | 0 | 1.46E-07 | 0 0 | R14009_38 | 4.21 | 0 | 0 | 2 | MASCOT | T |
| R14009_38_3_25908 | K. DVLSVAFSTDNR. Q | 1323.65393 | -0.00022 | 2 | 1 | 65.93 | 0 | 1.28E-08 | 0 0 | R14009_38 | 4.21 | 0 | 0 | 2 | MASCOT | T |
| R14009_38_3_25955 | K. DVLSVAFSTDNR. Q | 1323.65393 | 0.00074  | 2 | 1 | 50.48 | 0 | 4.48E-07 | 0 0 | R14009_38 | 4.21 | 0 | 0 | 2 | MASCOT | T |
| R14009_38_3_25999 | K. DVLSVAFSTDNR. Q | 1323.65393 | 0.00176  | 2 | 1 | 67.22 | 0 | 9.48E-09 | 0 0 | R14009_38 | 4.21 | 0 | 0 | 2 | MASCOT | T |
| R14009_38_3_26043 | K. DVLSVAFSTDNR. Q | 1323.65393 | 0.0017   | 2 | 1 | 58.26 | 0 | 7.46E-08 | 0 0 | R14009_38 | 4.21 | 0 | 0 | 2 | MASCOT | T |
| R14009_38_3_26086 | K. DVLSVAFSTDNR. Q | 1323.65393 | -0.00468 | 2 | 1 | 67.14 | 0 | 9.66E-09 | 0 0 | R14009_38 | 4.21 | 0 | 0 | 2 | MASCOT | T |
| R14009_38_3_26131 | K. DVLSVAFSTDNR. Q | 1323.65393 | -0.01832 | 2 | 1 | 77.98 | 0 | 7.96E-10 | 0 0 | R14009_38 | 4.21 | 0 | 0 | 2 | MASCOT | T |
| R14009_38_3_26173 | K. DVLSVAFSTDNR. Q | 1323.65393 | -0.01724 | 2 | 1 | 55.21 | 0 | 1.51E-07 | 0 0 | R14009_38 | 4.21 | 0 | 0 | 2 | MASCOT | T |
| R14009_38_3_26218 | K. DVLSVAFSTDNR. Q | 1323.65393 | -0.01888 | 2 | 1 | 65.19 | 0 | 1.51E-08 | 0 0 | R14009_38 | 4.21 | 0 | 0 | 2 | MASCOT | T |
| R14009_38_3_26262 | K. DVLSVAFSTDNR. Q | 1323.65393 | -0.02374 | 2 | 1 | 76.1  | 0 | 1.23E-09 | 0 0 | R14009_38 | 4.21 | 0 | 0 | 2 | MASCOT | T |
| R14009_38_3_26307 | K. DVLSVAFSTDNR. Q | 1323.65393 | -0.023   | 2 | 1 | 52.42 | 0 | 2.86E-07 | 0 0 | R14009_38 | 4.21 | 0 | 0 | 2 | MASCOT | T |
| R14009_38_3_26348 | K. DVLSVAFSTDNR. Q | 1323.65393 | -0.02366 | 2 | 1 | 59.97 | 0 | 5.03E-08 | 0 0 | R14009_38 | 4.21 | 0 | 0 | 2 | MASCOT | T |
| R14009_38_3_26392 | K. DVLSVAFSTDNR. Q | 1323.65393 | -0.02468 | 2 | 1 | 54.34 | 0 | 1.84E-07 | 0 0 | R14009_38 | 4.21 | 0 | 0 | 2 | MASCOT | T |
| R14009_38_3_26438 | K. DVLSVAFSTDNR. Q | 1323.65393 | -0.02428 | 2 | 1 | 68.67 | 0 | 6.79E-09 | 0 0 | R14009_38 | 4.21 | 0 | 0 | 2 | MASCOT | T |
| R14009_38_3_26480 | K. DVLSVAFSTDNR. Q | 1323.65393 | -0.0194  | 2 | 1 | 56.88 | 0 | 1.03E-07 | 0 0 | R14009_38 | 4.21 | 0 | 0 | 2 | MASCOT | T |
| R14009_38_3_26612 | K. DVLSVAFSTDNR. Q | 1323.65393 | -0.0256  | 2 | 1 | 56.44 | 0 | 1.13E-07 | 0 0 | R14009_38 | 4.21 | 0 | 0 | 2 | MASCOT | T |
| R14009_38_3_26670 | K. DVLSVAFSTDNR. Q | 1323.65393 | -0.02474 | 2 | 1 | 45.12 | 0 | 1.54E-06 | 0 0 | R14009_38 | 4.21 | 0 | 0 | 2 | MASCOT | T |
| R14009_38_3_26724 | K. DVLSVAFSTDNR. Q | 1323.65393 | -0.02248 | 2 | 1 | 40.03 | 0 | 4.97E-06 | 0 0 | R14009_38 | 4.21 | 0 | 0 | 2 | MASCOT | T |
| R14009_38_3_26765 | K. DVLSVAFSTDNR. Q | 1323.65393 | -0.02296 | 2 | 1 | 45.61 | 0 | 1.37E-06 | 0 0 | R14009_38 | 4.21 | 0 | 0 | 2 | MASCOT | T |
| R14009_38_3_26806 | K. DVLSVAFSTDNR. Q | 1323.65393 | -0.01484 | 2 | 1 | 57.13 | 0 | 9.68E-08 | 0 0 | R14009_38 | 4.21 | 0 | 0 | 2 | MASCOT | T |
| R14009_38_3_26842 | K. DVLSVAFSTDNR. Q | 1323.65393 | -0.00532 | 2 | 1 | 55.79 | 0 | 1.32E-07 | 0 0 | R14009_38 | 4.21 | 0 | 0 | 2 | MASCOT | T |
| R14009_38_3_26888 | K. DVLSVAFSTDNR. Q | 1323.65393 | -0.0029  | 2 | 1 | 70.45 | 0 | 4.51E-09 | 0 0 | R14009_38 | 4.21 | 0 | 0 | 2 | MASCOT | T |
| R14009_38_3_26932 | K. DVLSVAFSTDNR. Q | 1323.65393 | -0.00266 | 2 | 1 | 41.68 | 0 | 3.40E-06 | 0 0 | R14009_38 | 4.21 | 0 | 0 | 2 | MASCOT | T |
| R14009_38_3_26972 | K. DVLSVAFSTDNR. Q | 1323.65393 | 0.002    | 2 | 1 | 42.34 | 0 | 2.92E-06 | 0 0 | R14009_38 | 4.21 | 0 | 0 | 2 | MASCOT | T |
| R14009_38_3_27018 | K. DVLSVAFSTDNR. Q | 1323.65393 | -0.0052  | 2 | 1 | 55.61 | 0 | 1.37E-07 | 0 0 | R14009_38 | 4.21 | 0 | 0 | 2 | MASCOT | T |
| R14009_38_3_27061 | K. DVLSVAFSTDNR. Q | 1323.65393 | -0.00414 | 2 | 1 | 64.78 | 0 | 1.66E-08 | 0 0 | R14009_38 | 4.21 | 0 | 0 | 2 | MASCOT | T |
| R14009_38_3_27106 | K. DVLSVAFSTDNR. Q | 1323.65393 | -0.00512 | 2 | 1 | 58.5  | 0 | 7.06E-08 | 0 0 | R14009_38 | 4.21 | 0 | 0 | 2 | MASCOT | T |
| R14009_38_3_27151 | K. DVLSVAFSTDNR. Q | 1323.65393 | -0.0049  | 2 | 1 | 61.38 | 0 | 3.64E-08 | 0 0 | R14009_38 | 4.21 | 0 | 0 | 2 | MASCOT | T |
| R14009_38_3_27193 | K. DVLSVAFSTDNR. Q | 1323.65393 | 0.00158  | 2 | 1 | 55.07 | 0 | 1.56E-07 | 0 0 | R14009_38 | 4.21 | 0 | 0 | 2 | MASCOT | T |
| R14009_38_3_27236 | K. DVLSVAFSTDNR. Q | 1323.65393 | 0.00266  | 2 | 1 | 44.32 | 0 | 1.85E-06 | 0 0 | R14009_38 | 4.21 | 0 | 0 | 2 | MASCOT | T |
| R14009_38_3_27284 | K. DVLSVAFSTDNR. Q | 1323.65393 | 0.00198  | 2 | 1 | 58.53 | 0 | 7.01E-08 | 0 0 | R14009_38 | 4.21 | 0 | 0 | 2 | MASCOT | T |
| R14009_38_3_27327 | K. DVLSVAFSTDNR. Q | 1323.65393 | 0.00102  | 2 | 1 | 65.8  | 0 | 1.32E-08 | 0 0 | R14009_38 | 4.21 | 0 | 0 | 2 | MASCOT | T |
| R14009_38_3_27370 | K. DVLSVAFSTDNR. Q | 1323.65393 | 0.00036  | 2 | 1 | 49.32 | 0 | 5.85E-07 | 0 0 | R14009_38 | 4.21 | 0 | 0 | 2 | MASCOT | T |
| R14009_38_3_27545 | K. DVLSVAFSTDNR. Q | 1323.65393 | 0.00064  | 2 | 1 | 44.5  | 0 | 1.77E-06 | 0 0 | R14009_38 | 4.21 | 0 | 0 | 2 | MASCOT | T |

|                   |                        |            |          |   |   |        |   |          |     |           |      |   |            |           |   |        |        |   |
|-------------------|------------------------|------------|----------|---|---|--------|---|----------|-----|-----------|------|---|------------|-----------|---|--------|--------|---|
| R14009_38_3_27587 | K. DVLSVAFSTDNR. Q     | 1323.65393 | 0.00008  | 2 | 1 | 48.89  | 0 | 6.46E-07 | 0 0 | R14009_38 | 4.21 | 0 |            |           | 2 | MASCOT | T      |   |
| R14009_38_3_27634 | K. DVLSVAFSTDNR. Q     | 1323.65393 | -0.0005  | 2 | 1 | 59.48  | 0 | 5.64E-08 | 0 0 | R14009_38 | 4.21 | 0 |            |           | 2 | MASCOT | T      |   |
| R14009_38_3_27678 | K. DVLSVAFSTDNR. Q     | 1323.65393 | -0.00042 | 2 | 1 | 55.81  | 0 | 1.31E-07 | 0 0 | R14009_38 | 4.21 | 0 |            |           | 2 | MASCOT | T      |   |
| R14009_38_3_27718 | K. DVLSVAFSTDNR. Q     | 1323.65393 | 0.00036  | 2 | 1 | 52.98  | 0 | 2.52E-07 | 0 0 | R14009_38 | 4.21 | 0 |            |           | 2 | MASCOT | T      |   |
| R14009_38_3_27755 | K. DVLSVAFSTDNR. Q     | 1323.65393 | -0.00074 | 2 | 1 | 47.24  | 0 | 9.44E-07 | 0 0 | R14009_38 | 4.21 | 0 |            |           | 2 | MASCOT | T      |   |
| R14009_38_3_27800 | K. DVLSVAFSTDNR. Q     | 1323.65393 | -0.00004 | 2 | 1 | 41.84  | 0 | 3.27E-06 | 0 0 | R14009_38 | 4.21 | 0 |            |           | 2 | MASCOT | T      |   |
| R14009_38_3_27842 | K. DVLSVAFSTDNR. Q     | 1323.65393 | -0.00114 | 2 | 1 | 62.15  | 0 | 3.05E-08 | 0 0 | R14009_38 | 4.21 | 0 |            |           | 2 | MASCOT | T      |   |
| R14009_38_3_27896 | K. DVLSVAFSTDNR. Q     | 1323.65393 | 0.0003   | 2 | 1 | 33.13  | 0 | 2.43E-05 | 0 0 | R14009_38 | 4.21 | 0 |            |           | 2 | MASCOT | T      |   |
| R14009_38_3_27943 | K. DVLSVAFSTDNR. Q     | 1323.65393 | -0.00012 | 2 | 1 | 45.88  | 0 | 1.29E-06 | 0 0 | R14009_38 | 4.21 | 0 |            |           | 2 | MASCOT | T      |   |
| R14009_38_3_27985 | K. DVLSVAFSTDNR. Q     | 1323.65393 | 0.00074  | 2 | 1 | 53     | 0 | 2.51E-07 | 0 0 | R14009_38 | 4.21 | 0 |            |           | 2 | MASCOT | T      |   |
| R14009_38_3_28032 | K. DVLSVAFSTDNR. Q     | 1323.65393 | 0.0037   | 2 | 1 | 46.57  | 0 | 1.10E-06 | 0 0 | R14009_38 | 4.21 | 0 |            |           | 2 | MASCOT | T      |   |
| R14009_38_3_6731  | K. EDK#SYGVAQR. R      | 1478.68699 | 0.00141  | 2 | 1 | 61.16  | 0 | 3.83E-08 | 0 0 | R14009_38 | 6.17 | 1 | 326.122635 | pQTGG (K) | 0 | 2      | MASCOT | T |
| R14009_38_3_6773  | K. EDK#SYGVAQR. R      | 1478.68699 | 0.00065  | 2 | 1 | 78.36  | 0 | 7.29E-10 | 0 0 | R14009_38 | 6.17 | 1 | 326.122635 | pQTGG (K) | 0 | 2      | MASCOT | T |
| R14009_38_3_6815  | K. EDK#SYGVAQR. R      | 1478.68699 | 0.00089  | 2 | 1 | 50.56  | 0 | 4.40E-07 | 0 0 | R14009_38 | 6.17 | 1 | 326.122635 | pQTGG (K) | 0 | 2      | MASCOT | T |
| R14009_38_3_6850  | K. EDK#SYGVAQR. R      | 1478.68699 | 0.00051  | 2 | 1 | 45.11  | 0 | 1.54E-06 | 0 0 | R14009_38 | 6.17 | 1 | 326.122635 | pQTGG (K) | 0 | 2      | MASCOT | T |
| R14009_38_3_4637  | K. EDK#SYGVAQR. R      | 1495.71354 | -0.00398 | 2 | 1 | 29.15  | 0 | 6.08E-05 | 0 0 | R14009_38 | 6.17 | 1 | 343.149185 | QTGG (K)  | 0 | 2      | MASCOT | T |
| R14009_38_3_4669  | K. EDK#SYGVAQR. R      | 1495.71354 | -0.00134 | 2 | 1 | 34.35  | 0 | 1.84E-05 | 0 0 | R14009_38 | 6.17 | 1 | 343.149185 | QTGG (K)  | 0 | 2      | MASCOT | T |
| R14009_38_3_4701  | K. EDK#SYGVAQR. R      | 1495.71354 | 0.00062  | 2 | 1 | 34.55  | 0 | 1.75E-05 | 0 0 | R14009_38 | 6.17 | 1 | 343.149185 | QTGG (K)  | 0 | 2      | MASCOT | T |
| R14009_38_3_4737  | K. EDK#SYGVAQR. R      | 1495.71354 | 0.00048  | 2 | 1 | 48.31  | 0 | 7.38E-07 | 0 0 | R14009_38 | 6.17 | 1 | 343.149185 | QTGG (K)  | 0 | 2      | MASCOT | T |
| R14009_38_3_3680  | K. EDKSYGVAQR. R       | 1152.56436 | 0.00045  | 2 | 1 | 42.62  | 0 | 2.74E-06 | 0 0 | R14009_38 | 6.17 | 1 |            |           | 0 | 2      | MASCOT | T |
| R14009_38_3_3693  | K. EDKSYGVAQR. R       | 1152.56436 | 0.00053  | 3 | 1 | 30.57  | 0 | 4.39E-05 | 0 0 | R14009_38 | 6.17 | 1 |            |           | 0 | 2      | MASCOT | T |
| R14009_38_3_3712  | K. EDKSYGVAQR. R       | 1152.56436 | 0.00033  | 2 | 1 | 61.81  | 0 | 3.30E-08 | 0 0 | R14009_38 | 6.17 | 1 |            |           | 0 | 2      | MASCOT | T |
| R14009_38_3_3737  | K. EDKSYGVAQR. R       | 1152.56436 | 0.00029  | 3 | 1 | 37.29  | 0 | 9.33E-06 | 0 0 | R14009_38 | 6.17 | 1 |            |           | 0 | 2      | MASCOT | T |
| R14009_38_3_3745  | K. EDKSYGVAQR. R       | 1152.56436 | 0.00027  | 2 | 1 | 48.85  | 0 | 6.52E-07 | 0 0 | R14009_38 | 6.17 | 1 |            |           | 0 | 2      | MASCOT | T |
| R14009_38_3_3778  | K. EDKSYGVAQR. R       | 1152.56436 | 0.00037  | 2 | 1 | 60.37  | 0 | 4.59E-08 | 0 0 | R14009_38 | 6.17 | 1 |            |           | 0 | 2      | MASCOT | T |
| R14009_38_3_3783  | K. EDKSYGVAQR. R       | 1152.56436 | 0.00029  | 3 | 1 | 37.31  | 0 | 9.29E-06 | 0 0 | R14009_38 | 6.17 | 1 |            |           | 0 | 2      | MASCOT | T |
| R14009_38_3_3811  | K. EDKSYGVAQR. R       | 1152.56436 | 0.00037  | 2 | 1 | 41.84  | 0 | 3.27E-06 | 0 0 | R14009_38 | 6.17 | 1 |            |           | 0 | 2      | MASCOT | T |
| R14009_38_3_3828  | K. EDKSYGVAQR. R       | 1152.56436 | 0.00068  | 3 | 1 | 36.63  | 0 | 1.09E-05 | 0 0 | R14009_38 | 6.17 | 1 |            |           | 0 | 2      | MASCOT | T |
| R14009_38_3_3846  | K. EDKSYGVAQR. R       | 1152.56436 | -0.00023 | 2 | 1 | 44.43  | 0 | 1.80E-06 | 0 0 | R14009_38 | 6.17 | 1 |            |           | 0 | 2      | MASCOT | T |
| R14009_38_3_3891  | K. EDKSYGVAQR. R       | 1152.56436 | -0.00019 | 2 | 1 | 43.62  | 0 | 2.17E-06 | 0 0 | R14009_38 | 6.17 | 1 |            |           | 0 | 2      | MASCOT | T |
| R14009_38_3_3934  | K. EDKSYGVAQR. R       | 1152.56436 | -0.00057 | 2 | 1 | 26.29  | 0 | 1.17E-04 | 0 0 | R14009_38 | 6.17 | 1 |            |           | 0 | 2      | MASCOT | T |
| R14009_38_3_3968  | K. EDKSYGVAQR. R       | 1152.56436 | -0.00086 | 2 | 1 | 28.75  | 0 | 6.67E-05 | 0 0 | R14009_38 | 6.17 | 1 |            |           | 0 | 2      | MASCOT | T |
| R14009_38_3_9752  | K. EWVSCVR. F          | 935.44037  | 0.00022  | 2 | 1 | 25.47  | 0 | 1.42E-04 | 0 0 | R14009_38 | 6.09 | 0 |            |           | 0 | 2      | MASCOT | T |
| R14009_38_3_9796  | K. EWVSCVR. F          | 935.44037  | -0.00004 | 2 | 1 | 29.53  | 0 | 5.57E-05 | 0 0 | R14009_38 | 6.09 | 0 |            |           | 0 | 2      | MASCOT | T |
| R14009_38_3_9839  | K. EWVSCVR. F          | 935.44037  | 0.00048  | 2 | 1 | 31.64  | 0 | 3.43E-05 | 0 0 | R14009_38 | 6.09 | 0 |            |           | 0 | 2      | MASCOT | T |
| R14009_38_3_9880  | K. EWVSCVR. F          | 935.44037  | 0.00044  | 2 | 1 | 33.35  | 0 | 2.31E-05 | 0 0 | R14009_38 | 6.09 | 0 |            |           | 0 | 2      | MASCOT | T |
| R14009_38_3_9924  | K. EWVSCVR. F          | 935.44037  | 0.00016  | 2 | 1 | 33.44  | 0 | 2.26E-05 | 0 0 | R14009_38 | 6.09 | 0 |            |           | 0 | 2      | MASCOT | T |
| R14009_38_3_9969  | K. EWVSCVR. F          | 935.44037  | -0.00006 | 2 | 1 | 34.43  | 0 | 1.80E-05 | 0 0 | R14009_38 | 6.09 | 0 |            |           | 0 | 2      | MASCOT | T |
| R14009_38_3_10015 | K. EWVSCVR. F          | 935.44037  | -0.0007  | 2 | 1 | 33.25  | 0 | 2.37E-05 | 0 0 | R14009_38 | 6.09 | 0 |            |           | 0 | 2      | MASCOT | T |
| R14009_38_3_21435 | K. KLYSLEAGSIHSLCFSPNR | 2292.18048 | 0.00068  | 3 | 1 | 56.47  | 0 | 1.13E-07 | 0 0 | R14009_38 | 8.21 | 1 |            |           | 0 | 2      | MASCOT | T |
| R14009_38_3_21478 | K. KLYSLEAGSIHSLCFSPNR | 2292.18048 | 0.00086  | 3 | 1 | 83.36  | 0 | 2.31E-10 | 0 0 | R14009_38 | 8.21 | 1 |            |           | 0 | 2      | MASCOT | T |
| R14009_38_3_21499 | K. KLYSLEAGSIHSLCFSPNR | 2292.18048 | -0.00117 | 2 | 1 | 77.31  | 0 | 9.29E-10 | 0 0 | R14009_38 | 8.21 | 1 |            |           | 0 | 2      | MASCOT | T |
| R14009_38_3_21519 | K. KLYSLEAGSIHSLCFSPNR | 2292.18048 | 0.00083  | 3 | 1 | 82.16  | 0 | 3.04E-10 | 0 0 | R14009_38 | 8.21 | 1 |            |           | 0 | 2      | MASCOT | T |
| R14009_38_3_21543 | K. KLYSLEAGSIHSLCFSPNR | 2292.18048 | -0.00193 | 2 | 1 | 77.06  | 0 | 9.84E-10 | 0 0 | R14009_38 | 8.21 | 1 |            |           | 0 | 2      | MASCOT | T |
| R14009_38_3_21562 | K. KLYSLEAGSIHSLCFSPNR | 2292.18048 | 0.00275  | 3 | 1 | 74.42  | 0 | 1.81E-09 | 0 0 | R14009_38 | 8.21 | 1 |            |           | 0 | 2      | MASCOT | T |
| R14009_38_3_21607 | K. KLYSLEAGSIHSLCFSPNR | 2292.18048 | 0.0014   | 3 | 1 | 56.54  | 0 | 1.11E-07 | 0 0 | R14009_38 | 8.21 | 1 |            |           | 0 | 2      | MASCOT | T |
| R14009_38_3_21654 | K. KLYSLEAGSIHSLCFSPNR | 2292.18048 | 0.0029   | 3 | 1 | 42.74  | 0 | 2.66E-06 | 0 0 | R14009_38 | 8.21 | 1 |            |           | 0 | 2      | MASCOT | T |
| R14009_38_3_6896  | K. LTKEDK#SYGVAQR. R   | 1820.91369 | -0.00191 | 2 | 1 | 26.78  | 0 | 1.05E-04 | 0 0 | R14009_38 | 8.5  | 2 | 326.122635 | pQTGG (K) | 0 | 2      | MASCOT | T |
| R14009_38_3_5005  | K. LTKEDK#SYGVAQR. R   | 1837.94024 | 0.00036  | 2 | 1 | 28.96  | 0 | 6.35E-05 | 0 0 | R14009_38 | 8.5  | 2 | 343.149185 | QTGG (K)  | 0 | 2      | MASCOT | T |
| R14009_38_3_12610 | K. LWNLTGECK. Y        | 1120.54555 | -0.00038 | 2 | 1 | 41.68  | 0 | 6.79E-06 | 0 0 | R14009_38 | 5.99 | 0 |            |           | 0 | 2      | MASCOT | T |
| R14009_38_3_12650 | K. LWNLTGECK. Y        | 1120.54555 | -0.00024 | 2 | 1 | 50.02  | 0 | 9.95E-07 | 0 0 | R14009_38 | 5.99 | 0 |            |           | 0 | 2      | MASCOT | T |
| R14009_38_3_12681 | K. LWNLTGECK. Y        | 1120.54555 | -0.00008 | 2 | 1 | 50.16  | 0 | 9.64E-07 | 0 0 | R14009_38 | 5.99 | 0 |            |           | 0 | 2      | MASCOT | T |
| R14009_38_3_12714 | K. LWNLTGECK. Y        | 1120.54555 | -0.00068 | 2 | 1 | 50.12  | 0 | 9.73E-07 | 0 0 | R14009_38 | 5.99 | 0 |            |           | 0 | 2      | MASCOT | T |
| R14009_38_3_12747 | K. LWNLTGECK. Y        | 1120.54555 | -0.00102 | 2 | 1 | 50.24  | 0 | 9.46E-07 | 0 0 | R14009_38 | 5.99 | 0 |            |           | 0 | 2      | MASCOT | T |
| R14009_38_3_12780 | K. LWNLTGECK. Y        | 1120.54555 | -0.00106 | 2 | 1 | 50.24  | 0 | 9.46E-07 | 0 0 | R14009_38 | 5.99 | 0 |            |           | 0 | 2      | MASCOT | T |
| R14009_38_3_12813 | K. LWNLTGECK. Y        | 1120.54555 | -0.00078 | 2 | 1 | 50.16  | 0 | 9.64E-07 | 0 0 | R14009_38 | 5.99 | 0 |            |           | 0 | 2      | MASCOT | T |
| R14009_38_3_12847 | K. LWNLTGECK. Y        | 1120.54555 | -0.00024 | 2 | 1 | 50.11  | 0 | 9.75E-07 | 0 0 | R14009_38 | 5.99 | 0 |            |           | 0 | 2      | MASCOT | T |
| R14009_38_3_12882 | K. LWNLTGECK. Y        | 1120.54555 | -0.0004  | 2 | 1 | 45.59  | 0 | 2.76E-06 | 0 0 | R14009_38 | 5.99 | 0 |            |           | 0 | 2      | MASCOT | T |
| R14009_38_3_23139 | K. LYSLEAGSIHSLCFSPNR  | 2164.08552 | -0.00222 | 2 | 1 | 93.44  | 0 | 4.53E-11 | 0 0 | R14009_38 | 6.74 | 0 |            |           | 0 | 2      | MASCOT | T |
| R14009_38_3_23162 | K. LYSLEAGSIHSLCFSPNR  | 2164.08552 | 0.00524  | 3 | 1 | 65.64  | 0 | 2.73E-08 | 0 0 | R14009_38 | 6.74 | 0 |            |           | 0 | 2      | MASCOT | T |
| R14009_38_3_23179 | K. LYSLEAGSIHSLCFSPNR  | 2164.08552 | -0.0031  | 2 | 1 | 105.59 | 0 | 2.76E-12 | 0 0 | R14009_38 | 6.74 | 0 |            |           | 0 | 2      | MASCOT | T |
| R14009_38_3_23199 | K. LYSLEAGSIHSLCFSPNR  | 2164.08552 | 0.00056  | 3 | 1 | 78.34  | 0 | 1.47E-09 | 0 0 | R14009_38 | 6.74 | 0 |            |           | 0 | 2      | MASCOT | T |
| R14009_38_3_23221 | K. LYSLEAGSIHSLCFSPNR  | 2164.08552 | -0.00136 | 2 | 1 | 127.77 | 0 | 1.67E-14 | 0 0 | R14009_38 | 6.74 | 0 |            |           | 0 | 2      | MASCOT | T |
| R14009_38_3_23231 | K. LYSLEAGSIHSLCFSPNR  | 2164.08552 | -0.00022 | 3 | 1 | 82.27  | 0 | 5.93E-10 | 0 0 | R14009_38 | 6.74 | 0 |            |           | 0 | 2      | MASCOT | T |
| R14009_38_3_23253 | K. LYSLEAGSIHSLCFSPNR  | 2164.08552 | -0.00176 | 2 | 1 | 123.05 | 0 | 4.95E-14 | 0 0 | R14009_38 | 6.74 | 0 |            |           | 0 | 2      | MASCOT | T |
| R14009_38_3_23264 | K. LYSLEAGSIHSLCFSPNR  | 2164.08552 | -0.00031 | 3 | 1 | 78.1   | 0 | 1.55E-09 | 0 0 | R14009_38 | 6.74 | 0 |            |           | 0 | 2      | MASCOT | T |
| R14009_38_3_23286 | K. LYSLEAGSIHSLCFSPNR  | 2164.08552 | -0.00142 | 2 | 1 | 114.79 | 0 | 3.32E-13 | 0 0 | R14009_38 | 6.74 | 0 |            |           | 0 | 2      | MASCOT | T |
| R14009_38_3_23297 | K. LYSLEAGSIHSLCFSPNR  | 2164.08552 | -0.00007 | 3 | 1 | 74.63  | 0 | 3.44E-09 | 0 0 | R14009_38 | 6.74 | 0 |            |           | 0 | 2      | MASCOT | T |
| R14009_38_3_23319 | K. LYSLEAGSIHSLCFSPNR  | 2164.08552 | -0.00194 | 2 | 1 | 122.42 | 0 | 5.73E-14 | 0 0 | R14009_38 | 6.74 | 0 |            |           | 0 | 2      | MASCOT | T |
| R14009_38_3_23330 | K. LYSLEAGSIHSLCFSPNR  | 2164.08552 | -0.00036 | 3 | 1 | 90.31  | 0 | 9.31E-11 | 0 0 |           |      |   |            |           |   |        |        |   |

|                   |                          |            |          |   |   |        |   |          |   |                       |      |   |            |           |        |        |        |   |
|-------------------|--------------------------|------------|----------|---|---|--------|---|----------|---|-----------------------|------|---|------------|-----------|--------|--------|--------|---|
| R14009_38_3_23398 | K. LYSLEAGSIHSLCFSPNR.   | 2164.08552 | -0.00106 | 3 | 1 | 61.34  | 0 | 7.35E-08 | 0 | R14009_38             | 6.74 | 0 | 0          | 2         | MASCOT | T      |        |   |
| R14009_38_3_23417 | K. LYSLEAGSIHSLCFSPNR.   | 2164.08552 | -0.0021  | 2 | 1 | 111.04 | 0 | 7.87E-13 | 0 | R14009_38             | 6.74 | 0 | 0          | 0         | 2      | MASCOT | T      |   |
| R14009_38_3_23431 | K. LYSLEAGSIHSLCFSPNR.   | 2164.08552 | -0.00016 | 3 | 1 | 66.68  | 0 | 2.15E-08 | 0 | R14009_38             | 6.74 | 0 | 0          | 0         | 2      | MASCOT | T      |   |
| R14009_38_3_23453 | K. LYSLEAGSIHSLCFSPNR.   | 2164.08552 | -0.00336 | 2 | 1 | 95.07  | 0 | 3.11E-11 | 0 | R14009_38             | 6.74 | 0 | 0          | 0         | 2      | MASCOT | T      |   |
| R14009_38_3_23465 | K. LYSLEAGSIHSLCFSPNR.   | 2164.08552 | -0.00081 | 3 | 1 | 49.06  | 0 | 1.24E-06 | 0 | R14009_38             | 6.74 | 0 | 0          | 0         | 2      | MASCOT | T      |   |
| R14009_38_3_23488 | K. LYSLEAGSIHSLCFSPNR.   | 2164.08552 | -0.00372 | 2 | 1 | 58.15  | 0 | 1.53E-07 | 0 | R14009_38             | 6.74 | 0 | 0          | 0         | 2      | MASCOT | T      |   |
| R14009_38_3_23533 | K. LYSLEAGSIHSLCFSPNR.   | 2164.08552 | -0.0043  | 2 | 1 | 34.3   | 0 | 3.72E-05 | 0 | R14009_38             | 6.74 | 0 | 0          | 0         | 2      | MASCOT | T      |   |
| R14009_38_3_16501 | K. SIILWK. L             | 759.47632  | -0.00075 | 2 | 1 | 33.59  | 0 | 2.19E-05 | 0 | R14009_38             | 8.47 | 0 | 0          | 0         | 2      | MASCOT | T      |   |
| R14009_38_3_16531 | K. SIILWK. L             | 759.47632  | -0.00123 | 2 | 1 | 33.68  | 0 | 2.14E-05 | 0 | R14009_38             | 8.47 | 0 | 0          | 0         | 2      | MASCOT | T      |   |
| R14009_38_3_16564 | K. SIILWK. L             | 759.47632  | -0.00043 | 2 | 1 | 33.91  | 0 | 2.03E-05 | 0 | R14009_38             | 8.47 | 0 | 0          | 0         | 2      | MASCOT | T      |   |
| R14009_38_3_16597 | K. SIILWK. L             | 759.47632  | -0.00033 | 2 | 1 | 33.94  | 0 | 2.02E-05 | 0 | R14009_38             | 8.47 | 0 | 0          | 0         | 2      | MASCOT | T      |   |
| R14009_38_3_16630 | K. SIILWK. L             | 759.47632  | -0.00101 | 2 | 1 | 33.88  | 0 | 2.05E-05 | 0 | R14009_38             | 8.47 | 0 | 0          | 0         | 2      | MASCOT | T      |   |
| R14009_38_3_16663 | K. SIILWK. L             | 759.47632  | -0.00173 | 2 | 1 | 33.76  | 0 | 2.10E-05 | 0 | R14009_38             | 8.47 | 0 | 0          | 0         | 2      | MASCOT | T      |   |
| R14009_38_3_16696 | K. SIILWK. L             | 759.47632  | -0.00103 | 2 | 1 | 33.68  | 0 | 2.14E-05 | 0 | R14009_38             | 8.47 | 0 | 0          | 0         | 2      | MASCOT | T      |   |
| R14009_38_3_16729 | K. SIILWK. L             | 759.47632  | -0.00109 | 2 | 1 | 33.34  | 0 | 2.32E-05 | 0 | R14009_38             | 8.47 | 0 | 0          | 0         | 2      | MASCOT | T      |   |
| R14009_38_3_16762 | K. SIILWK. L             | 759.47632  | -0.00049 | 2 | 1 | 32.84  | 0 | 2.60E-05 | 0 | R14009_38             | 8.47 | 0 | 0          | 0         | 2      | MASCOT | T      |   |
| R14009_38_3_7673  | K. SVVEDLK. V            | 789.43526  | -0.00067 | 2 | 1 | 34.18  | 0 | 1.91E-05 | 0 | R14009_38             | 4.37 | 0 | 0          | 0         | 2      | MASCOT | T      |   |
| R14009_38_3_7717  | K. SVVEDLK. V            | 789.43526  | -0.00011 | 2 | 1 | 36.75  | 0 | 1.06E-05 | 0 | R14009_38             | 4.37 | 0 | 0          | 0         | 2      | MASCOT | T      |   |
| R14009_38_3_7747  | K. SVVEDLK. V            | 789.43526  | -0.00019 | 2 | 1 | 36.86  | 0 | 1.03E-05 | 0 | R14009_38             | 4.37 | 0 | 0          | 0         | 2      | MASCOT | T      |   |
| R14009_38_3_7780  | K. SVVEDLK. V            | 789.43526  | -0.00035 | 2 | 1 | 35.5   | 0 | 1.41E-05 | 0 | R14009_38             | 4.37 | 0 | 0          | 0         | 2      | MASCOT | T      |   |
| R14009_38_3_7813  | K. SVVEDLK. V            | 789.43526  | -0.00079 | 2 | 1 | 35.58  | 0 | 1.38E-05 | 0 | R14009_38             | 4.37 | 0 | 0          | 0         | 2      | MASCOT | T      |   |
| R14009_38_3_7846  | K. SVVEDLK. V            | 789.43526  | -0.00069 | 2 | 1 | 36.91  | 0 | 1.02E-05 | 0 | R14009_38             | 4.37 | 0 | 0          | 0         | 2      | MASCOT | T      |   |
| R14009_38_3_7879  | K. SVVEDLK. V            | 789.43526  | -0.00085 | 2 | 1 | 35.51  | 0 | 1.41E-05 | 0 | R14009_38             | 4.37 | 0 | 0          | 0         | 2      | MASCOT | T      |   |
| R14009_38_3_7912  | K. SVVEDLK. V            | 789.43526  | -0.00051 | 2 | 1 | 36.87  | 0 | 1.03E-05 | 0 | R14009_38             | 4.37 | 0 | 0          | 0         | 2      | MASCOT | T      |   |
| R14009_38_3_7945  | K. SVVEDLK. V            | 789.43526  | -0.00003 | 2 | 1 | 35.5   | 0 | 1.41E-05 | 0 | R14009_38             | 4.37 | 0 | 0          | 0         | 2      | MASCOT | T      |   |
| R14009_38_3_7979  | K. SVVEDLK. V            | 789.43526  | 0.00017  | 2 | 1 | 36.91  | 0 | 1.02E-05 | 0 | R14009_38             | 4.37 | 0 | 0          | 0         | 2      | MASCOT | T      |   |
| R14009_38_3_8012  | K. SVVEDLK. V            | 789.43526  | 0.00047  | 2 | 1 | 35.86  | 0 | 1.30E-05 | 0 | R14009_38             | 4.37 | 0 | 0          | 0         | 2      | MASCOT | T      |   |
| R14009_38_3_18497 | K. SVVEDLK@VDLKAEEA.K    | 2116.11317 | -0.00597 | 2 | 1 | 22.68  | 0 | 5.40E-04 | 0 | R14009_38             | 4.51 | 2 | 343.149185 | QTGG (K)  | 0      | 2      | MASCOT | T |
| R14009_38_3_18541 | K. SVVEDLK@VDLKAEEA.K    | 2116.11317 | -0.00509 | 2 | 1 | 34.74  | 0 | 3.36E-05 | 0 | R14009_38             | 4.51 | 2 | 343.149185 | QTGG (K)  | 0      | 2      | MASCOT | T |
| R14009_38_3_15392 | K. SVVEDLKVDLK. A        | 1244.70964 | -0.00085 | 2 | 1 | 61.7   | 0 | 3.38E-08 | 0 | R14009_38             | 4.56 | 1 | 0          | 0         | 2      | MASCOT | T      |   |
| R14009_38_3_15426 | K. SVVEDLKVDLK. A        | 1244.70964 | 0.00054  | 3 | 1 | 33.34  | 0 | 2.32E-05 | 0 | R14009_38             | 4.56 | 1 | 0          | 0         | 2      | MASCOT | T      |   |
| R14009_38_3_15468 | K. SVVEDLKVDLK. A        | 1244.70964 | 0.00021  | 3 | 1 | 46.71  | 0 | 1.07E-06 | 0 | R14009_38             | 4.56 | 1 | 0          | 0         | 2      | MASCOT | T      |   |
| R14009_38_3_15477 | K. SVVEDLKVDLK. A        | 1244.70964 | -0.00345 | 2 | 1 | 62.79  | 0 | 2.63E-08 | 0 | R14009_38             | 4.56 | 1 | 0          | 0         | 2      | MASCOT | T      |   |
| R14009_38_3_15508 | K. SVVEDLKVDLK. A        | 1244.70964 | -0.00012 | 3 | 1 | 46.87  | 0 | 1.03E-06 | 0 | R14009_38             | 4.56 | 1 | 0          | 0         | 2      | MASCOT | T      |   |
| R14009_38_3_15541 | K. SVVEDLKVDLK. A        | 1244.70964 | 0.00003  | 3 | 1 | 49.12  | 0 | 6.12E-07 | 0 | R14009_38             | 4.56 | 1 | 0          | 0         | 2      | MASCOT | T      |   |
| R14009_38_3_15574 | K. SVVEDLKVDLK. A        | 1244.70964 | -0.00006 | 3 | 1 | 45.49  | 0 | 1.41E-06 | 0 | R14009_38             | 4.56 | 1 | 0          | 0         | 2      | MASCOT | T      |   |
| R14009_38_3_15609 | K. SVVEDLKVDLK. A        | 1244.70964 | -0.00033 | 3 | 1 | 49.24  | 0 | 5.96E-07 | 0 | R14009_38             | 4.56 | 1 | 0          | 0         | 2      | MASCOT | T      |   |
| R14009_38_3_15642 | K. SVVEDLKVDLK. A        | 1244.70964 | 0.00039  | 3 | 1 | 47.76  | 0 | 8.37E-07 | 0 | R14009_38             | 4.56 | 1 | 0          | 0         | 2      | MASCOT | T      |   |
| R14009_38_3_15676 | K. SVVEDLKVDLK. A        | 1244.70964 | 0.00012  | 3 | 1 | 47.81  | 0 | 8.28E-07 | 0 | R14009_38             | 4.56 | 1 | 0          | 0         | 2      | MASCOT | T      |   |
| R14009_38_3_15712 | K. SVVEDLKVDLK. A        | 1244.70964 | 0.00018  | 3 | 1 | 44.02  | 0 | 1.98E-06 | 0 | R14009_38             | 4.56 | 1 | 0          | 0         | 2      | MASCOT | T      |   |
| R14009_38_3_15759 | K. SVVEDLKVDLK. A        | 1244.70964 | 0.00057  | 3 | 1 | 45.88  | 0 | 1.29E-06 | 0 | R14009_38             | 4.56 | 1 | 0          | 0         | 2      | MASCOT | T      |   |
| R14009_38_3_18121 | K. SVVEDLKVDLK@AEAEK. T  | 2116.11317 | -0.00793 | 2 | 1 | 36.5   | 0 | 2.24E-05 | 0 | R14009_38             | 4.51 | 2 | 343.149185 | QTGG (K)  | 0      | 2      | MASCOT | T |
| R14009_38_3_18133 | K. SVVEDLKVDLK@AEAEK. T  | 2116.11317 | -0.00266 | 3 | 1 | 22.08  | 0 | 6.19E-04 | 0 | R14009_38             | 4.51 | 2 | 343.149185 | QTGG (K)  | 0      | 2      | MASCOT | T |
| R14009_38_3_18179 | K. SVVEDLKVDLK@AEAEK. T  | 2116.11317 | -0.00669 | 2 | 1 | 47.58  | 0 | 1.75E-06 | 0 | R14009_38             | 4.51 | 2 | 343.149185 | QTGG (K)  | 0      | 2      | MASCOT | T |
| R14009_38_3_18267 | K. SVVEDLKVDLK@AEAEK. T  | 2116.11317 | -0.00493 | 2 | 1 | 30.68  | 0 | 8.55E-05 | 0 | R14009_38             | 4.51 | 2 | 343.149185 | QTGG (K)  | 0      | 2      | MASCOT | T |
| R14009_38_3_18311 | K. SVVEDLKVDLK@AEAEK. T  | 2116.11317 | -0.00551 | 2 | 1 | 45.33  | 0 | 2.93E-06 | 0 | R14009_38             | 4.51 | 2 | 343.149185 | QTGG (K)  | 0      | 2      | MASCOT | T |
| R14009_38_3_18364 | K. SVVEDLKVDLK@AEAEK. T  | 2116.11317 | -0.00623 | 2 | 1 | 45.45  | 0 | 2.85E-06 | 0 | R14009_38             | 4.51 | 2 | 343.149185 | QTGG (K)  | 0      | 2      | MASCOT | T |
| R14009_38_3_18409 | K. SVVEDLKVDLK@AEAEK. T  | 2116.11317 | -0.00579 | 2 | 1 | 34.38  | 0 | 3.65E-05 | 0 | R14009_38             | 4.51 | 2 | 343.149185 | QTGG (K)  | 0      | 2      | MASCOT | T |
| R14009_38_3_3967  | K. SYGVAQR. R            | 780.39987  | -0.00019 | 2 | 1 | 28.91  | 0 | 6.43E-05 | 0 | R14009_38             | 8.46 | 0 | 0          | 0         | 2      | MASCOT | T      |   |
| R14009_38_3_3997  | K. SYGVAQR. R            | 780.39987  | -0.00032 | 2 | 1 | 29.44  | 0 | 5.69E-05 | 0 | R14009_38             | 8.46 | 0 | 0          | 0         | 2      | MASCOT | T      |   |
| R14009_38_3_4030  | K. SYGVAQR. R            | 780.39987  | -0.00033 | 2 | 1 | 28.47  | 0 | 7.11E-05 | 0 | R14009_38             | 8.46 | 0 | 0          | 0         | 2      | MASCOT | T      |   |
| R14009_38_3_4063  | K. SYGVAQR. R            | 780.39987  | -0.00027 | 2 | 1 | 29.12  | 0 | 6.12E-05 | 0 | R14009_38             | 8.46 | 0 | 0          | 0         | 2      | MASCOT | T      |   |
| R14009_38_3_4096  | K. SYGVAQR. R            | 780.39987  | -0.00045 | 2 | 1 | 31.67  | 0 | 3.40E-05 | 0 | R14009_38             | 8.46 | 0 | 0          | 0         | 2      | MASCOT | T      |   |
| R14009_38_3_4129  | K. SYGVAQR. R            | 780.39987  | -0.00047 | 2 | 1 | 28.56  | 0 | 6.97E-05 | 0 | R14009_38             | 8.46 | 0 | 0          | 0         | 2      | MASCOT | T      |   |
| R14009_38_3_4162  | K. SYGVAQR. R            | 780.39987  | -0.00015 | 2 | 1 | 28.62  | 0 | 6.87E-05 | 0 | R14009_38             | 8.46 | 0 | 0          | 0         | 2      | MASCOT | T      |   |
| R14009_38_3_4195  | K. SYGVAQR. R            | 780.39987  | -0.00032 | 2 | 1 | 28.49  | 0 | 7.08E-05 | 0 | R14009_38             | 8.46 | 0 | 0          | 0         | 2      | MASCOT | T      |   |
| R14009_38_3_4228  | K. SYGVAQR. R            | 780.39987  | 0.00009  | 2 | 1 | 28.13  | 0 | 7.69E-05 | 0 | R14009_38             | 8.46 | 0 | 0          | 0         | 2      | MASCOT | T      |   |
| R14009_38_3_4263  | K. SYGVAQR. R            | 780.39987  | 0.00003  | 2 | 1 | 27.44  | 0 | 9.02E-05 | 0 | R14009_38             | 8.46 | 0 | 0          | 0         | 2      | MASCOT | T      |   |
| R14009_38_3_4966  | K. TDGSGTIGNK#TK. V      | 1504.7238  | 0.00037  | 2 | 1 | 73.26  | 0 | 2.36E-09 | 0 | R14009_38             | 8.26 | 1 | 326.122635 | pQTGG (K) | 0      | 2      | MASCOT | T |
| R14009_38_3_4998  | K. TDGSGTIGNK#TK. V      | 1504.7238  | 0.00025  | 2 | 1 | 61.69  | 0 | 3.39E-08 | 0 | R14009_38             | 8.26 | 1 | 326.122635 | pQTGG (K) | 0      | 2      | MASCOT | T |
| R14009_38_3_5064  | K. TDGSGTIGNK#TK. V      | 1504.7238  | -0.00055 | 2 | 1 | 61.74  | 0 | 3.35E-08 | 0 | R14009_38             | 8.26 | 1 | 326.122635 | pQTGG (K) | 0      | 2      | MASCOT | T |
| R14009_38_3_5099  | K. TDGSGTIGNK#TK. V      | 1504.7238  | -0.00087 | 2 | 1 | 45.18  | 0 | 1.52E-06 | 0 | R14009_38             | 8.26 | 1 | 326.122635 | pQTGG (K) | 0      | 2      | MASCOT | T |
| R14009_38_3_3075  | K. TDGSGTIGNK#TK. V      | 1521.75035 | 0.00113  | 2 | 1 | 25.93  | 0 | 1.28E-04 | 0 | R14009_38             | 8.26 | 1 | 343.149185 | QTGG (K)  | 0      | 2      | MASCOT | T |
| R14009_38_3_4881  | K. TDGSGTIGNKTK#. V ! K. | 1504.7238  | 0.00067  | 2 | 1 | 53.95  | 0 | 2.01E-07 | 0 | R14009_38 ! R14009_38 | 8.26 | 1 | 326.122635 | pQTGG (K) | 0      | 2      | MASCOT | T |
| R14009_38_3_4923  | K. TDGSGTIGNKTK#. V ! K. | 1504.7238  | 0.00065  | 2 | 1 | 65.37  | 0 | 1.45E-08 | 0 | R14009_38 ! R14009_38 | 8.26 | 1 | 326.122635 | pQTGG (K) | 0      | 2      | MASCOT | T |
| R14009_38_3_5030  | K. TDGSGTIGNKTK#. V ! K. | 1504.7238  | 0.00073  | 2 | 1 | 64.75  | 0 | 1.67E-08 | 0 | R14009_38 ! R14009_38 | 8.26 | 1 | 326.122635 | pQTGG (K) | 0      | 2      | MASCOT | T |
| R14009_38_3_5133  | K. TDGSGTIGNKTK#. V ! K. | 1504.7238  | -0.00039 | 2 | 1 | 41.79  | 0 | 3.31E-06 | 0 | R14009_38 ! R14009_38 | 8.26 | 1 | 326.122635 | pQTGG (K) | 0      | 2      | MASCOT | T |
| R14009_38_3_8820  | K. VDLK#AEAEK. T         | 1328.6692  | 0.0016   | 2 | 1 | 61.36  | 0 | 3.66E-08 | 0 | R14009_38             | 4.68 | 0 | 0          | 0         | 2      | MASCOT | T      |   |
| R14009_38_3_8861  | K. VDLK#AEAEK. T         | 1328.6692  | 0.00084  | 2 | 1 | 62.87  | 0 | 2.58E-08 | 0 | R14009_38             | 4.68 | 0 | 0          | 0         | 2      | MASCOT | T      |   |
| R14009_38_3_8891  | K. VDLK#AEAEK. T         | 1328.6692  | 0.00146  | 2 | 1 | 62.75  | 0 | 2.65E-08 | 0 | R14009_38             | 4.68 | 0 | 0          | 0         | 2      | MASCOT | T      |   |
| R14009_38_3_8924  | K. VDLK#AEAEK. T         | 1328.6692  | 0.0      |   |   |        |   |          |   |                       |      |   |            |           |        |        |        |   |

|                   |                       |            |          |   |   |       |   |          |     |           |      |   |            |           |   |   |        |   |
|-------------------|-----------------------|------------|----------|---|---|-------|---|----------|-----|-----------|------|---|------------|-----------|---|---|--------|---|
| R14009_38_3_9023  | K.VDLK#AEAEK.T        | 1328.6692  | 0.00072  | 2 | 1 | 58.47 | 0 | 7.11E-08 | 0 0 | R14009_38 | 4.68 | 1 | 326.122635 | pQTGG (K) | 0 | 2 | MASCOT | T |
| R14009_38_3_9056  | K.VDLK#AEAEK.T        | 1328.6692  | 0.00008  | 2 | 1 | 54.52 | 0 | 1.77E-07 | 0 0 | R14009_38 | 4.68 | 1 | 326.122635 | pQTGG (K) | 0 | 2 | MASCOT | T |
| R14009_38_3_9089  | K.VDLK#AEAEK.T        | 1328.6692  | -0.00004 | 2 | 1 | 54.8  | 0 | 1.66E-07 | 0 0 | R14009_38 | 4.68 | 1 | 326.122635 | pQTGG (K) | 0 | 2 | MASCOT | T |
| R14009_38_3_9122  | K.VDLK#AEAEK.T        | 1328.6692  | 0.00022  | 2 | 1 | 59.03 | 0 | 6.25E-08 | 0 0 | R14009_38 | 4.68 | 1 | 326.122635 | pQTGG (K) | 0 | 2 | MASCOT | T |
| R14009_38_3_9161  | K.VDLK#AEAEK.T        | 1328.6692  | 0.0002   | 2 | 1 | 50.77 | 0 | 4.19E-07 | 0 0 | R14009_38 | 4.68 | 1 | 326.122635 | pQTGG (K) | 0 | 2 | MASCOT | T |
| R14009_38_3_12105 | K.VDLK#AEAEKTDGSGTGNK | 2259.10989 | -0.00133 | 3 | 1 | 65.88 | 0 | 1.29E-08 | 0 0 | R14009_38 | 4.78 | 2 | 326.122635 | pQTGG (K) | 0 | 2 | MASCOT | T |
| R14009_38_3_12116 | K.VDLK#AEAEKTDGSGTGNK | 2259.10989 | -0.00013 | 2 | 1 | 71.13 | 0 | 3.85E-09 | 0 0 | R14009_38 | 4.78 | 2 | 326.122635 | pQTGG (K) | 0 | 2 | MASCOT | T |
| R14009_38_3_12147 | K.VDLK#AEAEKTDGSGTGNK | 2259.10989 | -0.00007 | 3 | 1 | 73.31 | 0 | 2.33E-09 | 0 0 | R14009_38 | 4.78 | 2 | 326.122635 | pQTGG (K) | 0 | 2 | MASCOT | T |
| R14009_38_3_12158 | K.VDLK#AEAEKTDGSGTGNK | 2259.10989 | -0.00167 | 2 | 1 | 82.31 | 0 | 2.94E-10 | 0 0 | R14009_38 | 4.78 | 2 | 326.122635 | pQTGG (K) | 0 | 2 | MASCOT | T |
| R14009_38_3_12191 | K.VDLK#AEAEKTDGSGTGNK | 2259.10989 | -0.00178 | 3 | 1 | 73.78 | 0 | 2.09E-09 | 0 0 | R14009_38 | 4.78 | 2 | 326.122635 | pQTGG (K) | 0 | 2 | MASCOT | T |
| R14009_38_3_6533  | K.VDLK#AEAEK.T        | 1345.69575 | -0.00031 | 2 | 1 | 26.91 | 0 | 1.02E-04 | 0 0 | R14009_38 | 4.68 | 1 | 343.149185 | QTGG (K)  | 0 | 2 | MASCOT | T |
| R14009_38_3_6570  | K.VDLK#AEAEK.T        | 1345.69575 | 0.00021  | 2 | 1 | 23.21 | 0 | 2.39E-04 | 0 0 | R14009_38 | 4.68 | 1 | 343.149185 | QTGG (K)  | 0 | 2 | MASCOT | T |
| R14009_38_3_6603  | K.VDLK#AEAEK.T        | 1345.69575 | 0.00025  | 2 | 1 | 20.84 | 0 | 4.12E-04 | 0 0 | R14009_38 | 4.68 | 1 | 343.149185 | QTGG (K)  | 0 | 2 | MASCOT | T |
| R14009_38_3_6625  | K.VDLK#AEAEK.T        | 1345.69575 | 0.00011  | 3 | 1 | 20.11 | 0 | 4.87E-04 | 0 0 | R14009_38 | 4.68 | 1 | 343.149185 | QTGG (K)  | 0 | 2 | MASCOT | T |
| R14009_38_3_6636  | K.VDLK#AEAEK.T        | 1345.69575 | 0.00021  | 2 | 1 | 23.36 | 0 | 2.31E-04 | 0 0 | R14009_38 | 4.68 | 1 | 343.149185 | QTGG (K)  | 0 | 2 | MASCOT | T |
| R14009_38_3_6669  | K.VDLK#AEAEK.T        | 1345.69575 | -0.00007 | 2 | 1 | 20.9  | 0 | 4.06E-04 | 0 0 | R14009_38 | 4.68 | 1 | 343.149185 | QTGG (K)  | 0 | 2 | MASCOT | T |
| R14009_38_3_6702  | K.VDLK#AEAEK.T        | 1345.69575 | -0.00029 | 2 | 1 | 23.33 | 0 | 2.32E-04 | 0 0 | R14009_38 | 4.68 | 1 | 343.149185 | QTGG (K)  | 0 | 2 | MASCOT | T |
| R14009_38_3_6735  | K.VDLK#AEAEK.T        | 1345.69575 | 0.00111  | 2 | 1 | 23.27 | 0 | 2.35E-04 | 0 0 | R14009_38 | 4.68 | 1 | 343.149185 | QTGG (K)  | 0 | 2 | MASCOT | T |
| R14009_38_3_6769  | K.VDLK#AEAEK.T        | 1345.69575 | 0.00051  | 2 | 1 | 23.31 | 0 | 2.33E-04 | 0 0 | R14009_38 | 4.68 | 1 | 343.149185 | QTGG (K)  | 0 | 2 | MASCOT | T |
| R14009_38_3_6802  | K.VDLK#AEAEK.T        | 1345.69575 | 0.00077  | 2 | 1 | 23.23 | 0 | 2.38E-04 | 0 0 | R14009_38 | 4.68 | 1 | 343.149185 | QTGG (K)  | 0 | 2 | MASCOT | T |
| R14009_38_3_6838  | K.VDLK#AEAEK.T        | 1345.69575 | 0.00061  | 2 | 1 | 21.44 | 0 | 3.59E-04 | 0 0 | R14009_38 | 4.68 | 1 | 343.149185 | QTGG (K)  | 0 | 2 | MASCOT | T |
| R14009_38_3_10324 | K.VDLK#AEAEKTDGSGTGNK | 2276.13644 | -0.00214 | 2 | 1 | 33.13 | 0 | 2.43E-05 | 0 0 | R14009_38 | 4.78 | 2 | 343.149185 | QTGG (K)  | 0 | 2 | MASCOT | T |
| R14009_38_3_10330 | K.VDLK#AEAEKTDGSGTGNK | 2276.13644 | 0.00103  | 3 | 1 | 82.45 | 0 | 2.84E-10 | 0 0 | R14009_38 | 4.78 | 2 | 343.149185 | QTGG (K)  | 0 | 2 | MASCOT | T |
| R14009_38_3_10336 | K.VDLK#AEAEKTDGSGTGNK | 2276.13644 | -0.00081 | 4 | 1 | 37.68 | 0 | 8.53E-06 | 0 0 | R14009_38 | 4.78 | 2 | 343.149185 | QTGG (K)  | 0 | 2 | MASCOT | T |
| R14009_38_3_10368 | K.VDLK#AEAEKTDGSGTGNK | 2276.13644 | -0.00146 | 2 | 1 | 72.49 | 0 | 2.82E-09 | 0 0 | R14009_38 | 4.78 | 2 | 343.149185 | QTGG (K)  | 0 | 2 | MASCOT | T |
| R14009_38_3_10375 | K.VDLK#AEAEKTDGSGTGNK | 2276.13644 | 0.00271  | 3 | 1 | 82.77 | 0 | 2.64E-10 | 0 0 | R14009_38 | 4.78 | 2 | 343.149185 | QTGG (K)  | 0 | 2 | MASCOT | T |
| R14009_38_3_10377 | K.VDLK#AEAEKTDGSGTGNK | 2276.13644 | 0.00143  | 4 | 1 | 59.57 | 0 | 5.52E-08 | 0 0 | R14009_38 | 4.78 | 2 | 343.149185 | QTGG (K)  | 0 | 2 | MASCOT | T |
| R14009_38_3_10409 | K.VDLK#AEAEKTDGSGTGNK | 2276.13644 | -0.00132 | 2 | 1 | 89.63 | 0 | 5.44E-11 | 0 0 | R14009_38 | 4.78 | 2 | 343.149185 | QTGG (K)  | 0 | 2 | MASCOT | T |
| R14009_38_3_10417 | K.VDLK#AEAEKTDGSGTGNK | 2276.13644 | 0.00139  | 3 | 1 | 91.43 | 0 | 3.60E-11 | 0 0 | R14009_38 | 4.78 | 2 | 343.149185 | QTGG (K)  | 0 | 2 | MASCOT | T |
| R14009_38_3_10419 | K.VDLK#AEAEKTDGSGTGNK | 2276.13644 | -0.00013 | 4 | 1 | 50.59 | 0 | 4.36E-07 | 0 0 | R14009_38 | 4.78 | 2 | 343.149185 | QTGG (K)  | 0 | 2 | MASCOT | T |
| R14009_38_3_10451 | K.VDLK#AEAEKTDGSGTGNK | 2276.13644 | 0.00178  | 3 | 1 | 86.09 | 0 | 1.23E-10 | 0 0 | R14009_38 | 4.78 | 2 | 343.149185 | QTGG (K)  | 0 | 2 | MASCOT | T |
| R14009_38_3_10452 | K.VDLK#AEAEKTDGSGTGNK | 2276.13644 | -0.00068 | 2 | 1 | 81.84 | 0 | 3.27E-10 | 0 0 | R14009_38 | 4.78 | 2 | 343.149185 | QTGG (K)  | 0 | 2 | MASCOT | T |
| R14009_38_3_10465 | K.VDLK#AEAEKTDGSGTGNK | 2276.13644 | -0.00065 | 4 | 1 | 49.72 | 0 | 5.33E-07 | 0 0 | R14009_38 | 4.78 | 2 | 343.149185 | QTGG (K)  | 0 | 2 | MASCOT | T |
| R14009_38_3_10496 | K.VDLK#AEAEKTDGSGTGNK | 2276.13644 | -0.00146 | 3 | 1 | 63.11 | 0 | 2.44E-08 | 0 0 | R14009_38 | 4.78 | 2 | 343.149185 | QTGG (K)  | 0 | 2 | MASCOT | T |
| R14009_38_3_5400  | K.VDLK#AEAEK.T        | 1002.54657 | -0.00026 | 2 | 1 | 56.51 | 0 | 1.12E-07 | 0 0 | R14009_38 | 4.68 | 1 |            |           | 0 | 2 | MASCOT | T |
| R14009_38_3_5439  | K.VDLK#AEAEK.T        | 1002.54657 | -0.00062 | 2 | 1 | 53.65 | 0 | 2.16E-07 | 0 0 | R14009_38 | 4.68 | 1 |            |           | 0 | 2 | MASCOT | T |
| R14009_38_3_5472  | K.VDLK#AEAEK.T        | 1002.54657 | -0.00048 | 2 | 1 | 54.81 | 0 | 1.65E-07 | 0 0 | R14009_38 | 4.68 | 1 |            |           | 0 | 2 | MASCOT | T |
| R14009_38_3_10795 | K.VWNLQCK.L           | 1061.51967 | -0.00108 | 2 | 1 | 24.46 | 0 | 1.79E-04 | 0 0 | R14009_38 | 8.19 | 0 |            |           | 0 | 2 | MASCOT | T |
| R14009_38_3_10835 | K.VWNLQCK.L           | 1061.51967 | -0.00088 | 2 | 1 | 32.05 | 0 | 3.12E-05 | 0 0 | R14009_38 | 8.19 | 0 |            |           | 0 | 2 | MASCOT | T |
| R14009_38_3_10867 | K.VWNLQCK.L           | 1061.51967 | -0.00042 | 2 | 1 | 42.57 | 0 | 2.77E-06 | 0 0 | R14009_38 | 8.19 | 0 |            |           | 0 | 2 | MASCOT | T |
| R14009_38_3_10900 | K.VWNLQCK.L           | 1061.51967 | -0.00002 | 2 | 1 | 45.69 | 0 | 1.35E-06 | 0 0 | R14009_38 | 8.19 | 0 |            |           | 0 | 2 | MASCOT | T |
| R14009_38_3_10933 | K.VWNLQCK.L           | 1061.51967 | 0.00006  | 2 | 1 | 42.77 | 0 | 2.64E-06 | 0 0 | R14009_38 | 8.19 | 0 |            |           | 0 | 2 | MASCOT | T |
| R14009_38_3_10966 | K.VWNLQCK.L           | 1061.51967 | 0.00048  | 2 | 1 | 46.04 | 0 | 1.24E-06 | 0 0 | R14009_38 | 8.19 | 0 |            |           | 0 | 2 | MASCOT | T |
| R14009_38_3_11000 | K.VWNLQCK.L           | 1061.51967 | 0.0003   | 2 | 1 | 45.99 | 0 | 1.26E-06 | 0 0 | R14009_38 | 8.19 | 0 |            |           | 0 | 2 | MASCOT | T |
| R14009_38_3_11033 | K.VWNLQCK.L           | 1061.51967 | 0.0003   | 2 | 1 | 46.08 | 0 | 1.23E-06 | 0 0 | R14009_38 | 8.19 | 0 |            |           | 0 | 2 | MASCOT | T |
| R14009_38_3_11065 | K.VWNLQCK.L           | 1061.51967 | 0.00036  | 2 | 1 | 45.97 | 0 | 1.26E-06 | 0 0 | R14009_38 | 8.19 | 0 |            |           | 0 | 2 | MASCOT | T |
| R14009_38_3_11099 | K.VWNLQCK.L           | 1061.51967 | -0.00042 | 2 | 1 | 49.13 | 0 | 6.11E-07 | 0 0 | R14009_38 | 8.19 | 0 |            |           | 0 | 2 | MASCOT | T |
| R14009_38_3_5168  | K.YTISEADGHK.E        | 1120.52691 | -0.00019 | 2 | 1 | 61.19 | 0 | 7.60E-08 | 0 0 | R14009_38 | 5.32 | 0 |            |           | 0 | 2 | MASCOT | T |
| R14009_38_3_5208  | K.YTISEADGHK.E        | 1120.52691 | -0.00025 | 2 | 1 | 61.04 | 0 | 7.87E-08 | 0 0 | R14009_38 | 5.32 | 0 |            |           | 0 | 2 | MASCOT | T |
| R14009_38_3_5241  | K.YTISEADGHK.E        | 1120.52691 | -0.00071 | 2 | 1 | 40.23 | 0 | 9.48E-06 | 0 0 | R14009_38 | 5.32 | 0 |            |           | 0 | 2 | MASCOT | T |
| R14009_38_3_5273  | K.YTISEADGHK.E        | 1120.52691 | -0.00031 | 2 | 1 | 29.16 | 0 | 1.21E-04 | 0 0 | R14009_38 | 5.32 | 0 |            |           | 0 | 2 | MASCOT | T |
| R14009_38_3_5714  | K.YTISEADGHK.E        | 1120.52691 | 0.00011  | 2 | 1 | 35.02 | 0 | 3.15E-05 | 0 0 | R14009_38 | 5.32 | 0 |            |           | 0 | 2 | MASCOT | T |
| R14009_38_3_5745  | K.YTISEADGHK.E        | 1120.52691 | -0.00031 | 2 | 1 | 61.34 | 0 | 7.35E-08 | 0 0 | R14009_38 | 5.32 | 0 |            |           | 0 | 2 | MASCOT | T |
| R14009_38_3_5769  | K.YTISEADGHK.E        | 1120.52691 | -0.00036 | 3 | 1 | 46.61 | 0 | 2.18E-06 | 0 0 | R14009_38 | 5.32 | 0 |            |           | 0 | 2 | MASCOT | T |
| R14009_38_3_5778  | K.YTISEADGHK.E        | 1120.52691 | -0.00083 | 2 | 1 | 61.68 | 0 | 6.79E-08 | 0 0 | R14009_38 | 5.32 | 0 |            |           | 0 | 2 | MASCOT | T |
| R14009_38_3_5800  | K.YTISEADGHK.E        | 1120.52691 | -0.00048 | 3 | 1 | 46.83 | 0 | 2.07E-06 | 0 0 | R14009_38 | 5.32 | 0 |            |           | 0 | 2 | MASCOT | T |
| R14009_38_3_5811  | K.YTISEADGHK.E        | 1120.52691 | -0.00195 | 2 | 1 | 61.77 | 0 | 6.65E-08 | 0 0 | R14009_38 | 5.32 | 0 |            |           | 0 | 2 | MASCOT | T |
| R14009_38_3_5833  | K.YTISEADGHK.E        | 1120.52691 | -0.00066 | 3 | 1 | 43.21 | 0 | 4.78E-06 | 0 0 | R14009_38 | 5.32 | 0 |            |           | 0 | 2 | MASCOT | T |
| R14009_38_3_5844  | K.YTISEADGHK.E        | 1120.52691 | -0.00209 | 2 | 1 | 61.78 | 0 | 6.64E-08 | 0 0 | R14009_38 | 5.32 | 0 |            |           | 0 | 2 | MASCOT | T |
| R14009_38_3_5866  | K.YTISEADGHK.E        | 1120.52691 | -0.00039 | 3 | 1 | 46.88 | 0 | 2.05E-06 | 0 0 | R14009_38 | 5.32 | 0 |            |           | 0 | 2 | MASCOT | T |
| R14009_38_3_5877  | K.YTISEADGHK.E        | 1120.52691 | -0.00247 | 2 | 1 | 61.75 | 0 | 6.68E-08 | 0 0 | R14009_38 | 5.32 | 0 |            |           | 0 | 2 | MASCOT | T |
| R14009_38_3_5899  | K.YTISEADGHK.E        | 1120.52691 | 0.00006  | 3 | 1 | 46.65 | 0 | 2.16E-06 | 0 0 | R14009_38 | 5.32 | 0 |            |           | 0 | 2 | MASCOT | T |
| R14009_38_3_5910  | K.YTISEADGHK.E        | 1120.52691 | -0.00197 | 2 | 1 | 57.66 | 0 | 1.71E-07 | 0 0 | R14009_38 | 5.32 | 0 |            |           | 0 | 2 | MASCOT | T |
| R14009_38_3_5932  | K.YTISEADGHK.E        | 1120.52691 | -0.00003 | 3 | 1 | 46.68 | 0 | 2.15E-06 | 0 0 | R14009_38 | 5.32 | 0 |            |           | 0 | 2 | MASCOT | T |
| R14009_38_3_5943  | K.YTISEADGHK.E        | 1120.52691 | -0.00101 | 2 | 1 | 61.7  | 0 | 6.76E-08 | 0 0 | R14009_38 | 5.32 | 0 |            |           | 0 | 2 | MASCOT | T |
| R14009_38_3_5966  | K.YTISEADGHK.E        | 1120.52691 | -0.00042 | 3 | 1 | 27.04 | 0 | 1.98E-04 | 0 0 | R14009_38 | 5.32 | 0 |            |           | 0 | 2 | MASCOT | T |
| R14009_38_3_5979  | K.YTISEADGHK.E        | 1120.52691 | -0.00067 | 2 | 1 | 61.62 | 0 | 6.89E-08 | 0 0 | R14009_38 | 5.32 | 0 |            |           | 0 | 2 | MASCOT | T |
| R14009_38_3_6012  | K.YTISEADGHK.E        | 1120.52691 | -0.00085 | 2 | 1 | 6     |   |          |     |           |      |   |            |           |   |   |        |   |

|                   |                       |            |          |   |   |        |   |          |     |           |      |   |   |   |        |   |
|-------------------|-----------------------|------------|----------|---|---|--------|---|----------|-----|-----------|------|---|---|---|--------|---|
| R14009_38_3_12572 | K.YTISEADGHKEWVSVR.F  | 2036.94945 | -0.00088 | 3 | 1 | 55.85  | 0 | 1.30E-07 | 0 0 | R14009_38 | 5.45 | 1 | 0 | 2 | MASCOT | T |
| R14009_38_3_12583 | K.YTISEADGHKEWVSVR.F  | 2036.94945 | -0.00145 | 4 | 1 | 34.58  | 0 | 1.74E-05 | 0 0 | R14009_38 | 5.45 | 1 | 0 | 2 | MASCOT | T |
| R14009_38_3_12584 | K.YTISEADGHKEWVSVR.F  | 2036.94945 | -0.00288 | 2 | 1 | 143.99 | 0 | 2.00E-16 | 0 0 | R14009_38 | 5.45 | 1 | 0 | 2 | MASCOT | T |
| R14009_38_3_12605 | K.YTISEADGHKEWVSVR.F  | 2036.94945 | 0.00002  | 3 | 1 | 55.78  | 0 | 1.32E-07 | 0 0 | R14009_38 | 5.45 | 1 | 0 | 2 | MASCOT | T |
| R14009_38_3_12615 | K.YTISEADGHKEWVSVR.F  | 2036.94945 | -0.00198 | 2 | 1 | 108.5  | 0 | 7.06E-13 | 0 0 | R14009_38 | 5.45 | 1 | 0 | 2 | MASCOT | T |
| R14009_38_3_12617 | K.YTISEADGHKEWVSVR.F  | 2036.94945 | -0.00141 | 4 | 1 | 37.84  | 0 | 8.22E-06 | 0 0 | R14009_38 | 5.45 | 1 | 0 | 2 | MASCOT | T |
| R14009_38_3_12638 | K.YTISEADGHKEWVSVR.F  | 2036.94945 | -0.00037 | 3 | 1 | 78.71  | 0 | 6.73E-10 | 0 0 | R14009_38 | 5.45 | 1 | 0 | 2 | MASCOT | T |
| R14009_38_3_12648 | K.YTISEADGHKEWVSVR.F  | 2036.94945 | -0.00186 | 2 | 1 | 150.81 | 0 | 4.15E-17 | 0 0 | R14009_38 | 5.45 | 1 | 0 | 2 | MASCOT | T |
| R14009_38_3_12649 | K.YTISEADGHKEWVSVR.F  | 2036.94945 | -0.00081 | 4 | 1 | 36.38  | 0 | 1.15E-05 | 0 0 | R14009_38 | 5.45 | 1 | 0 | 2 | MASCOT | T |
| R14009_38_3_12671 | K.YTISEADGHKEWVSVR.F  | 2036.94945 | -0.0004  | 3 | 1 | 67.1   | 0 | 9.75E-09 | 0 0 | R14009_38 | 5.45 | 1 | 0 | 2 | MASCOT | T |
| R14009_38_3_12682 | K.YTISEADGHKEWVSVR.F  | 2036.94945 | -0.00198 | 2 | 1 | 116.76 | 0 | 1.05E-13 | 0 0 | R14009_38 | 5.45 | 1 | 0 | 2 | MASCOT | T |
| R14009_38_3_12683 | K.YTISEADGHKEWVSVR.F  | 2036.94945 | -0.00161 | 4 | 1 | 31.81  | 0 | 3.30E-05 | 0 0 | R14009_38 | 5.45 | 1 | 0 | 2 | MASCOT | T |
| R14009_38_3_12704 | K.YTISEADGHKEWVSVR.F  | 2036.94945 | -0.00019 | 3 | 1 | 70.71  | 0 | 4.25E-09 | 0 0 | R14009_38 | 5.45 | 1 | 0 | 2 | MASCOT | T |
| R14009_38_3_12716 | K.YTISEADGHKEWVSVR.F  | 2036.94945 | -0.00232 | 2 | 1 | 115.81 | 0 | 1.31E-13 | 0 0 | R14009_38 | 5.45 | 1 | 0 | 2 | MASCOT | T |
| R14009_38_3_12717 | K.YTISEADGHKEWVSVR.F  | 2036.94945 | -0.00041 | 4 | 1 | 37.46  | 0 | 8.97E-06 | 0 0 | R14009_38 | 5.45 | 1 | 0 | 2 | MASCOT | T |
| R14009_38_3_12739 | K.YTISEADGHKEWVSVR.F  | 2036.94945 | -0.00019 | 3 | 1 | 49.69  | 0 | 5.37E-07 | 0 0 | R14009_38 | 5.45 | 1 | 0 | 2 | MASCOT | T |
| R14009_38_3_12752 | K.YTISEADGHKEWVSVR.F  | 2036.94945 | -0.00372 | 2 | 1 | 103.76 | 0 | 2.10E-12 | 0 0 | R14009_38 | 5.45 | 1 | 0 | 2 | MASCOT | T |
| R14009_38_3_12753 | K.YTISEADGHKEWVSVR.F  | 2036.94945 | -0.00145 | 4 | 1 | 26.33  | 0 | 1.16E-04 | 0 0 | R14009_38 | 5.45 | 1 | 0 | 2 | MASCOT | T |
| R14009_38_3_12772 | K.YTISEADGHKEWVSVR.F  | 2036.94945 | -0.00061 | 3 | 1 | 53.58  | 0 | 2.19E-07 | 0 0 | R14009_38 | 5.45 | 1 | 0 | 2 | MASCOT | T |
| R14009_38_3_12797 | K.YTISEADGHKEWVSVR.F  | 2036.94945 | -0.00278 | 2 | 1 | 60.49  | 0 | 4.47E-08 | 0 0 | R14009_38 | 5.45 | 1 | 0 | 2 | MASCOT | T |
| R14009_38_3_12807 | K.YTISEADGHKEWVSVR.F  | 2036.94945 | -0.00088 | 3 | 1 | 47.1   | 0 | 9.75E-07 | 0 0 | R14009_38 | 5.45 | 1 | 0 | 2 | MASCOT | T |
| R14009_38_3_12842 | K.YTISEADGHKEWVSVR.F  | 2036.94945 | -0.0016  | 2 | 1 | 53.01  | 0 | 2.50E-07 | 0 0 | R14009_38 | 5.45 | 1 | 0 | 2 | MASCOT | T |
| R14009_38_3_12851 | K.YTISEADGHKEWVSVR.F  | 2036.94945 | -0.00061 | 3 | 1 | 48.13  | 0 | 7.69E-07 | 0 0 | R14009_38 | 5.45 | 1 | 0 | 2 | MASCOT | T |
| R14009_38_3_12886 | K.YTISEADGHKEWVSVR.F  | 2036.94945 | -0.00082 | 2 | 1 | 50.42  | 0 | 4.54E-07 | 0 0 | R14009_38 | 5.45 | 1 | 0 | 2 | MASCOT | T |
| R14009_38_3_12894 | K.YTISEADGHKEWVSVR.F  | 2036.94945 | -0.00067 | 3 | 1 | 28.62  | 0 | 6.87E-05 | 0 0 | R14009_38 | 5.45 | 1 | 0 | 2 | MASCOT | T |
| R14009_38_3_13031 | K.YTISEADGHKEWVSVR.F  | 2036.94945 | -0.0034  | 3 | 1 | 34.87  | 0 | 1.63E-05 | 0 0 | R14009_38 | 5.45 | 1 | 0 | 2 | MASCOT | T |
| R14009_38_3_13097 | K.YTISEADGHKEWVSVR.F  | 2036.94945 | -0.00628 | 3 | 1 | 45.2   | 0 | 1.51E-06 | 0 0 | R14009_38 | 5.45 | 1 | 0 | 2 | MASCOT | T |
| R14009_38_3_8655  | M.AEGLVLK.G           | 729.4505   | 0.00023  | 2 | 1 | 40.1   | 0 | 4.89E-06 | 0 0 | R14009_38 | 6.05 | 0 | 0 | 2 | MASCOT | T |
| R14009_38_3_8710  | M.AEGLVLK.G           | 729.4505   | 0.00011  | 2 | 1 | 23.94  | 0 | 2.02E-04 | 0 0 | R14009_38 | 6.05 | 0 | 0 | 2 | MASCOT | T |
| R14009_38_3_8756  | M.AEGLVLK.G           | 729.4505   | -0.00039 | 2 | 1 | 32.39  | 0 | 2.88E-05 | 0 0 | R14009_38 | 6.05 | 0 | 0 | 2 | MASCOT | T |
| R14009_38_3_8801  | M.AEGLVLK.G           | 729.4505   | -0.00013 | 2 | 1 | 25     | 0 | 1.58E-04 | 0 0 | R14009_38 | 6.05 | 0 | 0 | 2 | MASCOT | T |
| R14009_38_3_14532 | R.DKSILWK.L           | 1002.59822 | -0.00065 | 2 | 1 | 29.36  | 0 | 5.79E-05 | 0 0 | R14009_38 | 8.59 | 1 | 0 | 2 | MASCOT | T |
| R14009_38_3_14562 | R.DKSILWK.L           | 1002.59822 | -0.00053 | 2 | 1 | 43.69  | 0 | 2.14E-06 | 0 0 | R14009_38 | 8.59 | 1 | 0 | 2 | MASCOT | T |
| R14009_38_3_14592 | R.DKSILWK.L           | 1002.59822 | 0.00091  | 3 | 1 | 25.22  | 0 | 1.50E-04 | 0 0 | R14009_38 | 8.59 | 1 | 0 | 2 | MASCOT | T |
| R14009_38_3_14595 | R.DKSILWK.L           | 1002.59822 | -0.00171 | 2 | 1 | 38.28  | 0 | 7.43E-06 | 0 0 | R14009_38 | 8.59 | 1 | 0 | 2 | MASCOT | T |
| R14009_38_3_14628 | R.DKSILWK.L           | 1002.59822 | -0.00191 | 2 | 1 | 37.98  | 0 | 7.96E-06 | 0 0 | R14009_38 | 8.59 | 1 | 0 | 2 | MASCOT | T |
| R14009_38_3_14642 | R.DKSILWK.L           | 1002.59822 | 0.00082  | 3 | 1 | 30.88  | 0 | 4.08E-05 | 0 0 | R14009_38 | 8.59 | 1 | 0 | 2 | MASCOT | T |
| R14009_38_3_14661 | R.DKSILWK.L           | 1002.59822 | -0.00305 | 2 | 1 | 39.51  | 0 | 5.60E-06 | 0 0 | R14009_38 | 8.59 | 1 | 0 | 2 | MASCOT | T |
| R14009_38_3_14675 | R.DKSILWK.L           | 1002.59822 | 0.0007   | 3 | 1 | 26     | 0 | 1.26E-04 | 0 0 | R14009_38 | 8.59 | 1 | 0 | 2 | MASCOT | T |
| R14009_38_3_14694 | R.DKSILWK.L           | 1002.59822 | -0.00179 | 2 | 1 | 43.84  | 0 | 2.07E-06 | 0 0 | R14009_38 | 8.59 | 1 | 0 | 2 | MASCOT | T |
| R14009_38_3_14707 | R.DKSILWK.L           | 1002.59822 | 0.00028  | 3 | 1 | 28.25  | 0 | 7.48E-05 | 0 0 | R14009_38 | 8.59 | 1 | 0 | 2 | MASCOT | T |
| R14009_38_3_14727 | R.DKSILWK.L           | 1002.59822 | -0.00349 | 2 | 1 | 37.56  | 0 | 8.77E-06 | 0 0 | R14009_38 | 8.59 | 1 | 0 | 2 | MASCOT | T |
| R14009_38_3_14740 | R.DKSILWK.L           | 1002.59822 | 0.00079  | 3 | 1 | 26.76  | 0 | 1.05E-04 | 0 0 | R14009_38 | 8.59 | 1 | 0 | 2 | MASCOT | T |
| R14009_38_3_14760 | R.DKSILWK.L           | 1002.59822 | -0.00323 | 2 | 1 | 37.25  | 0 | 9.42E-06 | 0 0 | R14009_38 | 8.59 | 1 | 0 | 2 | MASCOT | T |
| R14009_38_3_14773 | R.DKSILWK.L           | 1002.59822 | 0.00037  | 3 | 1 | 24.16  | 0 | 1.92E-04 | 0 0 | R14009_38 | 8.59 | 1 | 0 | 2 | MASCOT | T |
| R14009_38_3_14793 | R.DKSILWK.L           | 1002.59822 | -0.00317 | 2 | 1 | 48.64  | 0 | 6.84E-07 | 0 0 | R14009_38 | 8.59 | 1 | 0 | 2 | MASCOT | T |
| R14009_38_3_14806 | R.DKSILWK.L           | 1002.59822 | 0.00049  | 3 | 1 | 32.83  | 0 | 2.61E-05 | 0 0 | R14009_38 | 8.59 | 1 | 0 | 2 | MASCOT | T |
| R14009_38_3_14826 | R.DKSILWK.L           | 1002.59822 | -0.00265 | 2 | 1 | 42.21  | 0 | 3.01E-06 | 0 0 | R14009_38 | 8.59 | 1 | 0 | 2 | MASCOT | T |
| R14009_38_3_14839 | R.DKSILWK.L           | 1002.59822 | 0.00055  | 3 | 1 | 23.58  | 0 | 2.19E-04 | 0 0 | R14009_38 | 8.59 | 1 | 0 | 2 | MASCOT | T |
| R14009_38_3_14859 | R.DKSILWK.L           | 1002.59822 | -0.00287 | 2 | 1 | 48.65  | 0 | 6.82E-07 | 0 0 | R14009_38 | 8.59 | 1 | 0 | 2 | MASCOT | T |
| R14009_38_3_14872 | R.DKSILWK.L           | 1002.59822 | 0.00058  | 3 | 1 | 28.85  | 0 | 6.52E-05 | 0 0 | R14009_38 | 8.59 | 1 | 0 | 2 | MASCOT | T |
| R14009_38_3_14892 | R.DKSILWK.L           | 1002.59822 | -0.00309 | 2 | 1 | 36.42  | 0 | 1.14E-05 | 0 0 | R14009_38 | 8.59 | 1 | 0 | 2 | MASCOT | T |
| R14009_38_3_14907 | R.DKSILWK.L           | 1002.59822 | 0.00061  | 3 | 1 | 28.17  | 0 | 7.62E-05 | 0 0 | R14009_38 | 8.59 | 1 | 0 | 2 | MASCOT | T |
| R14009_38_3_14925 | R.DKSILWK.L           | 1002.59822 | -0.00169 | 2 | 1 | 38.31  | 0 | 7.38E-06 | 0 0 | R14009_38 | 8.59 | 1 | 0 | 2 | MASCOT | T |
| R14009_38_3_14958 | R.DKSILWK.L           | 1002.59822 | -0.00059 | 2 | 1 | 38.73  | 0 | 6.70E-06 | 0 0 | R14009_38 | 8.59 | 1 | 0 | 2 | MASCOT | T |
| R14009_38_3_14993 | R.DKSILWK.L           | 1002.59822 | -0.00025 | 2 | 1 | 40.46  | 0 | 4.50E-06 | 0 0 | R14009_38 | 8.59 | 1 | 0 | 2 | MASCOT | T |
| R14009_38_3_15028 | R.DKSILWK.L           | 1002.59822 | -0.00089 | 2 | 1 | 38.82  | 0 | 6.56E-06 | 0 0 | R14009_38 | 8.59 | 1 | 0 | 2 | MASCOT | T |
| R14009_38_3_23851 | R.FSPNTLVPTIVSASWDK.T | 1861.96945 | 0.007    | 2 | 1 | 45.3   | 0 | 1.48E-06 | 0 0 | R14009_38 | 5.84 | 0 | 0 | 2 | MASCOT | T |
| R14009_38_3_23896 | R.FSPNTLVPTIVSASWDK.T | 1861.96945 | 0.00246  | 2 | 1 | 41.7   | 0 | 3.38E-06 | 0 0 | R14009_38 | 5.84 | 0 | 0 | 2 | MASCOT | T |
| R14009_38_3_23940 | R.FSPNTLVPTIVSASWDK.T | 1861.96945 | -0.00008 | 2 | 1 | 38.95  | 0 | 6.37E-06 | 0 0 | R14009_38 | 5.84 | 0 | 0 | 2 | MASCOT | T |
| R14009_38_3_23983 | R.FSPNTLVPTIVSASWDK.T | 1861.96945 | -0.00006 | 2 | 1 | 54.72  | 0 | 1.69E-07 | 0 0 | R14009_38 | 5.84 | 0 | 0 | 2 | MASCOT | T |
| R14009_38_3_24027 | R.FSPNTLVPTIVSASWDK.T | 1861.96945 | -0.00118 | 2 | 1 | 53.73  | 0 | 2.12E-07 | 0 0 | R14009_38 | 5.84 | 0 | 0 | 2 | MASCOT | T |
| R14009_38_3_24432 | R.FSPNTLVPTIVSASWDK.T | 1861.96945 | -0.00138 | 2 | 1 | 68.84  | 0 | 6.53E-09 | 0 0 | R14009_38 | 5.84 | 0 | 0 | 2 | MASCOT | T |
| R14009_38_3_24464 | R.FSPNTLVPTIVSASWDK.T | 1861.96945 | -0.00162 | 2 | 1 | 57.19  | 0 | 9.55E-08 | 0 0 | R14009_38 | 5.84 | 0 | 0 | 2 | MASCOT | T |
| R14009_38_3_24497 | R.FSPNTLVPTIVSASWDK.T | 1861.96945 | -0.00088 | 2 | 1 | 68.77  | 0 | 6.64E-09 | 0 0 | R14009_38 | 5.84 | 0 | 0 | 2 | MASCOT | T |
| R14009_38_3_24530 | R.FSPNTLVPTIVSASWDK.T | 1861.96945 | -0.00074 | 2 | 1 | 79.2   | 0 | 6.01E-10 | 0 0 | R14009_38 | 5.84 | 0 | 0 | 2 | MASCOT | T |
| R14009_38_3_24561 | R.FSPNTLVPTIVSASWDK.T | 1861.96945 | 0.00096  | 2 | 1 | 83.79  | 0 | 2.09E-10 | 0 0 | R14009_38 | 5.84 | 0 | 0 | 2 | MASCOT | T |
| R14009_38_3_24566 | R.FSPNTLVPTIVSASWDK.T | 1861.96945 | 0.00135  | 3 | 1 | 34.49  | 0 | 1.78E-05 | 0 0 | R14009_38 | 5.84 | 0 | 0 | 2 | MASCOT | T |
| R14009_38_3_24594 | R.FSPNTLVPTIVSASWDK.T | 1861.96945 | -0.00002 | 2 | 1 | 82.82  | 0 | 2.61E-10 | 0 0 | R14009_38 | 5.84 | 0 | 0 | 2 | MASCOT | T |
| R14009_38_3_24610 | R.FSPNTLVPTIVSASWDK.T | 1861.96945 | 0.00036  | 3 | 1 | 45.56  | 0 | 1.39E-06 | 0 0 | R14009_38 | 5.84 | 0 | 0 | 2 | MASCOT | T |
| R14009_38_3_24627 | R.FSPNTLVPTIVSASWDK.T | 1861.96945 | -0.00012 | 2 | 1 | 69.59  | 0 | 5.50E-09 | 0 0 | R14009_38 | 5.84 | 0 | 0 | 2 | MASCOT | T |
| R14009_38_3_24655 | R.FSPNTLVPTIVSASWDK.T | 1861.96945 | -0.00174 | 3 | 1 | 43.55  | 0 | 2.21E-06 | 0 0 | R14009_38 | 5.84 | 0 | 0 | 2 | MASCOT | T |
| R14009_38_3_24660 | R.FSPNTLVPTIVSASWDK.T | 1861.96945 | 0.00014  | 2 | 1 | 83     | 0 | 2.51E-10 | 0 0 | R14009_38 | 5.84 | 0 | 0 | 2 | MASCOT | T |



|                   |                       |            |          |   |   |       |   |          |   |           |      |   |   |   |        |   |
|-------------------|-----------------------|------------|----------|---|---|-------|---|----------|---|-----------|------|---|---|---|--------|---|
| R14009_38_3_24693 | R.FSPNTLVPTIVSASWDK.T | 1861.96945 | 0.00044  | 2 | 1 | 78.31 | 0 | 7.38E-10 | 0 | R14009_38 | 5.84 | 0 | 0 | 2 | MASCOT | T |
| R14009_38_3_24696 | R.FSPNTLVPTIVSASWDK.T | 1861.96945 | -0.00096 | 3 | 1 | 40.4  | 0 | 4.56E-06 | 0 | R14009_38 | 5.84 | 0 | 0 | 2 | MASCOT | T |
| R14009_38_3_24726 | R.FSPNTLVPTIVSASWDK.T | 1861.96945 | 0.0008   | 2 | 1 | 76.97 | 0 | 1.00E-09 | 0 | R14009_38 | 5.84 | 0 | 0 | 2 | MASCOT | T |
| R14009_38_3_24727 | R.FSPNTLVPTIVSASWDK.T | 1861.96945 | -0.00066 | 3 | 1 | 42.05 | 0 | 3.12E-06 | 0 | R14009_38 | 5.84 | 0 | 0 | 2 | MASCOT | T |
| R14009_38_3_24759 | R.FSPNTLVPTIVSASWDK.T | 1861.96945 | 0.00082  | 2 | 1 | 79.71 | 0 | 5.35E-10 | 0 | R14009_38 | 5.84 | 0 | 0 | 2 | MASCOT | T |
| R14009_38_3_24760 | R.FSPNTLVPTIVSASWDK.T | 1861.96945 | -0.00015 | 3 | 1 | 43.67 | 0 | 2.15E-06 | 0 | R14009_38 | 5.84 | 0 | 0 | 2 | MASCOT | T |
| R14009_38_3_24791 | R.FSPNTLVPTIVSASWDK.T | 1861.96945 | -0.0055  | 2 | 1 | 83.96 | 0 | 2.01E-10 | 0 | R14009_38 | 5.84 | 0 | 0 | 2 | MASCOT | T |
| R14009_38_3_24792 | R.FSPNTLVPTIVSASWDK.T | 1861.96945 | -0.0006  | 3 | 1 | 43.33 | 0 | 2.32E-06 | 0 | R14009_38 | 5.84 | 0 | 0 | 2 | MASCOT | T |
| R14009_38_3_24824 | R.FSPNTLVPTIVSASWDK.T | 1861.96945 | 0.00098  | 2 | 1 | 83.19 | 0 | 2.40E-10 | 0 | R14009_38 | 5.84 | 0 | 0 | 2 | MASCOT | T |
| R14009_38_3_24826 | R.FSPNTLVPTIVSASWDK.T | 1861.96945 | -0.00075 | 3 | 1 | 43.25 | 0 | 2.37E-06 | 0 | R14009_38 | 5.84 | 0 | 0 | 2 | MASCOT | T |
| R14009_38_3_24857 | R.FSPNTLVPTIVSASWDK.T | 1861.96945 | -0.00584 | 2 | 1 | 83.93 | 0 | 2.02E-10 | 0 | R14009_38 | 5.84 | 0 | 0 | 2 | MASCOT | T |
| R14009_38_3_24858 | R.FSPNTLVPTIVSASWDK.T | 1861.96945 | -0.00045 | 3 | 1 | 38.47 | 0 | 7.11E-06 | 0 | R14009_38 | 5.84 | 0 | 0 | 2 | MASCOT | T |
| R14009_38_3_24892 | R.FSPNTLVPTIVSASWDK.T | 1861.96945 | -0.00021 | 3 | 1 | 64.65 | 0 | 1.71E-08 | 0 | R14009_38 | 5.84 | 0 | 0 | 2 | MASCOT | T |
| R14009_38_3_24893 | R.FSPNTLVPTIVSASWDK.T | 1861.96945 | -0.00688 | 2 | 1 | 82.7  | 0 | 2.69E-10 | 0 | R14009_38 | 5.84 | 0 | 0 | 2 | MASCOT | T |
| R14009_38_3_24923 | R.FSPNTLVPTIVSASWDK.T | 1861.96945 | -0.00642 | 2 | 1 | 83.88 | 0 | 2.05E-10 | 0 | R14009_38 | 5.84 | 0 | 0 | 2 | MASCOT | T |
| R14009_38_3_24927 | R.FSPNTLVPTIVSASWDK.T | 1861.96945 | -0.00096 | 3 | 1 | 41.76 | 0 | 3.33E-06 | 0 | R14009_38 | 5.84 | 0 | 0 | 2 | MASCOT | T |
| R14009_38_3_24956 | R.FSPNTLVPTIVSASWDK.T | 1861.96945 | -0.00536 | 2 | 1 | 84.86 | 0 | 1.63E-10 | 0 | R14009_38 | 5.84 | 0 | 0 | 2 | MASCOT | T |
| R14009_38_3_24971 | R.FSPNTLVPTIVSASWDK.T | 1861.96945 | 0.00024  | 3 | 1 | 53.17 | 0 | 2.41E-07 | 0 | R14009_38 | 5.84 | 0 | 0 | 2 | MASCOT | T |
| R14009_38_3_24989 | R.FSPNTLVPTIVSASWDK.T | 1861.96945 | -0.00004 | 2 | 1 | 76.66 | 0 | 1.08E-09 | 0 | R14009_38 | 5.84 | 0 | 0 | 2 | MASCOT | T |
| R14009_38_3_25020 | R.FSPNTLVPTIVSASWDK.T | 1861.96945 | 0.00072  | 3 | 1 | 28.47 | 0 | 7.11E-05 | 0 | R14009_38 | 5.84 | 0 | 0 | 2 | MASCOT | T |
| R14009_38_3_25022 | R.FSPNTLVPTIVSASWDK.T | 1861.96945 | -0.0008  | 2 | 1 | 87.9  | 0 | 8.11E-11 | 0 | R14009_38 | 5.84 | 0 | 0 | 2 | MASCOT | T |
| R14009_38_3_25055 | R.FSPNTLVPTIVSASWDK.T | 1861.96945 | -0.00194 | 2 | 1 | 71.97 | 0 | 3.18E-09 | 0 | R14009_38 | 5.84 | 0 | 0 | 2 | MASCOT | T |
| R14009_38_3_25088 | R.FSPNTLVPTIVSASWDK.T | 1861.96945 | -0.00158 | 2 | 1 | 78.22 | 0 | 7.53E-10 | 0 | R14009_38 | 5.84 | 0 | 0 | 2 | MASCOT | T |
| R14009_38_3_25122 | R.FSPNTLVPTIVSASWDK.T | 1861.96945 | -0.00218 | 2 | 1 | 73.19 | 0 | 2.40E-09 | 0 | R14009_38 | 5.84 | 0 | 0 | 2 | MASCOT | T |
| R14009_38_3_25156 | R.FSPNTLVPTIVSASWDK.T | 1861.96945 | -0.0031  | 2 | 1 | 33.75 | 0 | 2.11E-05 | 0 | R14009_38 | 5.84 | 0 | 0 | 2 | MASCOT | T |
| R14009_38_3_25188 | R.FSPNTLVPTIVSASWDK.T | 1861.96945 | -0.00274 | 2 | 1 | 31.27 | 0 | 3.73E-05 | 0 | R14009_38 | 5.84 | 0 | 0 | 2 | MASCOT | T |
| R14009_38_3_25226 | R.FSPNTLVPTIVSASWDK.T | 1861.96945 | -0.00056 | 2 | 1 | 36.61 | 0 | 1.09E-05 | 0 | R14009_38 | 5.84 | 0 | 0 | 2 | MASCOT | T |
| R14009_38_3_25269 | R.FSPNTLVPTIVSASWDK.T | 1861.96945 | -0.00264 | 2 | 1 | 24.03 | 0 | 1.98E-04 | 0 | R14009_38 | 5.84 | 0 | 0 | 2 | MASCOT | T |
| R14009_38_3_25381 | R.FSPNTLVPTIVSASWDK.T | 1861.96945 | 0.0021   | 2 | 1 | 38.71 | 0 | 6.73E-06 | 0 | R14009_38 | 5.84 | 0 | 0 | 2 | MASCOT | T |
| R14009_38_3_25424 | R.FSPNTLVPTIVSASWDK.T | 1861.96945 | -0.0004  | 2 | 1 | 46.03 | 0 | 1.25E-06 | 0 | R14009_38 | 5.84 | 0 | 0 | 2 | MASCOT | T |
| R14009_38_3_13282 | R.IWDLESK.S           | 890.46179  | 0.00091  | 2 | 1 | 24.08 | 0 | 1.95E-04 | 0 | R14009_38 | 4.37 | 0 | 0 | 2 | MASCOT | T |
| R14009_38_3_13322 | R.IWDLESK.S           | 890.46179  | -0.00011 | 2 | 1 | 28.57 | 0 | 6.95E-05 | 0 | R14009_38 | 4.37 | 0 | 0 | 2 | MASCOT | T |
| R14009_38_3_13366 | R.IWDLESK.S           | 890.46179  | -0.00025 | 2 | 1 | 28.67 | 0 | 6.79E-05 | 0 | R14009_38 | 4.37 | 0 | 0 | 2 | MASCOT | T |
| R14009_38_3_13408 | R.IWDLESK.S           | 890.46179  | 0.00003  | 2 | 1 | 28.79 | 0 | 6.61E-05 | 0 | R14009_38 | 4.37 | 0 | 0 | 2 | MASCOT | T |
| R14009_38_3_13440 | R.IWDLESK.S           | 890.46179  | 0.00125  | 2 | 1 | 28.79 | 0 | 6.61E-05 | 0 | R14009_38 | 4.37 | 0 | 0 | 2 | MASCOT | T |
| R14009_38_3_13473 | R.IWDLESK.S           | 890.46179  | 0.00201  | 2 | 1 | 28.76 | 0 | 6.65E-05 | 0 | R14009_38 | 4.37 | 0 | 0 | 2 | MASCOT | T |
| R14009_38_3_13506 | R.IWDLESK.S           | 890.46179  | 0.00241  | 2 | 1 | 28.82 | 0 | 6.56E-05 | 0 | R14009_38 | 4.37 | 0 | 0 | 2 | MASCOT | T |
| R14009_38_3_13539 | R.IWDLESK.S           | 890.46179  | 0.00295  | 2 | 1 | 26.71 | 0 | 1.07E-04 | 0 | R14009_38 | 4.37 | 0 | 0 | 2 | MASCOT | T |
| R14009_38_3_13572 | R.IWDLESK.S           | 890.46179  | 0.00305  | 2 | 1 | 28.79 | 0 | 6.61E-05 | 0 | R14009_38 | 4.37 | 0 | 0 | 2 | MASCOT | T |
| R14009_38_3_13605 | R.IWDLESK.S           | 890.46179  | 0.00317  | 2 | 1 | 28.77 | 0 | 6.64E-05 | 0 | R14009_38 | 4.37 | 0 | 0 | 2 | MASCOT | T |
| R14009_38_3_13638 | R.IWDLESK.S           | 890.46179  | 0.00269  | 2 | 1 | 28.8  | 0 | 6.59E-05 | 0 | R14009_38 | 4.37 | 0 | 0 | 2 | MASCOT | T |
| R14009_38_3_13671 | R.IWDLESK.S           | 890.46179  | 0.00267  | 2 | 1 | 28.02 | 0 | 7.89E-05 | 0 | R14009_38 | 4.37 | 0 | 0 | 2 | MASCOT | T |
| R14009_38_3_13704 | R.IWDLESK.S           | 890.46179  | 0.00197  | 2 | 1 | 28.79 | 0 | 6.61E-05 | 0 | R14009_38 | 4.37 | 0 | 0 | 2 | MASCOT | T |
| R14009_38_3_13738 | R.IWDLESK.S           | 890.46179  | 0.00113  | 2 | 1 | 28.7  | 0 | 6.74E-05 | 0 | R14009_38 | 4.37 | 0 | 0 | 2 | MASCOT | T |
| R14009_38_3_13771 | R.IWDLESK.S           | 890.46179  | 0.00007  | 2 | 1 | 28.47 | 0 | 7.11E-05 | 0 | R14009_38 | 4.37 | 0 | 0 | 2 | MASCOT | T |
| R14009_38_3_13805 | R.IWDLESK.S           | 890.46179  | 0.00015  | 2 | 1 | 28.59 | 0 | 6.92E-05 | 0 | R14009_38 | 4.37 | 0 | 0 | 2 | MASCOT | T |
| R14009_38_3_13839 | R.IWDLESK.S           | 890.46179  | -0.00005 | 2 | 1 | 30.29 | 0 | 4.68E-05 | 0 | R14009_38 | 4.37 | 0 | 0 | 2 | MASCOT | T |
| R14009_38_3_13871 | R.IWDLESK.S           | 890.46179  | -0.00029 | 2 | 1 | 23.54 | 0 | 2.21E-04 | 0 | R14009_38 | 4.37 | 0 | 0 | 2 | MASCOT | T |
| R14009_38_3_13909 | R.IWDLESK.S           | 890.46179  | 0.00001  | 2 | 1 | 26.76 | 0 | 1.05E-04 | 0 | R14009_38 | 4.37 | 0 | 0 | 2 | MASCOT | T |
| R14009_38_3_14172 | R.LWDLATGESTR.R       | 1248.62189 | -0.0001  | 2 | 1 | 38.11 | 0 | 7.73E-06 | 0 | R14009_38 | 4.37 | 0 | 0 | 2 | MASCOT | T |
| R14009_38_3_15393 | R.LWDLATGESTR.R       | 1248.62189 | -0.00106 | 2 | 1 | 53.99 | 0 | 2.00E-07 | 0 | R14009_38 | 4.37 | 0 | 0 | 2 | MASCOT | T |
| R14009_38_3_15431 | R.LWDLATGESTR.R       | 1248.62189 | -0.0004  | 2 | 1 | 43.71 | 0 | 2.13E-06 | 0 | R14009_38 | 4.37 | 0 | 0 | 2 | MASCOT | T |
| R14009_38_3_15464 | R.LWDLATGESTR.R       | 1248.62189 | -0.00114 | 2 | 1 | 47.29 | 0 | 9.33E-07 | 0 | R14009_38 | 4.37 | 0 | 0 | 2 | MASCOT | T |
| R14009_38_3_15497 | R.LWDLATGESTR.R       | 1248.62189 | -0.00156 | 2 | 1 | 49.2  | 0 | 6.01E-07 | 0 | R14009_38 | 4.37 | 0 | 0 | 2 | MASCOT | T |
| R14009_38_3_15530 | R.LWDLATGESTR.R       | 1248.62189 | -0.00228 | 2 | 1 | 47.39 | 0 | 9.12E-07 | 0 | R14009_38 | 4.37 | 0 | 0 | 2 | MASCOT | T |
| R14009_38_3_15587 | R.LWDLATGESTR.R       | 1248.62189 | -0.00336 | 2 | 1 | 47.42 | 0 | 9.06E-07 | 0 | R14009_38 | 4.37 | 0 | 0 | 2 | MASCOT | T |
| R14009_38_3_15764 | R.LWDLATGESTR.R       | 1248.62189 | -0.00376 | 2 | 1 | 47    | 0 | 9.98E-07 | 0 | R14009_38 | 4.37 | 0 | 0 | 2 | MASCOT | T |
| R14009_38_3_15794 | R.LWDLATGESTR.R       | 1248.62189 | -0.0032  | 2 | 1 | 48.6  | 0 | 6.90E-07 | 0 | R14009_38 | 4.37 | 0 | 0 | 2 | MASCOT | T |
| R14009_38_3_15827 | R.LWDLATGESTR.R       | 1248.62189 | -0.0009  | 2 | 1 | 49.27 | 0 | 5.92E-07 | 0 | R14009_38 | 4.37 | 0 | 0 | 2 | MASCOT | T |
| R14009_38_3_15861 | R.LWDLATGESTR.R       | 1248.62189 | 0.00004  | 2 | 1 | 53.29 | 0 | 2.34E-07 | 0 | R14009_38 | 4.37 | 0 | 0 | 2 | MASCOT | T |
| R14009_38_3_15894 | R.LWDLATGESTR.R       | 1248.62189 | 0.00004  | 2 | 1 | 53.91 | 0 | 2.03E-07 | 0 | R14009_38 | 4.37 | 0 | 0 | 2 | MASCOT | T |
| R14009_38_3_15928 | R.LWDLATGESTR.R       | 1248.62189 | 0.00024  | 2 | 1 | 62.64 | 0 | 2.72E-08 | 0 | R14009_38 | 4.37 | 0 | 0 | 2 | MASCOT | T |
| R14009_38_3_15964 | R.LWDLATGESTR.R       | 1248.62189 | 0.00104  | 2 | 1 | 52.18 | 0 | 3.03E-07 | 0 | R14009_38 | 4.37 | 0 | 0 | 2 | MASCOT | T |
| R14009_38_3_16012 | R.LWDLATGESTR.R       | 1248.62189 | 0.00142  | 2 | 1 | 62.11 | 0 | 3.08E-08 | 0 | R14009_38 | 4.37 | 0 | 0 | 2 | MASCOT | T |
| R14009_38_3_16055 | R.LWDLATGESTR.R       | 1248.62189 | 0.00252  | 2 | 1 | 47.7  | 0 | 8.49E-07 | 0 | R14009_38 | 4.37 | 0 | 0 | 2 | MASCOT | T |
| R14009_38_3_16098 | R.LWDLATGESTR.R       | 1248.62189 | 0.00274  | 2 | 1 | 62.24 | 0 | 2.99E-08 | 0 | R14009_38 | 4.37 | 0 | 0 | 2 | MASCOT | T |
| R14009_38_3_16144 | R.LWDLATGESTR.R       | 1248.62189 | 0.00282  | 2 | 1 | 44.34 | 0 | 1.84E-06 | 0 | R14009_38 | 4.37 | 0 | 0 | 2 | MASCOT | T |
| R14009_38_3_16185 | R.LWDLATGESTR.R       | 1248.62189 | 0.0029   | 2 | 1 | 37.02 | 0 | 9.93E-06 | 0 | R14009_38 | 4.37 | 0 | 0 | 2 | MASCOT | T |
| R14009_38_3_16231 | R.LWDLATGESTR.R       | 1248.62189 | 0.00388  | 2 | 1 | 20.29 | 0 | 4.68E-04 | 0 | R14009_38 | 4.37 | 0 | 0 | 2 | MASCOT | T |
| R14009_38_3_16274 | R.LWDLATGESTR.R       | 1248.62189 | 0.00308  | 2 | 1 | 33.76 | 0 | 2.10E-05 | 0 | R14009_38 | 4.37 | 0 | 0 | 2 | MASCOT | T |
| R14009_38_3_16375 | R.LWDLATGESTR.R       | 1248.62189 | 0.0023   | 2 | 1 | 46.43 | 0 | 1.14E-06 | 0 | R14009_38 | 4.37 | 0 | 0 | 2 | MASCOT | T |
| R14009_38_3_16416 | R.LWDLATGESTR.R       | 1248.62189 | 0.00248  | 2 | 1 | 35.99 | 0 | 1.26E-05 | 0 | R14009_38 | 4.37 | 0 | 0 | 2 | MASCOT | T |
| R14009_38_3_13321 | R.LWDLATGESTRR.F      | 1404.72299 | 0.00069  | 2 | 1 | 40.86 | 0 | 4.10E-06 | 0 | R14009_38 | 6.07 | 1 | 0 | 2 | MASCOT | T |

|                   |                        |            |          |   |   |       |   |          |     |           |      |   |   |   |        |   |
|-------------------|------------------------|------------|----------|---|---|-------|---|----------|-----|-----------|------|---|---|---|--------|---|
| R14009_38_3_13332 | R.LWDLATGESTRRR.F      | 1404.72299 | -0.00158 | 3 | 1 | 25.9  | 0 | 1.29E-04 | 0 0 | R14009_38 | 6.07 | 1 | 0 | 2 | MASCOT | T |
| R14009_38_3_13352 | R.LWDLATGESTRRR.F      | 1404.72299 | 0.00129  | 2 | 1 | 39.15 | 0 | 6.08E-06 | 0 0 | R14009_38 | 6.07 | 1 | 0 | 2 | MASCOT | T |
| R14009_38_3_13365 | R.LWDLATGESTRRR.F      | 1404.72299 | -0.00212 | 3 | 1 | 24.9  | 0 | 1.62E-04 | 0 0 | R14009_38 | 6.07 | 1 | 0 | 2 | MASCOT | T |
| R14009_38_3_13385 | R.LWDLATGESTRRR.F      | 1404.72299 | 0.00133  | 2 | 1 | 44.5  | 0 | 1.77E-06 | 0 0 | R14009_38 | 6.07 | 1 | 0 | 2 | MASCOT | T |
| R14009_38_3_13396 | R.LWDLATGESTRRR.F      | 1404.72299 | -0.00164 | 3 | 1 | 26.74 | 0 | 1.06E-04 | 0 0 | R14009_38 | 6.07 | 1 | 0 | 2 | MASCOT | T |
| R14009_38_3_13418 | R.LWDLATGESTRRR.F      | 1404.72299 | 0.00305  | 2 | 1 | 35.62 | 0 | 1.37E-05 | 0 0 | R14009_38 | 6.07 | 1 | 0 | 2 | MASCOT | T |
| R14009_38_3_13429 | R.LWDLATGESTRRR.F      | 1404.72299 | 0.00088  | 3 | 1 | 24.86 | 0 | 1.63E-04 | 0 0 | R14009_38 | 6.07 | 1 | 0 | 2 | MASCOT | T |
| R14009_38_3_13451 | R.LWDLATGESTRRR.F      | 1404.72299 | 0.00517  | 2 | 1 | 39.05 | 0 | 6.22E-06 | 0 0 | R14009_38 | 6.07 | 1 | 0 | 2 | MASCOT | T |
| R14009_38_3_13462 | R.LWDLATGESTRRR.F      | 1404.72299 | 0.00304  | 3 | 1 | 24.91 | 0 | 1.61E-04 | 0 0 | R14009_38 | 6.07 | 1 | 0 | 2 | MASCOT | T |
| R14009_38_3_13484 | R.LWDLATGESTRRR.F      | 1404.72299 | 0.00653  | 2 | 1 | 41.33 | 0 | 3.68E-06 | 0 0 | R14009_38 | 6.07 | 1 | 0 | 2 | MASCOT | T |
| R14009_38_3_13495 | R.LWDLATGESTRRR.F      | 1404.72299 | 0.00457  | 3 | 1 | 24.88 | 0 | 1.63E-04 | 0 0 | R14009_38 | 6.07 | 1 | 0 | 2 | MASCOT | T |
| R14009_38_3_13517 | R.LWDLATGESTRRR.F      | 1404.72299 | 0.00791  | 2 | 1 | 39.41 | 0 | 5.73E-06 | 0 0 | R14009_38 | 6.07 | 1 | 0 | 2 | MASCOT | T |
| R14009_38_3_13528 | R.LWDLATGESTRRR.F      | 1404.72299 | 0.00547  | 3 | 1 | 23.93 | 0 | 2.02E-04 | 0 0 | R14009_38 | 6.07 | 1 | 0 | 2 | MASCOT | T |
| R14009_38_3_13550 | R.LWDLATGESTRRR.F      | 1404.72299 | 0.01003  | 2 | 1 | 36.65 | 0 | 1.08E-05 | 0 0 | R14009_38 | 6.07 | 1 | 0 | 2 | MASCOT | T |
| R14009_38_3_13561 | R.LWDLATGESTRRR.F      | 1404.72299 | 0.0064   | 3 | 1 | 26.4  | 0 | 1.15E-04 | 0 0 | R14009_38 | 6.07 | 1 | 0 | 2 | MASCOT | T |
| R14009_38_3_13583 | R.LWDLATGESTRRR.F      | 1404.72299 | 0.01005  | 2 | 1 | 38.65 | 0 | 6.82E-06 | 0 0 | R14009_38 | 6.07 | 1 | 0 | 2 | MASCOT | T |
| R14009_38_3_13595 | R.LWDLATGESTRRR.F      | 1404.72299 | 0.00775  | 3 | 1 | 26.78 | 0 | 1.05E-04 | 0 0 | R14009_38 | 6.07 | 1 | 0 | 2 | MASCOT | T |
| R14009_38_3_13616 | R.LWDLATGESTRRR.F      | 1404.72299 | 0.00957  | 2 | 1 | 46.71 | 0 | 1.07E-06 | 0 0 | R14009_38 | 6.07 | 1 | 0 | 2 | MASCOT | T |
| R14009_38_3_13628 | R.LWDLATGESTRRR.F      | 1404.72299 | 0.00802  | 3 | 1 | 30.95 | 0 | 4.02E-05 | 0 0 | R14009_38 | 6.07 | 1 | 0 | 2 | MASCOT | T |
| R14009_38_3_13650 | R.LWDLATGESTRRR.F      | 1404.72299 | 0.00965  | 2 | 1 | 31.36 | 0 | 3.66E-05 | 0 0 | R14009_38 | 6.07 | 1 | 0 | 2 | MASCOT | T |
| R14009_38_3_13666 | R.LWDLATGESTRRR.F      | 1404.72299 | 0.00775  | 3 | 1 | 24.56 | 0 | 1.75E-04 | 0 0 | R14009_38 | 6.07 | 1 | 0 | 2 | MASCOT | T |
| R14009_38_3_13689 | R.LWDLATGESTRRR.F      | 1404.72299 | 0.00853  | 2 | 1 | 29.35 | 0 | 5.81E-05 | 0 0 | R14009_38 | 6.07 | 1 | 0 | 2 | MASCOT | T |
| R14009_38_3_15481 | R.NTLAGHSGYLNTVAVSPDGS | 2633.26242 | 0.0047   | 3 | 1 | 61.56 | 0 | 3.49E-08 | 0 0 | R14009_38 | 6.73 | 0 | 0 | 2 | MASCOT | T |
| R14009_38_3_15521 | R.NTLAGHSGYLNTVAVSPDGS | 2633.26242 | 0.00155  | 3 | 1 | 79.71 | 0 | 5.35E-10 | 0 0 | R14009_38 | 6.73 | 0 | 0 | 2 | MASCOT | T |
| R14009_38_3_15554 | R.NTLAGHSGYLNTVAVSPDGS | 2633.26242 | 0.00164  | 3 | 1 | 79.16 | 0 | 6.07E-10 | 0 0 | R14009_38 | 6.73 | 0 | 0 | 2 | MASCOT | T |
| R14009_38_3_15588 | R.NTLAGHSGYLNTVAVSPDGS | 2633.26242 | 0.00083  | 3 | 1 | 89.62 | 0 | 5.46E-11 | 0 0 | R14009_38 | 6.73 | 0 | 0 | 2 | MASCOT | T |
| R14009_38_3_15620 | R.NTLAGHSGYLNTVAVSPDGS | 2633.26242 | -0.00022 | 3 | 1 | 88.95 | 0 | 6.37E-11 | 0 0 | R14009_38 | 6.73 | 0 | 0 | 2 | MASCOT | T |
| R14009_38_3_15652 | R.NTLAGHSGYLNTVAVSPDGS | 2633.26242 | -0.00049 | 3 | 1 | 94.46 | 0 | 1.79E-11 | 0 0 | R14009_38 | 6.73 | 0 | 0 | 2 | MASCOT | T |
| R14009_38_3_15685 | R.NTLAGHSGYLNTVAVSPDGS | 2633.26242 | -0.00043 | 3 | 1 | 83.4  | 0 | 2.29E-10 | 0 0 | R14009_38 | 6.73 | 0 | 0 | 2 | MASCOT | T |
| R14009_38_3_15718 | R.NTLAGHSGYLNTVAVSPDGS | 2633.26242 | -0.00094 | 3 | 1 | 92.62 | 0 | 2.74E-11 | 0 0 | R14009_38 | 6.73 | 0 | 0 | 2 | MASCOT | T |
| R14009_38_3_15732 | R.NTLAGHSGYLNTVAVSPDGS | 2633.26242 | -0.00175 | 2 | 1 | 40.46 | 0 | 4.50E-06 | 0 0 | R14009_38 | 6.73 | 0 | 0 | 2 | MASCOT | T |
| R14009_38_3_15752 | R.NTLAGHSGYLNTVAVSPDGS | 2633.26242 | -0.00256 | 3 | 1 | 87.42 | 0 | 9.06E-11 | 0 0 | R14009_38 | 6.73 | 0 | 0 | 2 | MASCOT | T |
| R14009_38_3_15785 | R.NTLAGHSGYLNTVAVSPDGS | 2633.26242 | -0.00313 | 3 | 1 | 93.65 | 0 | 2.16E-11 | 0 0 | R14009_38 | 6.73 | 0 | 0 | 2 | MASCOT | T |
| R14009_38_3_15818 | R.NTLAGHSGYLNTVAVSPDGS | 2633.26242 | -0.00283 | 3 | 1 | 84.84 | 0 | 1.64E-10 | 0 0 | R14009_38 | 6.73 | 0 | 0 | 2 | MASCOT | T |
| R14009_38_3_15851 | R.NTLAGHSGYLNTVAVSPDGS | 2633.26242 | -0.00121 | 3 | 1 | 99.06 | 0 | 6.21E-12 | 0 0 | R14009_38 | 6.73 | 0 | 0 | 2 | MASCOT | T |
| R14009_38_3_15896 | R.NTLAGHSGYLNTVAVSPDGS | 2633.26242 | -0.00106 | 3 | 1 | 99.46 | 0 | 5.66E-12 | 0 0 | R14009_38 | 6.73 | 0 | 0 | 2 | MASCOT | T |
| R14009_38_3_15929 | R.NTLAGHSGYLNTVAVSPDGS | 2633.26242 | -0.00205 | 3 | 1 | 91.06 | 0 | 3.92E-11 | 0 0 | R14009_38 | 6.73 | 0 | 0 | 2 | MASCOT | T |
| R14009_38_3_15963 | R.NTLAGHSGYLNTVAVSPDGS | 2633.26242 | -0.0001  | 3 | 1 | 89.41 | 0 | 5.73E-11 | 0 0 | R14009_38 | 6.73 | 0 | 0 | 2 | MASCOT | T |
| R14009_38_3_16008 | R.NTLAGHSGYLNTVAVSPDGS | 2633.26242 | -0.00139 | 3 | 1 | 86.85 | 0 | 1.03E-10 | 0 0 | R14009_38 | 6.73 | 0 | 0 | 2 | MASCOT | T |
| R14009_38_3_16052 | R.NTLAGHSGYLNTVAVSPDGS | 2633.26242 | -0.001   | 3 | 1 | 75.98 | 0 | 1.26E-09 | 0 0 | R14009_38 | 6.73 | 0 | 0 | 2 | MASCOT | T |
| R14009_38_3_16095 | R.NTLAGHSGYLNTVAVSPDGS | 2633.26242 | -0.00031 | 3 | 1 | 80.15 | 0 | 4.83E-10 | 0 0 | R14009_38 | 6.73 | 0 | 0 | 2 | MASCOT | T |
| R14009_38_3_16141 | R.NTLAGHSGYLNTVAVSPDGS | 2633.26242 | -0.00028 | 3 | 1 | 69.43 | 0 | 5.70E-09 | 0 0 | R14009_38 | 6.73 | 0 | 0 | 2 | MASCOT | T |
| R14009_38_3_16198 | R.NTLAGHSGYLNTVAVSPDGS | 2633.26242 | -0.0019  | 3 | 1 | 60.17 | 0 | 4.81E-08 | 0 0 | R14009_38 | 6.73 | 0 | 0 | 2 | MASCOT | T |
| R14009_38_3_16240 | R.NTLAGHSGYLNTVAVSPDGS | 2633.26242 | -0.00115 | 3 | 1 | 52.55 | 0 | 2.78E-07 | 0 0 | R14009_38 | 6.73 | 0 | 0 | 2 | MASCOT | T |
| R14009_38_3_16320 | R.NTLAGHSGYLNTVAVSPDGS | 2633.26242 | -0.00055 | 3 | 1 | 65.44 | 0 | 1.43E-08 | 0 0 | R14009_38 | 6.73 | 0 | 0 | 2 | MASCOT | T |
| R14009_38_3_16417 | R.NTLAGHSGYLNTVAVSPDGS | 2633.26242 | 0.00113  | 3 | 1 | 51.03 | 0 | 3.94E-07 | 0 0 | R14009_38 | 6.73 | 0 | 0 | 2 | MASCOT | T |
| R14009_38_3_3220  | R.QIVSASR.D            | 760.43117  | 0.00016  | 2 | 1 | 39.92 | 0 | 5.09E-06 | 0 0 | R14009_38 | 9.75 | 0 | 0 | 2 | MASCOT | T |
| R14009_38_3_3260  | R.QIVSASR.D            | 760.43117  | 0.00036  | 2 | 1 | 48.29 | 0 | 7.41E-07 | 0 0 | R14009_38 | 9.75 | 0 | 0 | 2 | MASCOT | T |
| R14009_38_3_3293  | R.QIVSASR.D            | 760.43117  | 0.00026  | 2 | 1 | 49.8  | 0 | 5.24E-07 | 0 0 | R14009_38 | 9.75 | 0 | 0 | 2 | MASCOT | T |
| R14009_38_3_3325  | R.QIVSASR.D            | 760.43117  | 0.0001   | 2 | 1 | 46.61 | 0 | 1.09E-06 | 0 0 | R14009_38 | 9.75 | 0 | 0 | 2 | MASCOT | T |
| R14009_38_3_3350  | R.QIVSASR.D            | 760.43117  | 0        | 2 | 1 | 46.91 | 0 | 1.02E-06 | 0 0 | R14009_38 | 9.75 | 0 | 0 | 2 | MASCOT | T |
| R14009_38_3_3375  | R.QIVSASR.D            | 760.43117  | -0.0001  | 2 | 1 | 48.05 | 0 | 7.83E-07 | 0 0 | R14009_38 | 9.75 | 0 | 0 | 2 | MASCOT | T |
| R14009_38_3_3403  | R.QIVSASR.D            | 760.43117  | 0.00004  | 2 | 1 | 48.3  | 0 | 7.40E-07 | 0 0 | R14009_38 | 9.75 | 0 | 0 | 2 | MASCOT | T |
| R14009_38_3_3436  | R.QIVSASR.D            | 760.43117  | 0.0003   | 2 | 1 | 49.78 | 0 | 5.26E-07 | 0 0 | R14009_38 | 9.75 | 0 | 0 | 2 | MASCOT | T |
| R14009_38_3_3469  | R.QIVSASR.D            | 760.43117  | 0.00036  | 2 | 1 | 45.8  | 0 | 1.32E-06 | 0 0 | R14009_38 | 9.75 | 0 | 0 | 2 | MASCOT | T |
| R14009_38_3_3504  | R.QIVSASR.D            | 760.43117  | 0.00036  | 2 | 1 | 34.68 | 0 | 1.70E-05 | 0 0 | R14009_38 | 9.75 | 0 | 0 | 2 | MASCOT | T |
| R14009_38_3_3540  | R.QIVSASR.D            | 760.43117  | 0.00092  | 2 | 1 | 31.67 | 0 | 3.40E-05 | 0 0 | R14009_38 | 9.75 | 0 | 0 | 2 | MASCOT | T |
| R14009_38_3_11705 | R.VWGIGR.Y             | 687.39367  | 0.00051  | 2 | 1 | 20.37 | 0 | 4.59E-04 | 0 0 | R14009_38 | 9.72 | 0 | 0 | 2 | MASCOT | T |
| R14009_38_3_11737 | R.VWGIGR.Y             | 687.39367  | 0.00035  | 2 | 1 | 20.37 | 0 | 4.59E-04 | 0 0 | R14009_38 | 9.72 | 0 | 0 | 2 | MASCOT | T |
| R14009_38_3_11802 | R.VWGIGR.Y             | 687.39367  | -0.00033 | 2 | 1 | 20.4  | 0 | 4.56E-04 | 0 0 | R14009_38 | 9.72 | 0 | 0 | 2 | MASCOT | T |
| R14009_38_3_11834 | R.VWGIGR.Y             | 687.39367  | -0.00065 | 2 | 1 | 20.37 | 0 | 4.59E-04 | 0 0 | R14009_38 | 9.72 | 0 | 0 | 2 | MASCOT | T |
| R14009_38_3_11867 | R.VWGIGR.Y             | 687.39367  | -0.00067 | 2 | 1 | 20.39 | 0 | 4.57E-04 | 0 0 | R14009_38 | 9.72 | 0 | 0 | 2 | MASCOT | T |
| R14009_38_3_11901 | R.VWGIGR.Y             | 687.39367  | -0.00031 | 2 | 1 | 20.38 | 0 | 4.58E-04 | 0 0 | R14009_38 | 9.72 | 0 | 0 | 2 | MASCOT | T |
| R14009_38_3_11934 | R.VWGIGR.Y             | 687.39367  | -0.00053 | 2 | 1 | 20.38 | 0 | 4.58E-04 | 0 0 | R14009_38 | 9.72 | 0 | 0 | 2 | MASCOT | T |
| R14009_38_3_11967 | R.VWGIGR.Y             | 687.39367  | -0.00037 | 2 | 1 | 20.4  | 0 | 4.56E-04 | 0 0 | R14009_38 | 9.72 | 0 | 0 | 2 | MASCOT | T |
| R14009_38_3_12033 | R.VWGIGR.Y             | 687.39367  | -0.00001 | 2 | 1 | 20.39 | 0 | 4.57E-04 | 0 0 | R14009_38 | 9.72 | 0 | 0 | 2 | MASCOT | T |
| R14009_38_3_12066 | R.VWGIGR.Y             | 687.39367  | 0.00003  | 2 | 1 | 20.33 | 0 | 4.63E-04 | 0 0 | R14009_38 | 9.72 | 0 | 0 | 2 | MASCOT | T |
| R14009_38_3_12134 | R.VWGIGR.Y             | 687.39367  | 0.00017  | 2 | 1 | 20.39 | 0 | 4.57E-04 | 0 0 | R14009_38 | 9.72 | 0 | 0 | 2 | MASCOT | T |
| R14009_38_3_17558 | R.YWLCAATENSIR.I       | 1483.6998  | 0.00051  | 2 | 1 | 37    | 0 | 9.98E-06 | 0 0 | R14009_38 | 5.99 | 0 | 0 | 2 | MASCOT | T |
| R14009_38_3_17601 | R.YWLCAATENSIR.I       | 1483.6998  | 0.00041  | 2 | 1 | 52.62 | 0 | 2.74E-07 | 0 0 | R14009_38 | 5.99 | 0 | 0 | 2 | MASCOT | T |
| R14009_38_3_17632 | R.YWLCAATENSIR.I       | 1483.6998  | -0.00021 | 2 | 1 | 59.9  | 0 | 5.12E-08 | 0 0 | R14009_38 | 5.99 | 0 | 0 | 2 | MASCOT | T |
| R14009_38_3_17664 | R.YWLCAATENSIR.I       | 1483.6998  | -0.00021 | 2 | 1 | 52.7  | 0 | 2.69E-07 | 0 0 | R14009_38 | 5.99 | 0 | 0 | 2 | MASCOT | T |
| R14009_38_3_17697 | R.YWLCAATENSIR.I       | 1483.6998  | 0.00057  | 2 | 1 | 56.39 | 0 | 1.15E-07 | 0 0 | R14009_38 | 5.99 | 0 | 0 | 2 | MASCOT | T |

|                    |                    |           |          |   |   |       |   |          |     |           |      |   |   |   |        |   |
|--------------------|--------------------|-----------|----------|---|---|-------|---|----------|-----|-----------|------|---|---|---|--------|---|
| R14009_38_3, 17730 | R. YWLCAATENSIR. I | 1483.6998 | -0.00019 | 2 | 1 | 59.99 | 0 | 5.01E-08 | 0 0 | R14009_38 | 5.99 | 0 | 0 | 2 | MASCOT | T |
| R14009_38_3, 17763 | R. YWLCAATENSIR. I | 1483.6998 | 0.00057  | 2 | 1 | 58.72 | 0 | 6.71E-08 | 0 0 | R14009_38 | 5.99 | 0 | 0 | 2 | MASCOT | T |
| R14009_38_3, 17796 | R. YWLCAATENSIR. I | 1483.6998 | -0.00049 | 2 | 1 | 52.52 | 0 | 2.80E-07 | 0 0 | R14009_38 | 5.99 | 0 | 0 | 2 | MASCOT | T |
| R14009_38_3, 17829 | R. YWLCAATENSIR. I | 1483.6998 | -0.00011 | 2 | 1 | 52.35 | 0 | 2.91E-07 | 0 0 | R14009_38 | 5.99 | 0 | 0 | 2 | MASCOT | T |
| R14009_38_3, 17863 | R. YWLCAATENSIR. I | 1483.6998 | 0.00039  | 2 | 1 | 52.25 | 0 | 2.98E-07 | 0 0 | R14009_38 | 5.99 | 0 | 0 | 2 | MASCOT | T |
| R14009_38_3, 17897 | R. YWLCAATENSIR. I | 1483.6998 | 0.00069  | 2 | 1 | 41.04 | 0 | 3.94E-06 | 0 0 | R14009_38 | 5.99 | 0 | 0 | 2 | MASCOT | T |
| R14009_38_3, 17934 | R. YWLCAATENSIR. I | 1483.6998 | 0.00073  | 2 | 1 | 39.36 | 0 | 5.79E-06 | 0 0 | R14009_38 | 5.99 | 0 | 0 | 2 | MASCOT | T |
| R14009_38_3, 17989 | R. YWLCAATENSIR. I | 1483.6998 | 0.00145  | 2 | 1 | 40.72 | 0 | 4.24E-06 | 0 0 | R14009_38 | 5.99 | 0 | 0 | 2 | MASCOT | T |
| R14009_38_3, 18034 | R. YWLCAATENSIR. I | 1483.6998 | -0.00181 | 2 | 1 | 45.72 | 0 | 1.34E-06 | 0 0 | R14009_38 | 5.99 | 0 | 0 | 2 | MASCOT | T |

----- summary -----

Total protein : 1

Total protein group : 1

| UniPepCount | ProteinGroupCount | Percent | ProteinCount | Percent |
|-------------|-------------------|---------|--------------|---------|
| 30          | 1                 | 100.00% | 1            | 100.00% |
