# Supplementary material for: Sumoylation stabilizes RACK1B and enhance its interaction with RAP2.6 in the abscisic acid response
Source: PubMed Central journal article supplement (PMC5341030; doi:10.1038/srep44090), 2017-03-08
Supplement: srep44090-s3.pdf [file srep44090-s3.pdf]

## Supplementary Table S2. MS scan for sumoylation of RACK1B *in vivo*

|       | Reference            | PepCount                         | UniquePepCount | CoverPercent | MW       | PI   | Score | DeltaScore | ExpectValue | Ions | Reference     | DIFF_MOD | PI | MissCleavage | Modification | MatchedTIC | NumProteaseTermini | Engine | Decoy  |   |
|-------|----------------------|----------------------------------|----------------|--------------|----------|------|-------|------------|-------------|------|---------------|----------|----|--------------|--------------|------------|--------------------|--------|--------|---|
|       | FileScan             | Sequence                         | MH+            | Diff (MH+)   | Charge   | Rank |       |            |             |      |               |          |    |              |              |            |                    |        |        |   |
| \$1-1 | AtrACK1B             |                                  | 15             | 39.57%       | 35800.11 | 6.66 |       |            |             |      |               |          |    |              |              |            |                    |        |        |   |
|       | R15025_10_1_2, 22656 | K. DGVILLWDLAEGK. K              | 1428.7733      | -0.00043     | 2        | 1    | 26.27 | 0          | 1.18E-04    | 0 0  | AtrACK1B      |          |    | 4.03         | 0            | 0          | 0                  | 2      | MASCOT | T |
|       | R15025_10_1_2, 15528 | K. DVLSVAFSTDNK. Q               | 1323.65393     | 0.00058      | 2        | 1    | 33.93 | 0          | 2.02E-05    | 0 0  | AtrACK1B      |          |    | 4.21         | 0            | 0          | 0                  | 2      | MASCOT | T |
|       | R15025_10_1_2, 15619 | K. DVLSVAFSTDNK. Q               | 1323.65393     | 0.00028      | 2        | 1    | 65.48 | 0          | 1.42E-08    | 0 0  | AtrACK1B      |          |    | 4.21         | 0            | 0          | 0                  | 2      | MASCOT | T |
|       | R15025_10_1_2, 11744 | K. LWNTLGECK. Y                  | 1120.54555     | -0.00012     | 2        | 1    | 33.48 | 0          | 4.49E-05    | 0 0  | AtrACK1B      |          |    | 5.99         | 0            | 0          | 0                  | 2      | MASCOT | T |
|       | R15025_10_1_2, 11840 | K. LWNTLGECK. Y                  | 1120.54555     | 0.00036      | 2        | 1    | 32.82 | 0          | 5.22E-05    | 0 0  | AtrACK1B      |          |    | 5.99         | 0            | 0          | 0                  | 2      | MASCOT | T |
|       | R15025_10_1_2, 13864 | K. SVVEDLKYVDLK. A               | 1244.70964     | -0.00009     | 2        | 1    | 36.87 | 0          | 2.06E-05    | 0 0  | AtrACK1B      |          |    | 4.56         | 1            | 0          | 0                  | 2      | MASCOT | T |
|       | R15025_10_1_2, 6967  | K. YTISEADGHK. E                 | 1120.52691     | 0.00033      | 2        | 1    | 33.39 | 0          | 4.58E-05    | 0 0  | AtrACK1B      |          |    | 5.32         | 0            | 0          | 0                  | 2      | MASCOT | T |
|       | R15025_10_1_2, 11189 | K. YTISEADGHKEWVSCVR. F          | 2036.94945     | 0.00059      | 3        | 1    | 32.3  | 0          | 2.94E-05    | 0 0  | AtrACK1B      |          |    | 5.45         | 1            | 0          | 0                  | 2      | MASCOT | T |
|       | R15025_10_1_2, 20747 | R. FSPNTLVPTIVSASWDK. T          | 1861.96945     | -0.00048     | 2        | 1    | 35.2  | 0          | 1.51E-05    | 0 0  | AtrACK1B      |          |    | 5.84         | 0            | 0          | 0                  | 2      | MASCOT | T |
|       | R15025_10_1_2, 13652 | R. LWDLATGESTR. R                | 1248.62189     | 0.0005       | 2        | 1    | 63.83 | 0          | 2.07E-08    | 0 0  | AtrACK1B      |          |    | 4.37         | 0            | 0          | 0                  | 2      | MASCOT | T |
|       | R15025_10_1_2, 13741 | R. LWDLATGESTR. R                | 1248.62189     | 0.00032      | 2        | 1    | 45.45 | 0          | 1.43E-06    | 0 0  | AtrACK1B      |          |    | 4.37         | 0            | 0          | 0                  | 2      | MASCOT | T |
|       | R15025_10_1_2, 13839 | R. LWDLATGESTR. R                | 1248.62189     | 0.00002      | 2        | 1    | 29.3  | 0          | 5.87E-05    | 0 0  | AtrACK1B      |          |    | 4.37         | 0            | 0          | 0                  | 2      | MASCOT | T |
|       | R15025_10_1_2, 13931 | R. NTLAGHSGYLNTVAVSPDGLCASGGK. I | 2633.26242     | 0.00179      | 3        | 1    | 44.36 | 0          | 1.83E-06    | 0 0  | AtrACK1B      |          |    | 6.73         | 0            | 0          | 0                  | 2      | MASCOT | T |
|       | R15025_10_1_2, 14583 | R. YWLCAATENSIR. I               | 1483.6998      | 0.00095      | 2        | 1    | 50.84 | 0          | 4.12E-07    | 0 0  | AtrACK1B      |          |    | 5.99         | 0            | 0          | 0                  | 2      | MASCOT | T |
|       | R15025_10_1_2, 14678 | R. YWLCAATENSIR. I               | 1483.6998      | 0.00055      | 2        | 1    | 35.38 | 0          | 1.45E-05    | 0 0  | AtrACK1B      |          |    | 5.99         | 0            | 0          | 0                  | 2      | MASCOT | T |
| \$2-1 | AtSUMO_1_H89R        |                                  | 8              | 29.03%       | 10493.61 | 4.93 |       |            |             |      |               |          |    |              |              |            |                    |        |        |   |
|       | R15025_10_1_2, 11835 | K. GQDQNEVFFR. I                 | 1168.53818     | 0.00011      | 2        | 1    | 64.14 | 0          | 1.93E-08    | 0 0  | AtSUMO_1_H89R |          |    | 4.37         | 0            | 0          | 0                  | 2      | MASCOT | T |
|       | R15025_10_1_2, 11926 | K. GQDQNEVFFR. I                 | 1168.53818     | -0.00001     | 2        | 1    | 64.22 | 0          | 1.89E-08    | 0 0  | AtSUMO_1_H89R |          |    | 4.37         | 0            | 0          | 0                  | 2      | MASCOT | T |
|       | R15025_10_1_2, 12014 | K. GQDQNEVFFR. I                 | 1168.53818     | -0.00011     | 2        | 1    | 64.46 | 0          | 1.79E-08    | 0 0  | AtSUMO_1_H89R |          |    | 4.37         | 0            | 0          | 0                  | 2      | MASCOT | T |
|       | R15025_10_1_2, 12105 | K. GQDQNEVFFR. I                 | 1168.53818     | 0.00017      | 2        | 1    | 51.16 | 0          | 3.83E-07    | 0 0  | AtSUMO_1_H89R |          |    | 4.37         | 0            | 0          | 0                  | 2      | MASCOT | T |
|       | R15025_10_1_2, 12204 | K. GQDQNEVFFR. I                 | 1168.53818     | -0.00009     | 2        | 1    | 63.16 | 0          | 2.42E-08    | 0 0  | AtSUMO_1_H89R |          |    | 4.37         | 0            | 0          | 0                  | 2      | MASCOT | T |
|       | R15025_10_1_2, 10685 | K. VKGQDQNEVFFR. I               | 1395.70155     | -0.00021     | 2        | 1    | 48.88 | 0          | 6.47E-07    | 0 0  | AtSUMO_1_H89R |          |    | 6.04         | 1            | 0          | 0                  | 2      | MASCOT | T |
|       | R15025_10_1_2, 10775 | K. VKGQDQNEVFFR. I               | 1395.70155     | 0.00091      | 2        | 1    | 77.46 | 0          | 8.97E-10    | 0 0  | AtSUMO_1_H89R |          |    | 6.04         | 1            | 0          | 0                  | 2      | MASCOT | T |
|       | R15025_10_1_2, 21190 | R. QSVDMNSIAFLFDGR. R            | 1699.81083     | 0.00111      | 2        | 1    | 54.21 | 0          | 1.90E-07    | 0 0  | AtSUMO_1_H89R |          |    | 4.21         | 0            | 0          | 0                  | 2      | MASCOT | T |

----- summary -----

Total protein: 2

Total protein: 2

| UniPepCount | ProteinGroupCount | Percent | ProteinCount | Percent |
|-------------|-------------------|---------|--------------|---------|
| 3           | 1                 | 50.00%  | 1            | 29.03%  |
| 10          | 1                 | 50.00%  | 1            | 39.57%  |
