# Supplementary material for: Sumoylation stabilizes RACK1B and enhance its interaction with RAP2.6 in the abscisic acid response
Source: PubMed Central journal article supplement (PMC5341030; doi:10.1038/srep44090), 2017-03-08
Supplement: srep44090-s4.pdf [file srep44090-s4.pdf]

**Supplementary Table S3. Primers used in this study**

| Purpose                        | Gene                                       | Terminal vector              | Name                      | Sequence (5'→3')                |
|--------------------------------|--------------------------------------------|------------------------------|---------------------------|---------------------------------|
| Recombinant protein expression | SUM1                                       | pCDFDuet-1<br>pGreenII 62-SK | SUM1-F                    | ATGTCTGCAAACCAGGAGGAAGAC        |
|                                |                                            |                              | SUM1(GG)-R                | TCAGGCCGTAGCACCACC              |
|                                |                                            |                              | SUM1(AA)-R                | TCAAGCAGCAGTCTGATGGAG           |
|                                |                                            |                              | SUM1(QTGG)-R              | TCAGCCACCAGTCTGATGGAGCA         |
|                                | SUM3                                       | pCDFDuet-1                   | SUM3-F                    | ATGTCTAACCTCAAGATGACAAGC        |
|                                |                                            |                              | SUM3 (GG)-R               | TTAACCACCACTCATCGCCCG           |
|                                | SUM5                                       | pCDFDuet-1                   | SUM5-F                    | ATGGTGAGTCCACAGACACAATCT        |
|                                |                                            |                              | SUM5 (GG)-R               | TCAGCCACCACCAAGTTCCATG          |
|                                | UBQ                                        | pGreenII 62-SK               | UBQ-F                     | ATGCAGATCTTCGTTAAGACTCTCA       |
|                                |                                            |                              | UBQ-R                     | TTAGAAACCACCACGGAGACG           |
|                                | SAE1B                                      | pACYCDuet-1                  | SAE1B-F                   | ATGGACGGAGATGAGCTCACC           |
|                                |                                            |                              | SAE1B-R                   | TTAAAGCTTGTTGGATAGGTCCTC        |
|                                | SAE2                                       | pACYCDuet-1                  | SAE2-F                    | ATGGCTACGCAACAACAGC             |
|                                |                                            |                              | SAE2-R                    | CTATTCAACTCTTATCTTCTTT          |
|                                | SCE1A                                      | pCDFDuet-1<br>pGS-21a        | SCE1A-F                   | ATGCGCTAGTGAATCGCTCGTG          |
|                                |                                            |                              | SCE1A-R                   | TTAGACAAGAGCAGGATACTGCTTGGA     |
|                                | SIZ1                                       | pGS-21a                      | SIZ1-F                    | ATGGATTGGAAGCTAATTGTAAGG        |
|                                |                                            |                              | SIZ1-R                    | TTAAACTCCGGTGTCTTGCTGATG        |
|                                | HPY2/MMS 21                                | pGreenII 62-SK               | HPY2-F                    | ATGGCGTCGGCGTCTCGTCTGACG        |
|                                |                                            |                              | HPY2-R                    | CTAATCTTCATCCACATCTTCTGTG       |
| RACK1A                         | pET28a                                     | R1A-F                        | ATGGCGGAAGGACTCGTTTTG     |                                 |
|                                |                                            | R1A-R                        | CTAGTAACGACCAATACCCCAAAC  |                                 |
| RACK1C                         | pET28a                                     | R1C-F                        | ATGGCCGAGGACTCGTATTG      |                                 |
|                                |                                            | R1C-R                        | CTAGTAACGACCAATACCCCAAAC  |                                 |
| RAP2.6                         | pET28a<br>pGreenII 62-SK                   | 2.6-F                        | ATGGTGTCTATGCTGACTAATGTTG |                                 |
|                                |                                            | 2.6-R                        | TTAACCAAAGAGGAGTAATTGTAT  |                                 |
| RACK1B                         | pET28a<br>pGreenII 62-SK<br>pGS-21a<br>pHB | R1B-F                        | ATGGCTGAAGGACTCGTGTG      |                                 |
|                                |                                            | R1B-R                        | CTAGTAACGACCAATACCCCAAAC  |                                 |
| Site-directed mutagenesis      | SCE1A                                      | pMD19                        | K15R-F                    | GCTGAAGAGAGGAGATCGTGGAGGAAGAATC |
|                                |                                            |                              | K15R-R                    | CTCCTCTTTCAGCTAAACGACC          |
|                                |                                            |                              | C94S-F                    | CCATCTGGAAGTGCAGTCTCTCTATCCTT   |
|                                |                                            |                              | C94S-R                    | TGACAGTTCAGATGGATAGACATTAG      |
| Truncated RAP2.6               | RAP2.6                                     | pET28a                       | Δ1-F                      | ATGGTGTCTATGCTGACTAATGTTG       |
|                                |                                            |                              | Δ1-R                      | TTATTTGGCCTCTCCAAGGACA          |
|                                |                                            |                              | AP2-F                     | ATGAAATATAGAGGAGTAAGGCAACGAC    |
|                                |                                            |                              | AP2-R                     | TTAAATCGTCTGAGTTCCAACATTT       |
|                                |                                            |                              | Δ2-F                      | ATGGTGTCTATGCTGACTAATGTTG       |
|                                |                                            |                              | Δ2-R                      | TTATGTCGCCTTGTGTGGGTCT          |
|                                |                                            |                              | Δ3-F                      | ATGGTGTCTATGCTGACTAATGTTG       |
| Δ3-R                           | TTAAATCGTCTGAGTTCCAACATTT                  |                              |                           |                                 |
